# Supplementary material for: Practical analytical solutions for benchmarking of 2-D and 3-D geodynamic Stokes problems with variable viscosity
Source: Copernicus journal article supplement (doi:10.5194/se-5-461-2014), 2014-06-10
Supplement: Supplementary file 1 [file for code user.doc]

The main file for computation is Variable_viscosity3D_tests2.m.

Other files are used during computations. You can choose 2-D or 3-D cases, type of viscosity variation (linear or exponential) and input the values of the viscosity at the vertices of rectangle (or parallelepiped in 3-D case).

Comments are given throughout the code.
