# Supplementary material for: Practical analytical solutions for benchmarking of 2-D and 3-D geodynamic Stokes problems with variable viscosity
Source: Copernicus journal article supplement (doi:10.5194/se-5-461-2014), 2014-06-10
Supplement: Supplementary file 2 [file se-5-461-2014-supplement.zip]

Archive with 46 entries (43 files):
- supplement-cover-letter.pdf
- supplement/
- supplement/supplement.pdf
- supplement/supplement.tex
- supplement/figures for supplement/
- supplement/figures for supplement/fig_4_3D_low.jpg
- supplement/figures for supplement/fig_3_2D_low_exp.jpg
- supplement/figures for supplement/fig_4_2D_high_exp.jpg
- supplement/figures for supplement/fig_1b_3D_low.jpg
- supplement/figures for supplement/fig_3_2D_high_lin.jpg
- supplement/figures for supplement/fig_1b_low_lin.jpg
- supplement/figures for supplement/fig_1_2D_low_lin.jpg
- supplement/figures for supplement/fig_4_low_lin.jpg
- supplement/figures for supplement/fig_4_2D_high_lin.jpg
- supplement/figures for supplement/fig_3_2D_low_lin.jpg
- supplement/figures for supplement/fig_3_3D_low.jpg
- supplement/figures for supplement/fig_1a_high.jpg
- supplement/figures for supplement/fig_1_2D_low_exp.jpg
- supplement/figures for supplement/fig_4_high.jpg
- supplement/figures for supplement/fig_3_low_lin.jpg
- supplement/figures for supplement/fig_3_high_lin.jpg
- supplement/figures for supplement/fig_1b_high.jpg
- supplement/figures for supplement/fig_4_high_lin.jpg
- supplement/figures for supplement/fig_1a_3D_low.jpg
- supplement/figures for supplement/fig_3_high.jpg
- supplement/figures for supplement/fig_1_2D_high_lin.jpg
- supplement/figures for supplement/fig_1_2D_high_exp.jpg
- supplement/figures for supplement/fig_4_2D_low_lin.jpg
- supplement/figures for supplement/fig_1b_high_lin.jpg
- supplement/figures for supplement/fig_1a_low_lin.jpg
- supplement/figures for supplement/fig_4_2D_low_exp.jpg
- supplement/figures for supplement/fig_1a_high_lin.jpg
- supplement/figures for supplement/fig_3_2D_high_exp.jpg
- supplement/code/
- supplement/code/Stokes_Continuity3D_prolongation.m
- supplement/code/Stokes_Continuity3D_viscous_smoother.m
- supplement/code/eval_anal_Dani.m
- supplement/code/eval_sol_cx.m
- supplement/code/for code user.doc
- supplement/code/eval_sol_kz.m
- supplement/code/~$r code user.doc
- supplement/code/Stokes_Continuity3D_viscous_restriction.m
- supplement/code/Variable_viscosity3D_tests2.m
- supplement/code/sol_visc3d.m
- supplement/code/Viscosity_restriction3D.m
- supplement/code/sol_visc3d.asv
