# Supplementary material for: Practical analytical solutions for benchmarking of 2-D and 3-D geodynamic Stokes problems with variable viscosity
Source: Copernicus journal article supplement (doi:10.5194/se-5-461-2014), 2014-06-10
Supplement: Supplementary file 2 [file se-5-461-2014-supplement.zip › supplement/code/eval_sol_cx.m]

function sol = eval_sol_cx( x, z )

PI = 3.14159265358979323846264338328;

%  Status:
% 	u,v - flow field direction is correct
%   p - magnitude and locations look correct
%
%  eta = eta_A if x <= x_c
%  eta = eta_B if x > x_c
%  rho = cos( nx.pi.x ).sin( nz.pi.z )
%  nx : integer
%  nz : double

% double pos[],
% double _eta_A, double _eta_B, 	    % Input parameters: density, viscosity A, viscosity B %
% double _x_c, int _nx, double _nz, 	% Input parameters: viscosity jump location (in x), wavenumber in x,z %
% double vel[], double* pressure, double total_stress[], double strain_rate[] )


% del_rho = sin(n*Pi*z)*cos(nx*Pi*x)  n=nx gives only non-zero terms%
n  = 1; % only one n in Fourier series because  del_rho has cos term %
nx = 1; % can set these two to whatever we like %

ZA = 1;   % left column viscosity %
ZB = 1e6; % right column viscosity %
xc = 0.5;

sum1=0.0;
sum2=0.0;
sum3=0.0;
sum4=0.0;
sum5=0.0;
sum6=0.0;

% Note that there is no Fourier sum here.
%**************************************************************************************%
C1A = 0;
%**************************************************************************************%
t1 = nx * 0.3141592654e1;
t2 = sin(t1);
t3 = nx * t2;
t4 = n * n;
t5 = t4 * t4;
t6 = 0.3141592654e1 * 0.3141592654e1;
t8 = t3 * t5 * t6;
t9 = ZA * xc;
t12 = exp(xc * n * 0.3141592654e1);
t13 = t12 * t12;
t15 = n * 0.3141592654e1;
t16 = exp(t15);
t17 = t16 * t16;
t18 = t17 * t16;
t19 = ZB * t13 * t18;
t20 = t9 * t19;
t23 = ZA * ZA;
t24 = nx * nx;
t25 = t24 * nx;
t26 = t23 * t25;
t28 = t13 * t13;
t29 = t28 * t13;
t33 = nx * ZB;
t34 = t1 * xc;
t35 = sin(t34);
t36 = t4 * n;
t37 = t35 * t36;
t38 = t33 * t37;
t39 = 0.3141592654e1 * ZA;
t40 = t13 * t12;
t41 = t17 * t40;
t45 = ZB * ZB;
t46 = t45 * t24;
t47 = t46 * t4;
t48 = 0.3141592654e1 * xc;
t49 = t13 * t17;
t53 = xc * xc;
t54 = t36 * t53;
t56 = t54 * t6 * t45;
t57 = cos(t34);
t58 = t57 * t24;
t59 = t28 * t12;
t60 = t17 * t59;
t61 = t58 * t60;
t64 = t25 * t2;
t65 = t64 * t15;
t72 = nx * t23;
t74 = t72 * t2 * t5;
t75 = t6 * t53;
t76 = t16 * t29;
t80 = t23 * n;
t81 = t80 * 0.3141592654e1;
t82 = t18 * t28;
t86 = nx * t5;
t87 = t23 * t6;
t89 = xc * t2;
t90 = t13 * t18;
t91 = t89 * t90;
t94 = t28 * t28;
t96 = t24 * n;
t98 = t4 * t45;
t99 = t98 * 0.3141592654e1;
t100 = t58 * t41;
t104 = 0.3141592654e1 * t25;
t105 = ZA * n * t104;
t106 = t2 * ZB;
t110 = t17 * t17;
t111 = ZA * t110;
t116 = n * t28;
t122 = t64 * t4 * t6;
t126 = t23 * t29 * t4;
t128 = t24 * xc;
t132 = t36 * t23;
t133 = t6 * t57;
t135 = t128 * t41;
t138 = t6 * xc;
t142 = t72 * t2;
t147 = 0.4e1 * t8 * t20 - 0.2e1 * t26 * t2 * t16 * t29 - 0.8e1 * t38 * t39 * t41 + 0.4e1 * t47 * t48 * t49 - 0.8e1 * t56 * t61 - 0.4e1 * t65 * t20 + 0.2e1 * t26 * t2 * t18 * t28 - 0.4e1 * t74 * t75 * t76 - 0.2e1 * t81 * t64 * t82 - 0.4e1 * t86 * t87 * t91 - t23 * t94 * t96 + 0.8e1 * t99 * t100 - 0.2e1 * t105 * t106 * t82 - 0.4e1 * t38 * t48 * t111 * t12 + 0.2e1 * t116 * ZB * t111 * t24 + 0.4e1 * t122 * t20 + 0.4e1 * t126 * 0.3141592654e1 * t17 * t128 + 0.8e1 * t132 * t133 * t135 + 0.4e1 * t74 * t138 * t76 - 0.2e1 * t142 * t4 * t18 * t28;
t149 = ZA * t25 * t2;
t150 = ZB * t28;
t154 = t35 * t5;
t155 = t72 * t154;
t156 = t75 * t41;
t159 = nx * ZA;
t160 = t2 * t36;
t161 = t159 * t160;
t162 = 0.3141592654e1 * ZB;
t163 = t28 * t16;
t167 = t23 * t57;
t168 = t167 * t24;
t169 = n * t110;
t170 = t169 * t40;
t173 = ZA * ZB;
t174 = t173 * t90;
t177 = t36 * 0.3141592654e1;
t181 = t80 * t104;
t184 = n * t17;
t188 = t17 * t29;
t190 = t4 * 0.3141592654e1;
t191 = t190 * t24;
t206 = t138 * t60;
t209 = t23 * t4;
t211 = t209 * t6 * t25;
t212 = t89 * t76;
t216 = ZB * t16 * t29;
t217 = t9 * t216;
t220 = ZB * t110;
t221 = ZA * t24;
t222 = t221 * n;
t225 = t132 * t75;
t232 = t45 * t28;
t233 = t110 * t24;
t234 = t233 * n;
t236 = t209 * 0.3141592654e1;
t237 = t17 * xc;
t239 = t237 * t13 * t24;
t242 = -0.2e1 * t149 * t150 * t16 - 0.8e1 * t155 * t156 - 0.2e1 * t161 * t162 * t163 + 0.2e1 * t168 * t170 + 0.2e1 * t65 * t174 - 0.2e1 * t142 * t177 * t76 + 0.4e1 * t181 * t91 - 0.4e1 * t168 * t184 * t59 - 0.4e1 * t188 * t23 * t191 + 0.4e1 * t38 * t48 * ZA * t17 * t40 + 0.4e1 * t49 * t23 * t191 + 0.2e1 * t26 * t2 * t13 * t18 - 0.8e1 * t155 * t206 + 0.4e1 * t211 * t212 - 0.4e1 * t8 * t217 + 0.2e1 * t220 * t222 - 0.8e1 * t225 * t100 + 0.2e1 * t142 * t4 * t16 * t29 + t232 * t234 - 0.4e1 * t236 * t239;
t244 = nx * t45;
t245 = t244 * t37;
t246 = t110 * t40;
t251 = t237 * t59;
t256 = t64 * t90;
t260 = t36 * t45 * t133;
t263 = t45 * t57;
t264 = t263 * t24;
t265 = t169 * t12;
t269 = t6 * t36;
t270 = t17 * t24;
t274 = t110 * t13;
t276 = t190 * t128;
t279 = nx * t36;
t281 = t28 * t40;
t282 = t281 * t35;
t286 = t138 * t41;
t289 = t75 * t60;
t296 = t190 * t173;
t305 = t86 * t45 * t35;
t312 = t33 * t154;
t313 = t6 * ZA;
t324 = t232 * t270;
t327 = -0.2e1 * t245 * t48 * t246 + 0.4e1 * t159 * t37 * t162 * t251 + 0.4e1 * t209 * t75 * t256 + 0.8e1 * t260 * t135 + 0.2e1 * t264 * t265 + 0.32e2 * t9 * t150 * t269 * t270 + 0.4e1 * t274 * t23 * t276 + 0.2e1 * t279 * t45 * t282 * t48 + 0.8e1 * t155 * t286 + 0.8e1 * t155 * t289 - 0.8e1 * t150 * ZA * t96 * t17 + 0.8e1 * t296 * t61 - 0.2e1 * t105 * t106 * t163 - 0.2e1 * t81 * t256 - 0.8e1 * t305 * t156 - 0.4e1 * t33 * t282 * t177 * t9 - 0.16e2 * t312 * t313 * t237 * t40 - 0.4e1 * t168 * t184 * t40 + 0.2e1 * t168 * t265 + 0.16e2 * t269 * t53 * t324;
t328 = t3 * t4;
t331 = t72 * t37;
t332 = t48 * t60;
t335 = n * t94;
t345 = t72 * t35;
t349 = t173 * t57;
t355 = t53 * t17;
t364 = t54 * t6 * ZB;
t365 = t28 * t17;
t369 = xc * ZB;
t370 = t269 * t369;
t371 = ZA * t57;
t373 = t371 * t270 * t40;
t385 = nx * t35;
t396 = t4 * xc;
t397 = t396 * t162;
t415 = t37 * t48;
t418 = -0.32e2 * t364 * t365 * t221 - 0.16e2 * t370 * t373 - 0.4e1 * t331 * t48 * t41 + 0.4e1 * t86 * t23 * t53 * t6 * t2 * t90 + 0.2e1 * t385 * t177 * t23 * xc * t246 + 0.16e2 * t132 * t53 * t6 * t28 * t270 - 0.4e1 * t397 * t371 * t233 * t12 - 0.12e2 * t173 * t58 * t190 * t251 + 0.2e1 * t385 * t36 * 0.3141592654e1 * t23 * xc * t59 - 0.8e1 * t99 * t61 - 0.2e1 * t244 * t59 * t415;
t427 = t371 * t270 * t59;
t439 = t209 * t48;
t440 = t110 * t12;
t441 = t58 * t440;
t447 = t36 * xc;
t455 = t48 * t440;
t471 = ZB * t17;
t492 = 0.12e2 * t397 * t373 - 0.4e1 * t122 * t217 + 0.16e2 * t364 * t427 + 0.16e2 * t312 * t313 * t355 * t40 - 0.8e1 * t279 * t39 * t35 * ZB * t60 + 0.2e1 * t439 * t441 - 0.2e1 * t81 * t64 * t163 + 0.8e1 * t447 * t87 * t61 + 0.2e1 * t23 * t59 * t57 * t276 + 0.2e1 * t245 * t455 - 0.4e1 * t349 * t96 * t440 - 0.16e2 * t370 * t427 + 0.4e1 * t181 * t212 - 0.16e2 * t365 * t23 * t269 * t128 + 0.16e2 * t86 * t138 * ZA * t35 * t471 * t59 + 0.8e1 * t305 * t289 - 0.4e1 * t439 * t100 + 0.2e1 * ZB * t25 * t2 * ZA * t18 * t28 + 0.2e1 * t142 * t4 * t28 * t16 - 0.8e1 * t56 * t100;
t499 = ZA * t53 * t19;
t505 = t396 * 0.3141592654e1;
t518 = t173 * t53 * t16 * t29;
t533 = t23 * t28;
t535 = t188 * t45;
t538 = t24 * t4;
t545 = t3 * t177;
t546 = t173 * t76;
t555 = t45 * t110;
t557 = t72 * t160;
t561 = -0.8e1 * t225 * t61 - 0.2e1 * t161 * t162 * t82 + t533 * t234 + 0.4e1 * t535 * t191 + 0.4e1 * t167 * t538 * t332 + 0.4e1 * t349 * t96 * t60 + 0.2e1 * t545 * t546 - 0.2e1 * t264 * t170 + 0.4e1 * t397 * t281 * ZA * t58 - t555 * t96 - 0.4e1 * t557 * t48 * t76;
t567 = t396 * 0.3141592654e1 * t45;
t568 = t58 * t246;
t597 = t58 * n;
t615 = t13 * t45;
t616 = t615 * t233;
t619 = t94 * t45;
t621 = t45 * t59;
t625 = 0.2e1 * t149 * t216 + 0.2e1 * t567 * t568 - 0.16e2 * t269 * xc * t324 - 0.2e1 * t236 * xc * t281 * t58 - 0.2e1 * t142 * t177 * t90 - 0.8e1 * t567 * t100 + 0.2e1 * t65 * t546 - 0.8e1 * t305 * t206 + 0.2e1 * n * t45 * t281 * t57 * t24 - t23 * t110 * t96 - 0.8e1 * t296 * t100 + 0.2e1 * t23 * t281 * t597 + 0.4e1 * t545 * t20 + 0.2e1 * t159 * t2 * t4 * ZB * t163 - 0.4e1 * t557 * t48 * t90 + 0.4e1 * t122 * t518 + 0.8e1 * t263 * t538 * t332 - 0.4e1 * t505 * t616 - t619 * t96 - 0.2e1 * t621 * t57 * t276;
t626 = t49 * t45;
t660 = t29 * t45;
t685 = 0.2e1 * t545 * t174 - 0.4e1 * t126 * 0.3141592654e1 * t24 * xc - 0.4e1 * t47 * t48 * t188 + 0.4e1 * t505 * t660 * t24 - 0.2e1 * t142 * t177 * t163 - 0.2e1 * t142 * t4 * t13 * t18 + 0.8e1 * t260 * t128 * t60 - 0.2e1 * t328 * t546 - 0.2e1 * t26 * t2 * t28 * t16 + 0.4e1 * t545 * t217 - 0.4e1 * t209 * t138 * t256;
t690 = t6 * 0.3141592654e1;
t691 = ZA * t690;
t693 = t24 * t24;
t694 = t693 * xc;
t695 = t188 * t694;
t698 = t23 * ZA;
t699 = t698 * t690;
t700 = t699 * t5;
t704 = t5 * t4;
t705 = t691 * t704;
t709 = t691 * t5;
t713 = t5 * n;
t714 = t713 * ZB;
t718 = t698 * t6;
t719 = t713 * t28;
t722 = t699 * t704;
t726 = t713 * t94;
t733 = t713 * t45;
t736 = t87 * t36;
t740 = -0.4e1 * t691 * t98 * t695 + 0.8e1 * t700 * t270 * t13 + 0.4e1 * t705 * t660 * xc + 0.8e1 * t709 * t660 * t128 + 0.2e1 * t87 * t714 * t110 + t718 * t719 * t110 - 0.4e1 * t722 * t237 * t13 - t313 * t726 * t45 - 0.4e1 * t699 * t704 * xc * t29 + t313 * t733 * t28 + 0.4e1 * t736 * t150 * t233;
t746 = t313 * t36;
t752 = t6 * t6;
t753 = t23 * t752;
t759 = t698 * t752;
t760 = t759 * t36;
t761 = t17 * t693;
t762 = xc * t28;
t763 = t761 * t762;
t766 = t87 * t713;
t773 = t699 * t4;
t774 = t110 * t693;
t775 = xc * t13;
t785 = t704 * t17;
t789 = -0.16e2 * t736 * t150 * t270 + t718 * t116 * t693 - 0.2e1 * t746 * t555 * t24 + 0.4e1 * t705 * t535 + 0.64e2 * t753 * t713 * t17 * t150 * t128 - 0.16e2 * t760 * t763 + 0.2e1 * t766 * t150 * t110 + 0.4e1 * t722 * t274 * xc + 0.4e1 * t773 * t774 * t775 - 0.8e1 * t766 * t150 * t17 + 0.8e1 * t700 * t233 * t775 + 0.4e1 * t699 * t785 * t13;
t791 = t691 * t4;
t792 = t45 * t693;
t793 = t49 * t792;
t796 = t759 * t713;
t797 = t53 * t28;
t798 = t270 * t797;
t801 = t87 * n;
t818 = t5 * t36;
t819 = t753 * t818;
t827 = t753 * t36 * ZB;
t830 = xc * t45;
t834 = -0.4e1 * t791 * t793 + 0.32e2 * t796 * t798 + 0.2e1 * t801 * ZB * t693 * t110 + 0.2e1 * t718 * t36 * t28 * t24 - 0.8e1 * t700 * t128 * t29 - 0.8e1 * t700 * t239 - 0.8e1 * t801 * t150 * t761 + 0.32e2 * t819 * t365 * t369 - 0.64e2 * t753 * t714 * t798 + 0.32e2 * t827 * t763 + 0.4e1 * t705 * t830 * t49;
t842 = xc * t29;
t843 = t270 * t842;
t849 = t759 * t818;
t853 = t691 * t396;
t857 = t691 * t5 * t45;
t869 = t313 * n;
t874 = -0.2e1 * t718 * t36 * t94 * t24 - 0.4e1 * t773 * t761 * t29 + 0.8e1 * t700 * t843 + 0.2e1 * t87 * t726 * ZB + 0.16e2 * t849 * t797 * t17 + 0.4e1 * t853 * t793 + 0.8e1 * t857 * t239 + 0.2e1 * t801 * t150 * t693 - 0.8e1 * t700 * t270 * t29 - 0.8e1 * t709 * t49 * t46 - t869 * t619 * t693 + t869 * t232 * t693;
t877 = ZA * t752;
t878 = t877 * t818;
t911 = 0.16e2 * t878 * t53 * t45 * t365 - 0.4e1 * t699 * t785 * t29 - 0.4e1 * t705 * t188 * t830 + 0.2e1 * t801 * t94 * t693 * ZB - 0.8e1 * t857 * t843 - t718 * t726 + 0.4e1 * t773 * t761 * t13 - 0.4e1 * t705 * t775 * t555 + 0.2e1 * t746 * t232 * t233 - 0.16e2 * t878 * t830 * t365 - 0.2e1 * t746 * t619 * t24;
t916 = t110 * t28;
t945 = t28 * t693 * t45 * t17;
t948 = 0.32e2 * t877 * t733 * t798 + 0.2e1 * t718 * t36 * t916 * t24 - 0.4e1 * t705 * t626 + t718 * n * t916 * t693 - t869 * t792 * t110 - 0.4e1 * t773 * t761 * t775 + t718 * t719 + 0.2e1 * t746 * t232 * t24 - 0.16e2 * t849 * t365 * xc - t718 * t713 * t110 - 0.4e1 * t773 * t694 * t29 + 0.16e2 * t877 * t54 * t945;
t974 = t761 * t797;
t987 = 0.4e1 * t773 * t695 + 0.4e1 * t736 * t150 * t24 + 0.4e1 * t722 * t842 * t17 - 0.16e2 * t877 * t447 * t945 + 0.2e1 * t87 * t714 * t28 + t313 * t713 * t916 * t45 - 0.4e1 * t853 * t615 * t774 - 0.32e2 * t877 * t713 * xc * t324 + 0.16e2 * t760 * t974 + 0.4e1 * t736 * t94 * t24 * ZB + t869 * t792 * t916 - 0.8e1 * t691 * t5 * xc * t616;
t1021 = -t718 * t169 * t693 - 0.32e2 * t827 * t974 + 0.2e1 * t801 * t150 * t774 + 0.4e1 * t791 * t188 * t792 + 0.4e1 * t736 * t220 * t24 + 0.4e1 * t791 * t842 * t792 + 0.8e1 * t709 * t660 * t270 - t718 * t335 * t693 - 0.2e1 * t718 * t36 * t110 * t24 - 0.32e2 * t819 * t797 * t471 - t313 * t733 * t110 - 0.32e2 * t796 * t270 * t762;

C2A = (t147 - 0.4e1 * t65 * t217 + t418 + 0.2e1 * t150 * t222 + t327 - 0.2e1 * t149 * t19 + 0.2e1 * t335 * ZB * t24 * ZA - 0.16e2 * t312 * t313 * t355 * t59 - 0.4e1 * t281 * ZB * ZA * t597 - 0.2e1 * t505 * t45 * t281 * t58 - 0.4e1 * t211 * t2 * t53 * t76 + 0.8e1 * t305 * t286 - 0.4e1 * t122 * t499 - 0.4e1 * t331 * t332 + 0.8e1 * t345 * t177 * t60 - 0.2e1 * t142 * t177 * t82 + 0.2e1 * t72 * t281 * t415 + 0.4e1 * t349 * t96 * t41 - 0.2e1 * t81 * t64 * t76 + 0.2e1 * t58 * t80 * t59 + 0.8e1 * t345 * t177 * t41 - 0.4e1 * t8 * t499 + t242 + 0.4e1 * t8 * t518 + t625 + t685 + 0.2e1 * t328 * t174 + 0.2e1 * t331 * t455 - 0.2e1 * t33 * t2 * t4 * ZA * t82 - 0.4e1 * t626 * t191 + 0.16e2 * t364 * t373 - 0.2e1 * t621 * t597 - 0.2e1 * t439 * t568 + t492 + t533 * t96 + t232 * t96 + 0.2e1 * t567 * t441 + t561) / (t740 + t789 + t834 + t874 + t911 + t948 + t987 + t1021);
%**************************************************************************************%
t1 = n * n;
t2 = t1 * n;
t3 = t2 * 0.3141592654e1;
t4 = t3 * xc;
t5 = ZB * ZB;
t7 = exp(n * 0.3141592654e1);
t8 = t7 * t7;
t9 = t5 * t8;
t12 = exp(xc * n * 0.3141592654e1);
t13 = t12 * t12;
t14 = t13 * t13;
t15 = t14 * t13;
t19 = nx * nx;
t21 = nx * 0.3141592654e1;
t22 = sin(t21);
t23 = t19 * nx * t22;
t24 = t23 * 0.3141592654e1;
t25 = ZA * ZB;
t26 = t7 * t15;
t27 = t25 * t26;
t30 = t21 * xc;
t31 = sin(t30);
t32 = t31 * nx;
t33 = t32 * n;
t34 = ZA * ZA;
t35 = t8 * t8;
t36 = t34 * t35;
t40 = t2 * t34;
t41 = 0.3141592654e1 * t8;
t42 = t41 * t15;
t45 = t1 * t5;
t46 = t14 * t14;
t49 = t19 * t5;
t51 = t19 * t46;
t53 = t19 * t34;
t55 = t8 * t7;
t56 = t13 * t55;
t57 = t25 * t56;
t60 = t2 * nx;
t61 = 0.3141592654e1 * 0.3141592654e1;
t63 = t60 * t31 * t61;
t64 = xc * xc;
t65 = ZA * t64;
t66 = ZB * t8;
t67 = t14 * t12;
t68 = t66 * t67;
t69 = t65 * t68;
t72 = -0.4e1 * t4 * t9 * t15 + 0.4e1 * t24 * t27 + 0.4e1 * t33 * t36 * t12 - 0.4e1 * t40 * t42 - t45 * t46 + t45 * t14 - t49 * t14 + t51 * t5 - t53 * t14 + 0.4e1 * t24 * t57 + 0.32e2 * t63 * t69;
t73 = t1 * nx;
t75 = t73 * t31 * 0.3141592654e1;
t76 = t8 * t67;
t77 = t25 * t76;
t80 = t1 * t1;
t81 = t80 * t34;
t83 = t61 * t14;
t87 = t1 * t19;
t88 = cos(t30);
t90 = t87 * t88 * t61;
t91 = t5 * t64;
t92 = t13 * t12;
t93 = t8 * t92;
t94 = t91 * t93;
t100 = ZB * t64 * ZA * t8 * t92;
t103 = n * t19;
t105 = t103 * t88 * 0.3141592654e1;
t106 = ZA * xc;
t107 = ZB * t35;
t109 = t106 * t107 * t12;
t112 = t34 * xc;
t113 = t112 * t93;
t116 = t35 * t14;
t118 = t1 * ZA;
t119 = ZB * t14;
t122 = t1 * t46;
t125 = t19 * ZB;
t126 = t35 * ZA;
t127 = t125 * t126;
t129 = t1 * ZB;
t132 = -0.16e2 * t75 * t77 + 0.16e2 * t81 * t64 * t83 * t8 + 0.16e2 * t90 * t94 - 0.32e2 * t90 * t100 + 0.8e1 * t105 * t109 - 0.8e1 * t75 * t113 + t45 * t116 + 0.2e1 * t118 * t119 + 0.2e1 * t122 * t25 - 0.2e1 * t127 + 0.2e1 * t129 * t126;
t134 = t1 * t34;
t136 = t34 * t64;
t137 = t136 * t76;
t141 = t91 * t76;
t145 = t103 * t34;
t146 = 0.3141592654e1 * xc;
t147 = t8 * t13;
t153 = t14 * ZA;
t156 = xc * t5;
t157 = t156 * t93;
t160 = t103 * t5;
t162 = t146 * t8 * t15;
t166 = t34 * t7 * t15;
t169 = t134 * t116 - 0.16e2 * t63 * t137 - t49 * t116 - 0.16e2 * t63 * t141 - t53 * t116 + 0.4e1 * t145 * t146 * t147 - 0.2e1 * t51 * t25 - 0.2e1 * t125 * t153 - 0.16e2 * t75 * t157 + 0.4e1 * t160 * t162 - 0.4e1 * t24 * t166;
t170 = t106 * t68;
t177 = t35 * t92;
t178 = t112 * t177;
t181 = t156 * t76;
t186 = t35 * t12;
t187 = t112 * t186;
t193 = t5 * 0.3141592654e1;
t206 = t34 * t14;
t207 = t206 * t7;
t210 = -0.32e2 * t63 * t170 + 0.32e2 * t90 * t170 + 0.8e1 * t75 * t109 + 0.4e1 * t105 * t178 - 0.16e2 * t75 * t181 - 0.16e2 * t90 * t113 - 0.4e1 * t75 * t187 + 0.16e2 * t90 * t141 - 0.4e1 * t103 * t15 * t193 * xc + 0.16e2 * t73 * t22 * t34 * t146 * t26 + 0.4e1 * t32 * n * t34 * t67 + 0.4e1 * t24 * t207;
t217 = t106 * t66 * t92;
t226 = t88 * t19 * n;
t227 = 0.3141592654e1 * t34;
t229 = t227 * xc * t67;
t232 = t73 * t31;
t234 = t146 * t5 * t67;
t238 = t61 * ZB;
t239 = t14 * t8;
t240 = t238 * t239;
t243 = t136 * t93;
t246 = -0.8e1 * t33 * t25 * t186 + 0.32e2 * t90 * t217 - t45 * t35 + t53 * t35 - t134 * t35 - t134 * t46 + t134 * t14 - 0.4e1 * t226 * t229 + 0.4e1 * t232 * t234 + 0.32e2 * t87 * t65 * t240 + 0.16e2 * t63 * t243;
t247 = t14 * t92;
t249 = t227 * t247 * xc;
t254 = t73 * t22;
t259 = t60 * t22 * t61;
t260 = t112 * t26;
t264 = t146 * t247 * t5;
t268 = xc * t14;
t274 = t5 * t14;
t275 = t274 * t8;
t280 = n * nx;
t281 = t280 * t22;
t282 = t55 * t14;
t283 = t25 * t282;
t290 = ZA * t247 * xc * ZB;
t295 = t22 * nx * t1 * 0.3141592654e1;
t298 = -0.4e1 * t232 * t249 + 0.8e1 * t105 * t217 - 0.4e1 * t254 * t227 * t26 - 0.8e1 * t259 * t260 - 0.4e1 * t232 * t264 - 0.16e2 * t81 * t61 * t268 * t8 + 0.16e2 * t80 * t64 * t61 * t275 - 0.4e1 * t232 * t229 + 0.8e1 * t281 * t283 - 0.4e1 * t105 * t187 + 0.8e1 * t75 * t290 + 0.4e1 * t295 * t27;
t301 = t61 * t5;
t307 = t87 * t34;
t312 = t61 * xc;
t313 = t312 * t239;
t317 = t34 * t55 * t14;
t329 = ZB * t13 * t55;
t330 = t65 * t329;
t337 = -0.16e2 * t87 * t64 * t301 * t239 - 0.32e2 * t90 * t69 - 0.16e2 * t307 * t64 * t61 * t239 + 0.16e2 * t307 * t313 + 0.4e1 * t24 * t317 + t53 * t46 + t49 * t35 - 0.32e2 * t63 * t100 - 0.4e1 * t280 * t31 * t34 * t247 + 0.8e1 * t259 * t330 - 0.4e1 * t280 * t31 * t247 * t5;
t340 = t5 * t35;
t344 = t25 * t93;
t356 = t41 * t13;
t360 = t23 * n * t61;
t363 = t25 * t64 * t7 * t15;
t366 = t156 * t177;
t369 = t14 * t7;
t370 = t25 * t369;
t373 = t156 * t186;
t378 = 0.4e1 * t24 * t283 + 0.4e1 * t33 * t340 * t12 - 0.16e2 * t75 * t344 - 0.4e1 * t280 * t31 * t5 * t67 + 0.8e1 * t33 * t25 * t247 + 0.32e2 * t63 * t217 + 0.4e1 * t40 * t356 - 0.8e1 * t360 * t363 + 0.4e1 * t75 * t366 + 0.4e1 * t295 * t370 - 0.4e1 * t75 * t373 - 0.4e1 * t105 * t366;
t382 = t112 * t76;
t387 = t80 * t61;
t391 = t136 * t26;
t409 = 0.16e2 * t63 * t382 + 0.4e1 * t226 * t234 - 0.16e2 * t387 * xc * t275 + 0.8e1 * t259 * t391 - 0.16e2 * t105 * t344 + 0.4e1 * t226 * t264 - 0.8e1 * t105 * t170 + 0.16e2 * t232 * t193 * t76 + 0.8e1 * t360 * t330 - 0.8e1 * t105 * t290 + 0.16e2 * t90 * t243;
t423 = t153 * t8;
t426 = t34 * t13;
t427 = t426 * t55;
t430 = t34 * t8;
t437 = t80 * ZA;
t441 = 0.4e1 * t145 * t42 - 0.16e2 * t90 * t157 + 0.24e2 * t75 * t217 + 0.4e1 * t226 * t249 + 0.4e1 * t254 * t227 * t282 + 0.4e1 * t160 * t356 - 0.8e1 * t129 * t423 - 0.8e1 * t281 * t427 - 0.8e1 * t33 * t430 * t67 + 0.8e1 * t33 * t430 * t92 + 0.32e2 * t437 * ZB * t313;
t453 = t106 * ZB * t7 * t15;
t456 = t2 * t5;
t459 = t112 * t56;
t462 = t126 * t14;
t474 = t40 * 0.3141592654e1;
t475 = xc * t8;
t480 = t146 * t13 * t35;
t483 = -0.4e1 * t103 * xc * t193 * t147 + 0.16e2 * t87 * t61 * t156 * t239 + 0.8e1 * t259 * t453 - 0.4e1 * t456 * t356 + 0.8e1 * t259 * t459 - 0.2e1 * t125 * t462 - 0.8e1 * t281 * t207 + 0.16e2 * t295 * t459 - 0.8e1 * t60 * t22 * ZA * t312 * t329 + 0.4e1 * t474 * t475 * t15 + 0.4e1 * t160 * t480;
t497 = t136 * t56;
t504 = t9 * t13;
t509 = t475 * t13;
t512 = -0.8e1 * t105 * t113 - 0.4e1 * t254 * t227 * t56 + 0.8e1 * t281 * t57 + 0.4e1 * t295 * t283 + 0.2e1 * t129 * t462 + 0.4e1 * t24 * t370 - 0.8e1 * t360 * t497 - 0.4e1 * t24 * t427 - 0.4e1 * t145 * t162 + 0.4e1 * t4 * t504 - 0.8e1 * t281 * t370 - 0.4e1 * t474 * t509;
t528 = t5 * t13;
t529 = t528 * t35;
t532 = t106 * t329;
t542 = -0.16e2 * t295 * t453 - 0.32e2 * t437 * t64 * t240 + 0.8e1 * t281 * t317 + 0.24e2 * t75 * t170 - 0.4e1 * t75 * t178 + 0.8e1 * t360 * t453 - 0.4e1 * t4 * t529 - 0.16e2 * t295 * t532 - 0.8e1 * t33 * t344 - 0.16e2 * t90 * t181 + 0.4e1 * t33 * t340 * t92;
t557 = t146 * t15;
t562 = xc * t15;
t563 = t562 * t5;
t573 = 0.16e2 * t232 * t193 * t93 - 0.8e1 * t259 * t363 - 0.8e1 * t259 * t497 + 0.8e1 * t33 * t77 + 0.8e1 * t360 * t391 + 0.4e1 * t254 * t227 * t369 + 0.4e1 * t145 * t557 + 0.8e1 * t281 * t166 + 0.4e1 * t3 * t563 + 0.8e1 * t105 * t382 - 0.4e1 * t145 * t480 - 0.4e1 * t33 * t36 * t92;
t600 = 0.4e1 * t456 * t42 - 0.8e1 * t360 * t260 - 0.4e1 * t40 * t557 - 0.4e1 * t105 * t373 + 0.16e2 * t226 * t227 * t93 - 0.16e2 * t90 * t382 - 0.4e1 * t145 * t356 - 0.16e2 * t63 * t157 - 0.32e2 * t87 * t25 * t313 - 0.16e2 * t226 * t227 * t76 - 0.16e2 * t63 * t113;
t623 = xc * t13;
t627 = 0.8e1 * t125 * t423 - 0.8e1 * t360 * t532 + 0.16e2 * t90 * t137 - 0.4e1 * t160 * t42 + 0.16e2 * t63 * t94 + 0.16e2 * t63 * t181 - 0.8e1 * t281 * t27 - 0.8e1 * t75 * t382 + 0.8e1 * t360 * t459 + 0.4e1 * t295 * t57 + 0.16e2 * t105 * t77 + 0.4e1 * t474 * t623 * t35;
t632 = t61 * 0.3141592654e1;
t633 = t632 * t8;
t634 = t80 * n;
t638 = t632 * t634;
t639 = t638 * xc;
t642 = t61 * t34;
t643 = t122 * t19;
t649 = t61 * t61;
t650 = t649 * t1;
t652 = t19 * t19;
t653 = t14 * t652;
t654 = t653 * t9;
t657 = t14 * t1;
t658 = t657 * t19;
t665 = t632 * t34;
t666 = t665 * t2;
t667 = t8 * t19;
t668 = t667 * t623;
t674 = t665 * n;
t675 = t652 * xc;
t682 = 0.8e1 * t633 * t426 * t634 - 0.8e1 * t639 * t529 - 0.4e1 * t642 * t643 + 0.2e1 * t642 * t116 * t80 + 0.32e2 * t650 * t64 * t654 + 0.4e1 * t301 * t658 + 0.4e1 * t387 * t46 * ZA * ZB - 0.16e2 * t666 * t668 - 0.16e2 * t666 * t667 * t15 - 0.8e1 * t674 * t675 * t15 + 0.4e1 * t238 * t153 * t80;
t683 = t46 * t652;
t686 = t633 * t15;
t691 = t35 * t80;
t698 = t35 * t652;
t705 = t14 * t80;
t708 = t61 * t35;
t717 = -0.2e1 * t642 * t683 - 0.8e1 * t686 * t5 * t634 * xc - 0.2e1 * t301 * t691 + 0.8e1 * t638 * t563 - 0.2e1 * t642 * t691 - 0.2e1 * t642 * t698 - 0.2e1 * t301 * t698 - 0.2e1 * t301 * t683 + 0.2e1 * t642 * t705 + 0.2e1 * t708 * t274 * t80 + 0.2e1 * t301 * t653 - 0.2e1 * t642 * t80 * t46;
t727 = t61 * t46;
t737 = t649 * t34;
t738 = t737 * t1;
t739 = t8 * t652;
t740 = t739 * t268;
t746 = t61 * ZA;
t754 = t632 * n * xc;
t758 = 0.2e1 * t301 * t705 + 0.2e1 * t642 * t653 - 0.8e1 * t665 * xc * t634 * t15 - 0.2e1 * t727 * t5 * t80 - 0.32e2 * t650 * xc * t654 + 0.2e1 * t301 * t698 * t14 - 0.32e2 * t738 * t740 + 0.8e1 * t674 * t739 * t562 + 0.4e1 * t746 * t119 * t652 + 0.8e1 * t674 * t698 * t623 - 0.8e1 * t754 * t528 * t698;
t762 = t633 * t13;
t764 = t5 * n * t652;
t767 = t80 * t1;
t768 = t649 * t767;
t772 = t649 * ZA;
t773 = t772 * t129;
t777 = t35 * t1 * t19;
t780 = t632 * t5;
t781 = t780 * t15;
t786 = t698 * ZA;
t790 = t64 * t14;
t800 = t649 * t8;
t809 = 0.4e1 * t238 * t126 * t80 - 0.8e1 * t762 * t764 - 0.32e2 * t768 * xc * t275 + 0.64e2 * t773 * t740 - 0.4e1 * t301 * t777 - 0.8e1 * t781 * n * t8 * t675 + 0.4e1 * t238 * t786 + 0.32e2 * t768 * t34 * t790 * t8 - 0.8e1 * t633 * t528 * t634 + 0.8e1 * t754 * t528 * t739 + 0.128e3 * t800 * t119 * t80 * t19 * t106 + 0.8e1 * t674 * t739 * t13;
t812 = t649 * t80;
t817 = t83 * ZB;
t824 = t746 * ZB;
t828 = t800 * t14;
t855 = -0.64e2 * t812 * xc * t274 * t667 + 0.4e1 * t817 * t786 + 0.4e1 * t727 * ZA * t652 * ZB - 0.32e2 * t824 * t657 * t667 - 0.32e2 * t828 * t34 * t767 * xc - 0.8e1 * t633 * t15 * t34 * t634 - 0.8e1 * t674 * t739 * t15 + 0.32e2 * t768 * t64 * t275 + 0.4e1 * t708 * t14 * t307 + 0.2e1 * t708 * t206 * t652 + 0.8e1 * t632 * t35 * t13 * t34 * t634 * xc;
t858 = t35 * t19;
t873 = t2 * t8;
t878 = t61 * t1;
t901 = -0.16e2 * t632 * t2 * xc * t528 * t858 + 0.8e1 * t824 * t658 + 0.4e1 * t301 * t14 * t777 - 0.8e1 * t665 * t634 * t509 - 0.8e1 * t674 * t739 * t623 - 0.16e2 * t781 * t873 * t19 * xc + 0.8e1 * t878 * t14 * t127 + 0.8e1 * t878 * ZA * t51 * ZB + 0.8e1 * t686 * t764 + 0.8e1 * t665 * xc * t634 * t15 * t8 + 0.8e1 * t633 * t15 * t5 * t634 + 0.4e1 * t387 * t14 * t107 * ZA;
t903 = t739 * t790;
t923 = t737 * t80;
t924 = t667 * t790;
t927 = t780 * t2;
t937 = t15 * t19 * xc;
t943 = 0.32e2 * t738 * t903 + 0.16e2 * t781 * t873 * t19 + 0.8e1 * t754 * t15 * t652 * t5 + 0.16e2 * t666 * t858 * t623 + 0.64e2 * t828 * t25 * t767 * xc - 0.16e2 * t762 * t456 * t19 + 0.64e2 * t923 * t924 + 0.16e2 * t927 * t668 - 0.64e2 * t768 * ZA * t790 * t66 - 0.64e2 * t773 * t903 + 0.16e2 * t927 * t937 + 0.16e2 * t666 * t667 * t562;
t977 = 0.64e2 * t812 * t5 * t924 + 0.8e1 * t639 * t504 + 0.8e1 * t238 * t35 * t118 * t19 + 0.4e1 * t642 * t658 - 0.16e2 * t817 * t437 * t8 - 0.128e3 * t772 * ZB * t80 * t924 + 0.16e2 * t666 * t667 * t13 - 0.4e1 * t301 * t643 - 0.16e2 * t824 * t653 * t8 - 0.4e1 * t642 * t777 - 0.64e2 * t923 * t667 * t268 - 0.16e2 * t666 * t937;

C3A = (t72 + t132 + t169 + t210 + t246 + t298 + t337 + t378 + t409 + t441 + t483 + t512 + t542 + t573 + t600 + t627) / (t682 + t717 + t758 + t809 + t855 + t901 + t943 + t977);
%**************************************************************************************%
C4A = 0;
%**************************************************************************************%
t1 = nx * 0.3141592654e1;
t2 = t1 * xc;
t3 = cos(t2);
t4 = nx * nx;
t6 = n * 0.3141592654e1;
t7 = t3 * t4 * t6;
t8 = ZA * ZB;
t9 = exp(t6);
t10 = t9 * t9;
t11 = xc * n;
t13 = exp(t11 * 0.3141592654e1);
t14 = t13 * t13;
t15 = t14 * t13;
t16 = t14 * t14;
t17 = t16 * t15;
t18 = t10 * t17;
t19 = t8 * t18;
t22 = sin(t2);
t23 = nx * t22;
t24 = t23 * n;
t25 = ZB * ZB;
t30 = n * n;
t31 = t30 * n;
t32 = t31 * nx;
t33 = 0.3141592654e1 * 0.3141592654e1;
t35 = t32 * t22 * t33;
t36 = ZA * ZA;
t37 = t36 * xc;
t38 = t16 * t13;
t39 = t10 * t38;
t40 = t37 * t39;
t43 = sin(t1);
t44 = nx * t43;
t45 = t30 * 0.3141592654e1;
t46 = t44 * t45;
t47 = ZA * xc;
t49 = ZB * t16 * t9;
t54 = t4 * nx * t43;
t55 = xc * xc;
t57 = t54 * t30 * t55;
t58 = t33 * 0.3141592654e1;
t59 = t58 * t25;
t60 = t16 * t9;
t61 = t59 * t60;
t64 = xc * t25;
t65 = t14 * t9;
t66 = t64 * t65;
t70 = t44 * t31 * t33;
t71 = t37 * t65;
t74 = t10 * t15;
t75 = t64 * t74;
t78 = t25 * t10;
t83 = t54 * n * t33;
t84 = t55 * t25;
t85 = t10 * t9;
t86 = t14 * t85;
t87 = t84 * t86;
t90 = t30 * t30;
t92 = t44 * t90 * t58;
t93 = t55 * xc;
t94 = t93 * t25;
t95 = t85 * t16;
t96 = t94 * t95;
t102 = t23 * t45;
t103 = t10 * t10;
t104 = ZB * t103;
t106 = t47 * t104 * t15;
t111 = t54 * 0.3141592654e1;
t112 = t25 * t85;
t113 = t112 * t16;
t115 = t8 * t39;
t118 = t16 * t14;
t119 = t85 * t118;
t120 = t37 * t119;
t123 = t16 * t16;
t124 = t36 * t123;
t125 = t124 * t9;
t127 = -0.8e1 * t7 * t19 + 0.2e1 * t24 * t25 * t13 * t10 - 0.16e2 * t35 * t40 - 0.16e2 * t46 * t47 * t49 - 0.8e1 * t57 * t61 + 0.4e1 * t46 * t66 + 0.2e1 * t70 * t71 - 0.16e2 * t35 * t75 + 0.6e1 * t24 * t78 * t38 - 0.2e1 * t83 * t87 - 0.8e1 * t92 * t96 - 0.8e1 * t46 * t37 * t95 - 0.12e2 * t102 * t106 + 0.2e1 * t83 * t71 + t111 * t113 + 0.8e1 * t7 * t115 + 0.2e1 * t83 * t120 + t111 * t125;
t128 = t37 * t74;
t131 = t44 * n;
t133 = t25 * t9 * t118;
t136 = t36 * t14;
t137 = t136 * t9;
t140 = t30 * t4;
t142 = t140 * t3 * t33;
t143 = t64 * t39;
t147 = t30 * nx * t43;
t148 = 0.3141592654e1 * t36;
t149 = t9 * t118;
t153 = t44 * t31 * ZA;
t154 = t33 * xc;
t155 = t154 * t49;
t160 = ZA * t17 * xc * ZB;
t163 = t103 * t13;
t164 = t64 * t163;
t170 = t44 * t90 * t55;
t171 = t58 * ZB;
t172 = ZA * t16;
t174 = t171 * t172 * t9;
t177 = t36 * t55;
t178 = t177 * t149;
t181 = t54 * t11;
t182 = t33 * t25;
t186 = t25 * t14;
t187 = t186 * t9;
t193 = t186 * t85;
t198 = ZB * t55;
t199 = ZA * t103;
t201 = t198 * t199 * t15;
t204 = 0.2e1 * t7 * t128 - 0.2e1 * t131 * t133 - 0.2e1 * t131 * t137 + 0.16e2 * t142 * t143 - t147 * t148 * t149 + 0.8e1 * t153 * t155 - 0.4e1 * t7 * t160 + 0.2e1 * t7 * t164 + 0.10e2 * t102 * t40 + 0.16e2 * t170 * t174 + 0.2e1 * t83 * t178 - 0.2e1 * t181 * t182 * t65 - t111 * t187 - 0.2e1 * t70 * t87 + 0.4e1 * t102 * t160 - 0.2e1 * t131 * t193 - 0.16e2 * t142 * t75 + 0.16e2 * t35 * t201;
t210 = t32 * t22;
t211 = t33 * t55;
t212 = t25 * t38;
t213 = t211 * t212;
t216 = n * nx;
t217 = t22 * t25;
t222 = ZB * t85 * t16;
t226 = t23 * t30;
t227 = t13 * t10;
t228 = t148 * t227;
t233 = t37 * t163;
t237 = n * t4 * t3;
t238 = t148 * t74;
t241 = t64 * t86;
t245 = t148 * xc * t15;
t248 = t112 * t118;
t250 = t22 * t36;
t256 = 0.3141592654e1 * t25;
t257 = t256 * t39;
t262 = t38 * t103;
t263 = t37 * t262;
t267 = t148 * t17 * xc;
t270 = -0.6e1 * t7 * t143 - 0.4e1 * t24 * t19 - 0.8e1 * t210 * t213 - 0.2e1 * t216 * t217 * t15 - 0.32e2 * t153 * t211 * t222 + 0.4e1 * t226 * t228 + 0.16e2 * t142 * t201 + 0.2e1 * t7 * t233 - 0.4e1 * t237 * t238 - 0.2e1 * t83 * t241 - 0.2e1 * t237 * t245 + t111 * t248 + 0.2e1 * t216 * t250 * t15 - 0.2e1 * t131 * t125 - 0.4e1 * t226 * t257 + t147 * t148 * t95 - 0.2e1 * t102 * t263 + 0.2e1 * t237 * t267;
t273 = t37 * t149;
t277 = t47 * t104 * t13;
t285 = t31 * t36;
t286 = t44 * t285;
t291 = t25 * t123 * t9;
t304 = 0.3141592654e1 * xc;
t305 = t304 * t212;
t312 = t256 * t18;
t315 = t8 * t60;
t319 = t54 * t30 * t58;
t323 = t90 * t36;
t324 = t44 * t323;
t325 = t55 * t58;
t326 = t325 * t60;
t329 = 0.2e1 * t102 * t164 + 0.2e1 * t83 * t273 - 0.4e1 * t102 * t277 - 0.2e1 * t7 * t263 + 0.4e1 * t24 * t8 * t17 - 0.4e1 * t286 * t154 * t60 - 0.2e1 * t131 * t291 - t147 * t148 * t119 + 0.2e1 * t24 * t78 * t17 + 0.2e1 * t54 * t85 * 0.3141592654e1 * ZA * ZB - 0.4e1 * t226 * t305 - 0.2e1 * t70 * t66 + t147 * t256 * t95 + 0.4e1 * t237 * t312 + 0.2e1 * t111 * t315 - 0.8e1 * t319 * t96 - t111 * t193 - 0.8e1 * t324 * t326;
t332 = t8 * t95;
t335 = t136 * t85;
t337 = t256 * t227;
t340 = t177 * t119;
t346 = t37 * t86;
t351 = t103 * t15;
t352 = t177 * t351;
t355 = t64 * t119;
t358 = t8 * t227;
t361 = t85 * 0.3141592654e1;
t365 = t84 * t39;
t372 = ZB * t10;
t373 = t372 * t38;
t374 = t47 * t373;
t379 = t177 * t39;
t384 = -0.2e1 * t46 * t332 + t111 * t335 + 0.4e1 * t237 * t337 - 0.2e1 * t83 * t340 + 0.16e2 * t286 * t211 * t95 + 0.2e1 * t70 * t346 - 0.8e1 * t170 * t61 - 0.8e1 * t142 * t352 - 0.2e1 * t83 * t355 - 0.4e1 * t24 * t358 + 0.2e1 * t147 * t361 * t8 + 0.8e1 * t35 * t365 - 0.2e1 * t226 * t267 + 0.8e1 * t102 * t115 - 0.12e2 * t102 * t374 + 0.16e2 * t142 * t40 - 0.8e1 * t142 * t379 + 0.4e1 * t237 * t228;
t386 = t54 * t30 * t93;
t387 = ZA * t85;
t389 = t171 * t387 * t16;
t394 = t64 * t60;
t398 = t304 * t25 * t15;
t401 = t361 * t25;
t405 = t84 * t65;
t410 = t148 * t18;
t414 = t25 * t16 * t9;
t417 = t84 * t74;
t422 = t177 * t86;
t428 = ZB * t38;
t429 = t47 * t428;
t432 = t148 * t39;
t439 = 0.16e2 * t386 * t389 - 0.16e2 * t386 * t174 + 0.8e1 * t46 * t394 + 0.2e1 * t237 * t398 - t147 * t401 + 0.4e1 * t7 * t374 + 0.2e1 * t83 * t405 - 0.4e1 * t46 * t241 - 0.4e1 * t226 * t410 + 0.2e1 * t131 * t414 + 0.8e1 * t35 * t417 - 0.8e1 * t142 * t365 + 0.2e1 * t70 * t422 - 0.4e1 * t181 * t182 * t60 + 0.12e2 * t102 * t429 - 0.4e1 * t226 * t432 + 0.32e2 * t35 * t374 - 0.4e1 * t7 * t106;
t442 = t36 * t9 * t118;
t444 = t123 * t9;
t445 = t8 * t444;
t448 = t361 * t36;
t451 = t47 * t372 * t17;
t454 = t94 * t60;
t457 = t25 * t103;
t465 = t47 * t372 * t15;
t468 = t36 * t85;
t469 = t468 * t16;
t474 = t43 * t85;
t478 = t8 * t74;
t484 = t256 * t74;
t489 = t198 * ZA * t10 * t15;
t501 = -t111 * t442 + 0.4e1 * t131 * t445 - t147 * t448 + 0.4e1 * t7 * t451 + 0.8e1 * t92 * t454 - 0.2e1 * t24 * t457 * t13 - 0.2e1 * t286 * t211 * t65 + 0.4e1 * t7 * t465 + t111 * t469 - 0.2e1 * t216 * t250 * t17 - 0.2e1 * t216 * t474 * t25 - 0.4e1 * t24 * t478 + 0.4e1 * t24 * t8 * t38 + 0.4e1 * t226 * t484 - 0.16e2 * t142 * t489 - 0.2e1 * t24 * t212 * t103 - 0.2e1 * t216 * t22 * t17 * t25 + 0.2e1 * t70 * t120;
t504 = t33 * t36 * t55 * t38;
t507 = t37 * t18;
t512 = t47 * ZB * t13 * t10;
t518 = t59 * t95;
t530 = t84 * t351;
t534 = t37 * t227;
t549 = -0.8e1 * t210 * t504 + 0.2e1 * t102 * t507 + 0.4e1 * t7 * t512 + t111 * t133 - 0.16e2 * t35 * t489 + 0.8e1 * t170 * t518 + 0.2e1 * t24 * t36 * t13 * t10 + 0.4e1 * t131 * t387 * ZB + 0.12e2 * t102 * t465 - 0.8e1 * t142 * t530 + t111 * t291 - 0.2e1 * t102 * t534 - 0.4e1 * t70 * t394 - 0.10e2 * t102 * t128 + 0.4e1 * t237 * t305 + 0.8e1 * t102 * t19 + 0.2e1 * t83 * t346 - 0.16e2 * t35 * t128;
t557 = t468 * t118;
t562 = t93 * t58;
t563 = t562 * t60;
t567 = t44 * t90 * t93;
t575 = ZA * t55;
t576 = t575 * t428;
t583 = t37 * t60;
t590 = t140 * t3;
t601 = -0.2e1 * t226 * t398 - 0.2e1 * t70 * t340 - 0.2e1 * t131 * t557 - 0.4e1 * t24 * t115 + 0.8e1 * t324 * t563 + 0.16e2 * t567 * t389 + 0.16e2 * t70 * t84 * t95 + 0.2e1 * t70 * t178 - 0.16e2 * t142 * t576 - 0.4e1 * t237 * t257 - 0.4e1 * t226 * t312 + 0.8e1 * t46 * t583 + 0.2e1 * t24 * t36 * t38 * t103 + 0.8e1 * t590 * t213 + 0.2e1 * t102 * t143 - 0.16e2 * t35 * t143 + 0.2e1 * t131 * t248 + 0.4e1 * t46 * t346;
t604 = n * t36;
t606 = t154 * t95;
t625 = t36 * t103;
t640 = t30 * t36;
t641 = t54 * t640;
t642 = t325 * t95;
t647 = -0.4e1 * t131 * t315 - 0.4e1 * t54 * t604 * t606 - t147 * t148 * t60 + 0.16e2 * t35 * t576 - 0.8e1 * t102 * t478 + 0.32e2 * t142 * t465 - 0.4e1 * t237 * t484 - 0.2e1 * t70 * t355 + 0.2e1 * t70 * t273 + 0.2e1 * t102 * t233 - 0.2e1 * t24 * t625 * t13 - 0.8e1 * t7 * t358 - 0.2e1 * t111 * t445 - 0.4e1 * t7 * t429 + 0.16e2 * t46 * t47 * t222 + 0.2e1 * t131 * t113 + 0.8e1 * t641 * t642 - 0.2e1 * t7 * t534;
t652 = t36 * t16;
t653 = t652 * t9;
t655 = t64 * t227;
t658 = t182 * t95;
t663 = t562 * t95;
t684 = t64 * t351;
t689 = t36 * t10;
t695 = t154 * t222;
t698 = -0.4e1 * t216 * t217 * t38 - t111 * t653 - 0.2e1 * t7 * t655 - 0.4e1 * t181 * t658 + 0.2e1 * t131 * t469 - 0.8e1 * t641 * t663 - 0.4e1 * t83 * t583 - 0.2e1 * t83 * t177 * t65 - 0.4e1 * t24 * t457 * t15 + 0.16e2 * t70 * t84 * t60 + 0.8e1 * t57 * t518 - 0.32e2 * t142 * t374 + 0.4e1 * t24 * t8 * t351 + 0.4e1 * t102 * t684 - t147 * t256 * t86 - 0.2e1 * t24 * t689 * t15 - 0.2e1 * t70 * t241 + 0.8e1 * t153 * t695;
t711 = t575 * t373;
t717 = t304 * t17 * t25;
t736 = t177 * t74;
t739 = 0.2e1 * t226 * t245 - 0.8e1 * t102 * t358 - 0.16e2 * t57 * t389 - 0.2e1 * t102 * t655 + 0.8e1 * t590 * t504 - 0.8e1 * t641 * t326 - 0.16e2 * t35 * t711 - t111 * t557 + t111 * t137 - 0.2e1 * t226 * t717 + 0.8e1 * t102 * t37 * t351 + 0.2e1 * t131 * t335 - 0.4e1 * t131 * t332 - 0.2e1 * t216 * t474 * t36 - 0.2e1 * t111 * t332 + 0.16e2 * t142 * t711 - t147 * t256 * t60 + 0.8e1 * t142 * t736;
t750 = t64 * t262;
t763 = t44 * t640;
t770 = t84 * t119;
t782 = 0.4e1 * t102 * t512 + 0.8e1 * t142 * t417 + 0.8e1 * t641 * t563 - 0.2e1 * t7 * t507 + 0.2e1 * t7 * t750 - 0.8e1 * t35 * t352 + 0.4e1 * t237 * t410 + 0.4e1 * t7 * t684 - 0.2e1 * t46 * t445 + t147 * t148 * t65 + 0.4e1 * t763 * t304 * t119 + 0.16e2 * t70 * t177 * t60 + 0.2e1 * t70 * t770 - t111 * t414 - 0.16e2 * t567 * t174 - 0.4e1 * t46 * t71 - 0.4e1 * t46 * t355 - 0.4e1 * t7 * t277;
t797 = t64 * t149;
t821 = -t54 * t448 + 0.2e1 * t131 * t442 + 0.8e1 * t7 * t478 + 0.8e1 * t35 * t379 - 0.2e1 * t181 * t182 * t149 + 0.2e1 * t70 * t405 + 0.2e1 * t83 * t770 - 0.2e1 * t70 * t797 - 0.6e1 * t7 * t75 - 0.4e1 * t286 * t606 - 0.4e1 * t237 * t432 + t147 * t256 * t149 - 0.4e1 * t763 * t304 * t149 - 0.2e1 * t102 * t75 + 0.2e1 * t237 * t717 + 0.8e1 * t324 * t642 - 0.16e2 * t170 * t389 + 0.2e1 * t83 * t422;
t827 = t84 * t149;
t846 = t54 * n * ZA;
t854 = t64 * t18;
t867 = -0.16e2 * t142 * t128 + 0.32e2 * t35 * t465 - 0.2e1 * t83 * t827 + 0.2e1 * t46 * t315 + t147 * t148 * t86 - 0.4e1 * t102 * t451 - 0.8e1 * t226 * t148 * xc * t38 - 0.2e1 * t24 * t689 * t38 + 0.2e1 * t131 * t187 + 0.8e1 * t846 * t155 + 0.8e1 * t35 * t736 + 0.2e1 * t24 * t689 * t17 - 0.2e1 * t7 * t854 + t147 * t256 * t119 + 0.2e1 * t102 * t854 - 0.8e1 * t35 * t530 + 0.4e1 * t46 * t797 + 0.2e1 * t102 * t750;
t909 = -0.8e1 * t324 * t663 + t147 * t256 * t444 - t147 * t256 * t65 + 0.4e1 * t226 * t238 + 0.2e1 * t7 * t40 - t54 * t401 + 0.16e2 * t57 * t174 + 0.4e1 * t226 * t337 + 0.4e1 * t24 * t8 * t163 + 0.8e1 * t846 * t695 + 0.8e1 * t319 * t454 + 0.2e1 * t131 * t653 - 0.8e1 * t46 * t64 * t95 + 0.6e1 * t24 * t78 * t15 - 0.4e1 * t44 * t31 * xc * t658 - 0.32e2 * t153 * t211 * t49 - 0.2e1 * t70 * t827 + t147 * t148 * t444;
t914 = t25 * ZB;
t915 = t33 * t914;
t919 = t4 * t4;
t920 = t16 * t919;
t929 = t123 * t90;
t932 = t919 * t103;
t935 = t33 * ZB;
t939 = t652 * t919;
t942 = t16 * t30;
t943 = t942 * t4;
t949 = t103 * t16;
t950 = t949 * t90;
t953 = -0.2e1 * t915 * t103 * t90 + 0.2e1 * t915 * t920 - 0.2e1 * t915 * t123 * t919 + 0.2e1 * t915 * t16 * t90 - 0.2e1 * t915 * t929 - 0.2e1 * t915 * t932 - 0.2e1 * t935 * t323 * t123 + 0.2e1 * t935 * t939 + 0.4e1 * t915 * t943 + 0.4e1 * t182 * t172 * t90 + 0.2e1 * t915 * t950;
t954 = t171 * t36;
t955 = t90 * n;
t956 = xc * t955;
t957 = t118 * t10;
t964 = t33 * t33;
t965 = t964 * ZB;
t966 = t965 * t640;
t967 = t10 * t919;
t968 = t55 * t16;
t969 = t967 * t968;
t972 = t935 * t36;
t974 = t103 * t30 * t4;
t977 = xc * t16;
t978 = t967 * t977;
t981 = t90 * t30;
t983 = t16 * t10;
t987 = t182 * ZA;
t988 = t4 * t10;
t992 = t171 * t604;
t993 = xc * t14;
t994 = t932 * t993;
t997 = t182 * t30;
t1005 = t171 * t285;
t1006 = t988 * t993;
t1009 = t58 * t914;
t1010 = t1009 * t31;
t1013 = 0.8e1 * t954 * t956 * t957 + 0.2e1 * t915 * t932 * t16 + 0.32e2 * t966 * t969 - 0.4e1 * t972 * t974 - 0.32e2 * t966 * t978 + 0.32e2 * t965 * t981 * t177 * t983 - 0.32e2 * t987 * t942 * t988 + 0.8e1 * t992 * t994 + 0.8e1 * t997 * t949 * ZA * t4 - 0.2e1 * t935 * t124 * t919 - 0.16e2 * t1005 * t1006 + 0.16e2 * t1010 * t1006;
t1015 = t964 * t25;
t1016 = ZA * t30;
t1017 = t1015 * t1016;
t1020 = t967 * t993;
t1031 = t1009 * t118;
t1032 = t31 * t10;
t1040 = t964 * t914;
t1041 = t1040 * t90;
t1044 = t55 * t10 * t4 * t16;
t1047 = t1040 * t30;
t1050 = t123 * ZA;
t1054 = t977 * t988;
t1057 = 0.64e2 * t1017 * t978 - 0.8e1 * t992 * t1020 + 0.2e1 * t972 * t950 + 0.4e1 * t182 * t929 * ZA + 0.4e1 * t182 * t199 * t90 - 0.16e2 * t1031 * t1032 * t4 * xc + 0.4e1 * t182 * t172 * t919 + 0.64e2 * t1041 * t1044 + 0.32e2 * t1047 * t969 + 0.4e1 * t182 * t1050 * t919 - 0.64e2 * t1041 * t1054;
t1058 = t1009 * n;
t1063 = t932 * ZA;
t1069 = t123 * t30 * t4;
t1080 = t993 * t103 * t4;
t1088 = t935 * t103;
t1094 = -0.8e1 * t1058 * t994 - 0.32e2 * t1047 * t978 + 0.4e1 * t182 * t1063 - 0.4e1 * t915 * t974 - 0.4e1 * t915 * t1069 - 0.2e1 * t935 * t625 * t90 - 0.8e1 * t1009 * t10 * t14 * t955 - 0.16e2 * t1010 * t1080 - 0.2e1 * t935 * t625 * t919 - 0.64e2 * t1017 * t969 + 0.2e1 * t1088 * t939 + 0.8e1 * t1009 * t957 * t955;
t1113 = t955 * t118 * xc;
t1120 = t4 * t118;
t1125 = t981 * xc;
t1133 = n * t10;
t1140 = -0.8e1 * t954 * t955 * t10 * t993 + 0.2e1 * t935 * t652 * t90 - 0.64e2 * t1015 * t981 * t575 * t983 + 0.8e1 * t182 * t103 * t1016 * t4 + 0.8e1 * t1009 * t1113 + 0.16e2 * t954 * t1032 * t4 * t14 - 0.16e2 * t954 * t1032 * t1120 + 0.64e2 * t1015 * t10 * t172 * t1125 + 0.8e1 * t171 * t103 * t136 * t956 - 0.8e1 * t1031 * t1133 * t919 * xc + 0.8e1 * t1058 * t1020;
t1153 = xc * t118;
t1165 = t182 * t16;
t1170 = t171 * t10;
t1178 = ZA * t90;
t1182 = 0.4e1 * t1088 * t652 * t140 + 0.8e1 * t954 * t1133 * t919 * t14 + 0.4e1 * t972 * t943 - 0.4e1 * t972 * t1069 - 0.16e2 * t954 * t31 * t4 * t1153 - 0.8e1 * t954 * n * t919 * t1153 - 0.8e1 * t954 * t1133 * t919 * t118 + 0.4e1 * t1165 * t1063 + 0.16e2 * t1005 * t1080 - 0.8e1 * t1170 * t118 * t36 * t955 - 0.16e2 * t987 * t920 * t10 - 0.16e2 * t1165 * t1178 * t10;
t1195 = t1040 * t981;
t1199 = t1009 * t955;
t1203 = t1009 * t10;
t1211 = t965 * t323;
t1225 = -0.32e2 * t965 * t10 * t652 * t1125 + 0.4e1 * t915 * t16 * t974 + 0.4e1 * t182 * t90 * t949 * ZA + 0.32e2 * t1195 * t968 * t10 - 0.8e1 * t1199 * t993 * t103 + 0.8e1 * t1203 * t118 * n * t919 + 0.8e1 * t1170 * t136 * t955 + 0.64e2 * t1211 * t1044 + 0.16e2 * t1031 * t1032 * t4 + 0.8e1 * t987 * t943 + 0.8e1 * t1199 * t993 * t10 + 0.8e1 * t997 * t1050 * t4;
t1263 = -0.128e3 * t1015 * t1178 * t1044 + 0.16e2 * t1005 * t988 * t1153 + 0.8e1 * t1058 * t1153 * t919 + 0.16e2 * t1010 * t1120 * xc - 0.8e1 * t954 * t1113 - 0.8e1 * t1203 * t14 * n * t919 - 0.16e2 * t1203 * t14 * t31 * t4 - 0.8e1 * t1203 * t1113 - 0.32e2 * t1195 * t977 * t10 - 0.64e2 * t1211 * t1054 + 0.8e1 * t992 * t967 * t1153 + 0.128e3 * t1015 * t983 * t90 * t4 * t47;

C1B = (t127 + t204 + t270 + t329 + t384 + t439 + t501 + t549 + t601 + t647 + t698 + t739 + t782 + t821 + t867 + t909) / (t953 + t1013 + t1057 + t1094 + t1140 + t1182 + t1225 + t1263);
%**************************************************************************************%
t1 = n * n;
t2 = t1 * n;
t3 = nx * t2;
t4 = 0.3141592654e1 * ZA;
t5 = t3 * t4;
t6 = nx * 0.3141592654e1;
t7 = t6 * xc;
t8 = sin(t7);
t9 = t8 * ZB;
t10 = n * 0.3141592654e1;
t11 = exp(t10);
t12 = t11 * t11;
t15 = exp(xc * n * 0.3141592654e1);
t16 = t15 * t15;
t17 = t16 * t16;
t18 = t17 * t15;
t19 = t12 * t18;
t23 = t1 * t1;
t24 = nx * t23;
t25 = ZB * ZB;
t27 = t18 * t8;
t28 = 0.3141592654e1 * 0.3141592654e1;
t29 = xc * xc;
t30 = t28 * t29;
t34 = t1 * xc;
t35 = 0.3141592654e1 * ZB;
t36 = t34 * t35;
t37 = cos(t7);
t38 = ZA * t37;
t39 = nx * nx;
t40 = t39 * t12;
t41 = t16 * t15;
t43 = t38 * t40 * t41;
t46 = t25 * n;
t47 = t46 * 0.3141592654e1;
t48 = t39 * nx;
t49 = sin(t6);
t50 = t48 * t49;
t51 = t12 * t11;
t52 = t51 * t17;
t53 = t50 * t52;
t56 = t34 * 0.3141592654e1 * t25;
t57 = t37 * t39;
t58 = t17 * t41;
t59 = t12 * t58;
t60 = t57 * t59;
t63 = t25 * t18;
t64 = t57 * n;
t67 = ZA * ZA;
t68 = t67 * n;
t69 = 0.3141592654e1 * t48;
t70 = t68 * t69;
t71 = t49 * xc;
t72 = t17 * t16;
t73 = t11 * t72;
t74 = t71 * t73;
t77 = t1 * t67;
t78 = t77 * 0.3141592654e1;
t81 = nx * t25;
t82 = t81 * t49;
t83 = t17 * t17;
t85 = t1 * t83 * t11;
t87 = nx * ZB;
t88 = t8 * t2;
t89 = t87 * t88;
t90 = 0.3141592654e1 * xc;
t91 = t12 * t12;
t92 = ZA * t91;
t97 = ZB * ZA;
t98 = t97 * t37;
t99 = t39 * n;
t100 = t12 * t41;
t104 = 0.8e1 * t5 * t9 * t19 + 0.8e1 * t24 * t25 * t27 * t30 + 0.12e2 * t36 * t43 - t47 * t53 - 0.2e1 * t56 * t60 - 0.4e1 * t63 * t64 + 0.6e1 * t70 * t74 + 0.4e1 * t78 * t60 - t82 * t85 + 0.4e1 * t89 * t90 * t92 * t41 + 0.4e1 * t98 * t99 * t100;
t105 = t67 * t48;
t106 = t49 * t51;
t107 = t106 * t72;
t109 = t1 * 0.3141592654e1;
t110 = t109 * xc;
t115 = nx * t67;
t116 = t115 * t49;
t117 = t1 * t16;
t118 = t117 * t11;
t120 = t2 * t25;
t121 = t28 * 0.3141592654e1;
t122 = t121 * t29;
t123 = t120 * t122;
t129 = t1 * ZB;
t130 = t129 * t4;
t131 = t57 * t100;
t134 = t12 * t16;
t136 = t109 * t39;
t139 = ZB * t18;
t141 = t39 * t1;
t142 = t141 * t90;
t145 = t77 * t90;
t146 = t91 * t41;
t147 = t57 * t146;
t151 = t25 * t39 * t1;
t152 = t72 * t12;
t156 = t49 * t2;
t158 = t83 * t11;
t162 = -t105 * t107 + 0.8e1 * t110 * t72 * t25 * t39 - t116 * t118 + 0.8e1 * t123 * t53 + 0.8e1 * t5 * t9 * t59 - 0.8e1 * t130 * t131 - 0.8e1 * t134 * t25 * t136 - 0.12e2 * t139 * t38 * t142 - 0.8e1 * t145 * t147 - 0.8e1 * t151 * t90 * t152 - 0.2e1 * t87 * t156 * t4 * t158;
t164 = t115 * t88;
t165 = t90 * t19;
t168 = t25 * t48;
t169 = t49 * t16;
t170 = t169 * t11;
t174 = ZA * n * t69;
t175 = ZB * t51;
t176 = t175 * t17;
t177 = t71 * t176;
t180 = t1 * t29;
t181 = t28 * t25;
t182 = t180 * t181;
t183 = t50 * t73;
t186 = ZA * t1;
t187 = t28 * t48;
t188 = t186 * t187;
t189 = ZB * t17;
t190 = t189 * t11;
t191 = t71 * t190;
t194 = t50 * t158;
t196 = t115 * t156;
t197 = t90 * t73;
t201 = t49 * t17 * t11;
t204 = t88 * t90;
t207 = t68 * 0.3141592654e1;
t208 = t17 * t11;
t209 = t50 * t208;
t211 = -0.2e1 * t164 * t165 - t168 * t170 + t168 * t107 + 0.8e1 * t174 * t177 + 0.2e1 * t182 * t183 + 0.8e1 * t188 * t191 + t47 * t194 - 0.6e1 * t196 * t197 - t168 * t201 - 0.4e1 * t81 * t18 * t204 - t207 * t209;
t212 = t2 * 0.3141592654e1;
t213 = t212 * t52;
t215 = t81 * t8;
t216 = t212 * t59;
t219 = t3 * t90;
t220 = t25 * t8;
t221 = t18 * t91;
t225 = t71 * t52;
t231 = t16 * t51;
t232 = t50 * t231;
t237 = ZA * t12;
t243 = t67 * t28;
t244 = t24 * t243;
t245 = t71 * t231;
t249 = -t116 * t213 - 0.4e1 * t215 * t216 + 0.2e1 * t219 * t220 * t221 - 0.4e1 * t70 * t225 + 0.4e1 * t98 * t99 * t146 + t47 * t232 - 0.2e1 * t145 * t57 * t221 + 0.4e1 * t89 * t90 * t237 * t41 - t105 * t201 - 0.6e1 * t244 * t245 + t105 * t170;
t252 = t25 * t37;
t253 = t252 * t39;
t255 = n * t15 * t12;
t258 = t2 * t29;
t259 = ZB * t28;
t260 = t258 * t259;
t263 = t106 * t17;
t265 = xc * t25;
t269 = t25 * t49;
t270 = t269 * t52;
t273 = t1 * t25;
t274 = t273 * 0.3141592654e1;
t275 = t57 * t19;
t278 = t24 * t30;
t288 = t1 * t11 * t72;
t290 = t212 * t208;
t292 = t2 * xc;
t296 = 0.2e1 * t253 * t255 + 0.16e2 * t260 * t43 + t105 * t263 - 0.4e1 * t10 * t265 * t53 + 0.4e1 * t219 * t270 - 0.12e2 * t274 * t275 + 0.8e1 * t278 * t270 - 0.2e1 * ZB * n * t69 * t49 * ZA * t158 - t82 * t288 - t116 * t290 + 0.16e2 * t292 * t243 * t275;
t301 = t50 * t176;
t304 = t51 * t72;
t305 = t71 * t304;
t308 = t25 * t41;
t311 = ZA * t48;
t312 = t311 * t49;
t317 = t91 * t15;
t318 = t57 * t317;
t321 = t81 * t88;
t322 = t90 * t59;
t325 = t212 * t231;
t327 = t15 * t12;
t328 = t57 * t327;
t331 = t77 * t187;
t334 = t2 * ZA;
t335 = t334 * t122;
t336 = t50 * t190;
t339 = 0.8e1 * t151 * t90 * t134 + 0.16e2 * t186 * t30 * t301 - 0.2e1 * t70 * t305 + 0.2e1 * t308 * t64 - 0.2e1 * t312 * ZB * t83 * t11 + 0.2e1 * t56 * t318 + 0.2e1 * t321 * t322 - t116 * t325 - 0.4e1 * t274 * t328 + 0.2e1 * t331 * t305 - 0.16e2 * t335 * t336;
t341 = t169 * t51;
t344 = t49 * t11 * t72;
t346 = t77 * t30;
t347 = t50 * t304;
t350 = t25 * t51;
t352 = nx * ZA;
t353 = t49 * t23;
t354 = t352 * t353;
t355 = t28 * xc;
t362 = t25 * t91;
t365 = t23 * n;
t366 = nx * t365;
t367 = t366 * t122;
t368 = ZB * t49;
t369 = ZA * t51;
t370 = t369 * t17;
t371 = t368 * t370;
t374 = t115 * t353;
t375 = t355 * t73;
t381 = t105 * t341 - t105 * t344 - 0.2e1 * t346 * t347 - t350 * t50 - 0.8e1 * t354 * t355 * t176 - 0.4e1 * t98 * t99 * t317 - 0.2e1 * t362 * t99 - 0.16e2 * t367 * t371 + 0.6e1 * t374 * t375 - 0.8e1 * t182 * t53 - t82 * t290;
t382 = t71 * t208;
t394 = t2 * t67;
t395 = t394 * t122;
t398 = t352 * t156;
t402 = t17 * t12;
t403 = t39 * ZA;
t404 = t402 * t403;
t407 = t269 * t208;
t411 = t49 * t83 * t11;
t413 = t46 * t69;
t419 = -0.4e1 * t331 * t382 + 0.2e1 * t115 * t58 * t204 - 0.2e1 * t145 * t60 + 0.12e2 * t274 * t131 + 0.2e1 * t346 * t232 + 0.8e1 * t395 * t53 - 0.8e1 * t398 * t90 * t176 - 0.64e2 * t260 * t404 + 0.4e1 * t219 * t407 + t168 * t411 - 0.6e1 * t413 * t74 - 0.2e1 * t110 * t308 * t57;
t424 = t16 * t11;
t425 = t212 * t424;
t427 = t258 * t181;
t430 = t67 * t29;
t431 = t366 * t430;
t432 = t121 * t49;
t433 = t432 * t52;
t436 = n * t12;
t437 = t436 * t18;
t440 = t29 * xc;
t441 = t440 * t121;
t442 = t394 * t441;
t445 = t67 * t37;
t446 = t445 * t39;
t448 = n * t18 * t91;
t453 = t352 * t49;
t458 = t8 * t23;
t462 = t81 * t458;
t463 = t30 * t19;
t466 = -t47 * t209 + t116 * t425 - 0.8e1 * t427 * t275 + 0.8e1 * t431 * t433 - 0.2e1 * t253 * t437 - 0.8e1 * t442 * t53 - 0.2e1 * t446 * t448 + 0.2e1 * t175 * t312 + 0.6e1 * t453 * t129 * t208 + 0.8e1 * t115 * t18 * t458 * t30 + 0.8e1 * t462 * t463;
t470 = t436 * t58;
t475 = t2 * t121 * t440 * t25;
t485 = t212 * t73;
t488 = t67 * t72 * t1;
t490 = t39 * xc;
t501 = 0.4e1 * t374 * t355 * t52 + 0.2e1 * t446 * t470 - 0.8e1 * t475 * t53 - 0.2e1 * t446 * t437 - 0.4e1 * t36 * t38 * t39 * t15 * t12 - t116 * t485 + 0.8e1 * t488 * 0.3141592654e1 * t12 * t490 - t207 * t183 - 0.2e1 * t182 * t232 - 0.6e1 * t413 * t245 - 0.4e1 * t413 * t382;
t503 = t115 * t8;
t510 = t355 * t19;
t513 = t432 * t208;
t525 = t38 * t40 * t18;
t533 = -0.4e1 * t503 * t216 - 0.4e1 * t89 * t90 * t92 * t15 - 0.16e2 * t462 * t510 + 0.8e1 * t431 * t513 - 0.4e1 * t78 * t131 + t47 * t183 - 0.2e1 * t67 * t83 * t99 + 0.4e1 * t331 * t225 + 0.16e2 * t260 * t525 - 0.4e1 * t89 * t90 * t237 * t58 - t207 * t53;
t536 = t28 * t37;
t538 = t490 * t100;
t541 = t334 * t441;
t547 = t394 * t30;
t550 = t212 * t19;
t553 = t366 * t441;
t556 = n * t17;
t571 = -0.8e1 * t427 * t131 + 0.16e2 * t394 * t536 * t538 + 0.16e2 * t541 * t336 + 0.2e1 * t453 * t129 * t158 - 0.8e1 * t547 * t147 + 0.4e1 * t503 * t550 - 0.8e1 * t553 * t270 + 0.4e1 * t556 * ZB * t92 * t39 - 0.2e1 * t67 * t91 * t99 - t82 * t425 + 0.4e1 * t78 * t275 + 0.2e1 * t78 * xc * t41 * t57;
t583 = t90 * t317;
t594 = t212 * t158;
t596 = t152 * t67;
t602 = t67 * t17;
t607 = 0.8e1 * t367 * t407 - 0.4e1 * t98 * t99 * t59 + 0.16e2 * t260 * t18 * ZA * t57 + 0.2e1 * t321 * t583 - 0.6e1 * t174 * t368 * t52 - 0.4e1 * t89 * t90 * ZA * t15 * t12 + t116 * t594 - 0.8e1 * t596 * t136 - 0.4e1 * t98 * t99 * t327 + 0.2e1 * t602 * t99 + 0.2e1 * t164 * t583;
t613 = t83 * t25;
t616 = t81 * t156;
t627 = t90 * t231;
t630 = t91 * t16;
t638 = 0.4e1 * t196 * t90 * t208 - 0.8e1 * t130 * t60 - 0.2e1 * t613 * t99 + 0.6e1 * t616 * t197 - 0.8e1 * t547 * t131 + 0.8e1 * t67 * t18 * t37 * t142 + 0.2e1 * t145 * t328 - 0.6e1 * t196 * t627 + 0.8e1 * t630 * t67 * t142 - 0.8e1 * t547 * t275 + 0.8e1 * t395 * t209;
t643 = t77 * t355;
t648 = t115 * t458;
t651 = t134 * t67;
t657 = t30 * t304;
t660 = t30 * t146;
t665 = t25 * t17;
t668 = t50 * t424;
t671 = -0.4e1 * t321 * t90 * t146 - 0.6e1 * t643 * t232 + 0.8e1 * t182 * t209 - 0.16e2 * t648 * t510 + 0.8e1 * t651 * t136 + 0.8e1 * t89 * t4 * t100 - 0.2e1 * t374 * t657 - 0.8e1 * t648 * t660 + 0.8e1 * t130 * t328 + 0.2e1 * t665 * t99 + 0.2e1 * t346 * t668;
t672 = t90 * t424;
t676 = t120 * t536;
t680 = t436 * t41;
t688 = t366 * t67 * t440;
t696 = xc * t12;
t697 = t696 * t18;
t701 = t252 * t141;
t702 = t90 * t221;
t705 = 0.2e1 * t196 * t672 - t47 * t347 + 0.16e2 * t676 * t538 - t116 * t85 - 0.2e1 * t253 * t680 + t207 * t194 + 0.4e1 * t98 * t99 * t19 - 0.8e1 * t688 * t433 + 0.16e2 * t541 * t301 - 0.6e1 * t312 * t190 + 0.4e1 * t352 * t88 * t35 * t697 + 0.2e1 * t701 * t702;
t712 = t24 * t430;
t713 = t28 * t49;
t721 = t1 * t17 * t11;
t726 = ZB * xc;
t737 = n * t91;
t741 = 0.8e1 * t346 * t209 + 0.2e1 * t712 * t713 * t424 + 0.8e1 * t130 * t275 - t47 * t668 + t116 * t721 - 0.8e1 * t688 * t513 + 0.4e1 * t352 * t27 * t212 * t726 + 0.8e1 * t648 * t463 + 0.4e1 * t274 * t60 - 0.4e1 * t374 * t355 * t208 - 0.4e1 * t253 * t737 * t41;
t745 = t269 * t231;
t749 = t1 * t28 * t265;
t757 = t16 * t39;
t758 = t696 * t757;
t762 = t69 * t49;
t772 = t355 * t100;
t775 = t81 * t353;
t778 = -0.8e1 * t398 * t90 * t190 - 0.2e1 * t278 * t745 + 0.4e1 * t749 * t53 + 0.32e2 * t394 * t29 * t28 * t17 * t40 - 0.8e1 * t78 * t758 + t350 * n * t762 - 0.6e1 * t87 * t49 * t186 * t52 - 0.8e1 * t553 * t407 - 0.4e1 * t749 * t209 + 0.16e2 * t648 * t772 - 0.6e1 * t775 * t375;
t790 = t212 * t304;
t793 = t156 * 0.3141592654e1;
t795 = t355 * t304;
t800 = t91 * t39;
t801 = t800 * n;
t807 = t2 * t28;
t808 = t807 * t726;
t811 = -0.2e1 * t616 * t672 - 0.2e1 * t446 * t680 - 0.2e1 * t78 * xc * t58 * t57 + 0.8e1 * t367 * t270 - t82 * t790 + t115 * t51 * t793 - 0.2e1 * t775 * t795 + 0.8e1 * t123 * t209 + 0.2e1 * t665 * t801 - 0.2e1 * t67 * t41 * t64 - 0.32e2 * t808 * t43;
t812 = t117 * t51;
t821 = t24 * t355;
t827 = t90 * t304;
t840 = t800 * t41;
t844 = -t116 * t812 - 0.2e1 * t110 * t25 * t58 * t57 - 0.4e1 * t78 * t328 + t82 * t485 - 0.4e1 * t821 * t407 + 0.4e1 * t196 * t90 * t52 + 0.2e1 * t196 * t827 + t82 * t325 + 0.2e1 * t253 * t448 - 0.32e2 * t402 * t67 * t807 * t490 - t207 * t232 + 0.12e2 * t186 * t90 * ZB * t37 * t840;
t849 = t1 * t51;
t850 = t849 * t17;
t860 = t269 * t424;
t863 = t273 * t187;
t874 = 0.16e2 * t462 * t772 - t116 * t850 + 0.16e2 * t553 * t371 + t116 * t288 - 0.12e2 * t97 * t57 * t109 * t697 + t82 * t594 - 0.2e1 * t278 * t860 - 0.2e1 * t863 * t305 - 0.16e2 * t180 * t259 * t311 * t201 - 0.6e1 * t863 * t74 + 0.8e1 * t174 * t191;
t879 = xc * ZA;
t888 = t67 * t51;
t901 = ZA * t17;
t903 = t368 * t901 * t11;
t908 = -0.2e1 * t352 * t51 * t156 * t35 + 0.64e2 * t879 * t189 * t807 * t40 + 0.2e1 * t46 * t58 * t37 * t39 - t888 * t50 + t105 * t411 - 0.16e2 * t335 * t301 + 0.8e1 * t152 * t25 * t136 - 0.8e1 * t278 * t407 + 0.2e1 * t712 * t713 * t231 - 0.16e2 * t367 * t903 + 0.2e1 * t145 * t318;
t923 = t71 * t424;
t926 = t87 * t458;
t927 = t28 * ZA;
t944 = 0.8e1 * t354 * t355 * t190 - 0.8e1 * t110 * t16 * t25 * t800 - 0.2e1 * t374 * t30 * t73 - 0.16e2 * t354 * t30 * t176 - 0.2e1 * t244 * t923 - 0.32e2 * t926 * t927 * t696 * t41 - 0.32e2 * t808 * t525 + 0.6e1 * t749 * t232 - 0.8e1 * t188 * t177 + 0.4e1 * t36 * t58 * ZA * t57 + 0.4e1 * t821 * t270;
t948 = t90 * t327;
t961 = t30 * t100;
t964 = t29 * t49;
t981 = t106 * t1;
t983 = -0.2e1 * t219 * t220 * t100 + 0.2e1 * t321 * t948 - 0.16e2 * t189 * ZA * t99 * t12 - 0.2e1 * t369 * n * t69 * t368 + 0.2e1 * t374 * t795 - 0.8e1 * t462 * t961 - 0.8e1 * t244 * t964 * t208 + 0.2e1 * t413 * t923 + 0.4e1 * t36 * t38 * t40 * t58 - 0.2e1 * t87 * t51 * t49 * t1 * ZA + t888 * n * t762 + t115 * t981;
t1012 = 0.6e1 * t616 * t627 - t82 * t213 + 0.2e1 * t775 * t657 - 0.12e2 * t215 * t550 - 0.6e1 * t145 * t131 + 0.2e1 * t81 * t41 * t204 + 0.6e1 * ZB * t48 * t49 * t370 - 0.4e1 * t70 * t382 + 0.2e1 * t446 * t255 + 0.8e1 * t89 * t4 * t327 - 0.4e1 * t56 * t147;
t1018 = t212 * t100;
t1029 = t212 * t327;
t1040 = 0.6e1 * t70 * t245 + 0.2e1 * t56 * t328 + t207 * t668 + 0.4e1 * t503 * t1018 + 0.2e1 * t253 * t470 - 0.6e1 * t398 * t35 * t208 - 0.8e1 * t331 * t964 * t52 - 0.4e1 * t503 * t1029 + 0.6e1 * t821 * t745 + 0.4e1 * t63 * t37 * t142 + 0.16e2 * t260 * t38 * t840;
t1068 = t207 * t347 - 0.2e1 * t164 * t702 - 0.2e1 * t331 * t964 * t73 + 0.8e1 * t374 * t30 * t52 + 0.16e2 * t278 * t903 + 0.2e1 * t863 * t923 + 0.6e1 * t445 * t141 * t165 - 0.2e1 * t164 * t90 * t100 + 0.6e1 * t331 * t74 - 0.2e1 * t182 * t668 - 0.2e1 * t115 * t41 * t204;
t1079 = t58 * t8;
t1091 = t807 * t29;
t1092 = t665 * t40;
t1101 = ZB * t91;
t1102 = t403 * n;
t1105 = -0.4e1 * t58 * ZB * ZA * t64 - t82 * t850 + 0.2e1 * t821 * t860 + t81 * t51 * t793 + 0.2e1 * t3 * t25 * t1079 * t90 + t82 * t721 - 0.2e1 * t643 * t668 + 0.16e2 * t926 * t927 * t29 * t91 * t41 + 0.32e2 * t1091 * t1092 - 0.2e1 * t219 * t220 * t19 + 0.4e1 * t139 * ZA * t64 + 0.4e1 * t1101 * t1102;
t1108 = t849 * t72;
t1121 = t737 * t15;
t1124 = t29 * t12;
t1133 = t116 * t1108 - 0.8e1 * t475 * t209 - 0.32e2 * t807 * xc * t1092 + 0.2e1 * t278 * t269 * t73 + t82 * t812 - 0.6e1 * t56 * t131 + 0.2e1 * t253 * t1121 + 0.16e2 * t926 * t927 * t1124 * t41 + t168 * t263 - 0.2e1 * t616 * t827 + t81 * t981;
t1134 = t394 * t28;
t1159 = -0.8e1 * t1134 * t29 * t18 * t57 + t82 * t118 - 0.12e2 * t215 * t1018 + 0.2e1 * t602 * t801 - t168 * t341 + 0.2e1 * t67 * t58 * t64 + t168 * t344 - 0.6e1 * t174 * t368 * t208 + 0.16e2 * t553 * t903 + t116 * t790 - 0.4e1 * t36 * t38 * t800 * t15;
t1161 = n * t83;
t1173 = ZB * t12;
t1196 = 0.4e1 * t1161 * ZB * t39 * ZA - 0.4e1 * t215 * t1029 - 0.8e1 * t488 * 0.3141592654e1 * t39 * xc + 0.32e2 * t821 * ZA * t8 * t1173 * t18 - 0.8e1 * t427 * t147 + 0.6e1 * t701 * t165 - 0.16e2 * t926 * t927 * t1124 * t18 - 0.8e1 * t1091 * t63 * t57 - 0.8e1 * t442 * t209 - 0.8e1 * t462 * t660 - 0.6e1 * t398 * t35 * t52;
t1228 = 0.2e1 * t413 * t305 - 0.8e1 * t648 * t961 - 0.16e2 * t87 * t27 * t23 * t28 * ZA * t29 + 0.4e1 * t189 * t1102 - 0.4e1 * t87 * t1079 * t212 * t879 + 0.2e1 * t164 * t948 - 0.2e1 * t70 * t923 + 0.2e1 * t164 * t322 + 0.2e1 * t446 * t1121 + 0.2e1 * t863 * t964 * t304 - t82 * t1108 + 0.16e2 * t676 * t490 * t19;
t1234 = t25 * ZB;
t1235 = t1234 * t28;
t1236 = t365 * t91;
t1240 = ZB * t121;
t1241 = t1240 * t77;
t1242 = t39 * t39;
t1243 = t12 * t1242;
t1244 = xc * t72;
t1245 = t1243 * t1244;
t1248 = t365 * t25;
t1252 = t243 * n;
t1257 = t23 * t1;
t1258 = t1240 * t1257;
t1259 = t67 * t12;
t1260 = xc * t16;
t1268 = t1234 * t121;
t1269 = t1268 * t23;
t1272 = t1242 * t91;
t1280 = t67 * xc;
t1284 = t28 * t28;
t1285 = t67 * t1284;
t1287 = t1285 * t2 * ZB;
t1288 = t17 * xc;
t1289 = t1243 * t1288;
t1292 = 0.2e1 * t1235 * t1236 * t17 + 0.8e1 * t1241 * t1245 + 0.4e1 * t927 * t1248 * t91 - 0.2e1 * t1252 * ZB * t1242 * t91 - 0.8e1 * t1258 * t1259 * t1260 - 0.4e1 * t1235 * t2 * t83 * t39 + 0.16e2 * t1269 * t758 + 0.2e1 * t1252 * t189 * t1272 - 0.2e1 * t1252 * t83 * t1242 * ZB + 0.8e1 * t1258 * t630 * t1280 - 0.32e2 * t1287 * t1289;
t1293 = t365 * t83;
t1300 = ZA * t1284;
t1304 = t17 * t1242 * t25 * t12;
t1307 = t927 * t2;
t1311 = t23 * t2;
t1312 = t1300 * t1311;
t1316 = t1234 * t1284;
t1317 = t1316 * t1311;
t1321 = t1240 * t23;
t1331 = t1240 * t23 * t67;
t1332 = t40 * t1244;
t1338 = t1243 * t1260;
t1344 = -0.2e1 * t1235 * t1293 - 0.16e2 * t181 * t365 * t901 * t12 - 0.64e2 * t1300 * t258 * t1304 + 0.8e1 * t1307 * t613 * t39 + 0.64e2 * t1312 * t265 * t402 - 0.32e2 * t1317 * t1288 * t12 - 0.16e2 * t1321 * t67 * t39 * t1244 + 0.2e1 * t1235 * n * t1272 * t17 + 0.16e2 * t1331 * t1332 + 0.64e2 * t1300 * t292 * t1304 - 0.8e1 * t1241 * t1338 - 0.2e1 * t243 * t1293 * ZB;
t1346 = t1316 * t2;
t1349 = t927 * n;
t1350 = t25 * t1242;
t1354 = t1268 * t1257;
t1366 = t1268 * t1;
t1370 = t29 * t17;
t1371 = t1243 * t1370;
t1386 = -0.32e2 * t1346 * t1289 + 0.4e1 * t1349 * t1350 * t91 + 0.8e1 * t1354 * t1260 * t12 - 0.16e2 * t181 * n * t901 * t1243 - 0.4e1 * t1235 * t2 * t91 * t39 + 0.8e1 * t1366 * t152 * t1242 + 0.32e2 * t1287 * t1371 + 0.8e1 * t1258 * t1280 * t152 - 0.8e1 * t1354 * t1260 * t91 + 0.128e3 * t1300 * t365 * xc * t1092 + 0.8e1 * t1366 * t1338;
t1387 = t1257 * t12;
t1391 = t1240 * t1;
t1399 = t1272 * t1260;
t1412 = t1285 * t1311;
t1427 = -0.8e1 * t1268 * t1387 * t16 - 0.8e1 * t1391 * t67 * t1242 * t1244 - 0.4e1 * t1134 * t1101 * t39 + 0.8e1 * t1241 * t1399 - 0.8e1 * t1258 * t596 + 0.4e1 * t927 * t1293 * t25 - 0.16e2 * t1331 * t758 + 0.8e1 * t1307 * t665 * t39 + 0.32e2 * t1412 * t1370 * t1173 + 0.8e1 * t1307 * t665 * t800 + 0.8e1 * t1391 * t1259 * t1242 * t16 - 0.8e1 * t1391 * t1259 * t1242 * t72;
t1456 = t365 * ZB;
t1468 = 0.4e1 * t927 * t1248 * t17 - 0.2e1 * t1235 * n * t1242 * t91 + 0.8e1 * t1366 * t1244 * t1242 - 0.16e2 * t1269 * t134 * t39 + 0.8e1 * t1268 * t1257 * t72 * xc + 0.16e2 * t1321 * t1259 * t757 + 0.32e2 * t1317 * t1370 * t12 + 0.4e1 * t1349 * t613 * t1242 + 0.2e1 * t243 * t1456 * t17 - 0.64e2 * t1285 * t365 * t12 * t189 * t490 - 0.8e1 * t1354 * t152 * xc;
t1472 = t1316 * t365;
t1474 = t1124 * t39 * t17;
t1478 = t17 * t91;
t1504 = t72 * t39;
t1511 = 0.4e1 * t1134 * t189 * t800 + 0.64e2 * t1472 * t1474 + 0.4e1 * t1235 * t2 * t1478 * t39 + 0.4e1 * t1349 * t665 * t1242 - 0.8e1 * t1258 * t1280 * t72 + 0.2e1 * t1252 * t189 * t1242 + 0.2e1 * t243 * t365 * t189 * t91 + 0.4e1 * t927 * t365 * t1478 * t25 - 0.128e3 * t1300 * t1248 * t1474 - 0.2e1 * t1235 * t1236 + 0.16e2 * t1269 * t1504 * xc + 0.2e1 * t1235 * t365 * t17;
t1545 = -0.2e1 * t1235 * t1161 * t1242 + 0.4e1 * t1349 * t1350 * t1478 - 0.8e1 * t1366 * t1245 + 0.2e1 * t1235 * t556 * t1242 - 0.32e2 * t1412 * t402 * t726 - 0.8e1 * t1366 * t1399 + 0.8e1 * t1258 * t651 - 0.2e1 * t243 * t1456 * t91 + 0.8e1 * t1268 * t1387 * t72 - 0.16e2 * t1269 * t1332 + 0.4e1 * t1134 * t189 * t39 + 0.16e2 * t1269 * t152 * t39;
t1564 = t1260 * t800;
t1583 = 0.64e2 * t1285 * t1456 * t1474 - 0.64e2 * t1472 * t1288 * t40 - 0.8e1 * t1366 * t134 * t1242 + 0.8e1 * t1307 * t362 * t39 + 0.4e1 * t1235 * t2 * t17 * t39 + 0.32e2 * t1346 * t1371 - 0.16e2 * t1269 * t1564 - 0.16e2 * t1321 * t1259 * t1504 + 0.16e2 * t1331 * t1564 - 0.64e2 * t1312 * t29 * t25 * t402 - 0.4e1 * t1134 * t83 * t39 * ZB - 0.32e2 * t181 * t2 * t404;

C2B = (t1133 + t1196 + t1068 + t811 + t466 + t1012 + t381 + t162 + t249 + t533 + t844 + t104 + t1159 + t571 + t211 + t874 + t607 + t339 + t296 + t638 + t908 + t671 + t419 + t983 + t705 + t1105 + t501 + t778 + t1040 + t1228 + t741 + t944) / (t1292 + t1344 + t1386 + t1427 + t1468 + t1511 + t1545 + t1583);
%**************************************************************************************%
t1 = n * n;
t2 = t1 * n;
t3 = t2 * nx;
t4 = nx * 0.3141592654e1;
t5 = t4 * xc;
t6 = sin(t5);
t7 = 0.3141592654e1 * 0.3141592654e1;
t9 = t3 * t6 * t7;
t10 = xc * xc;
t11 = ZA * ZA;
t12 = t10 * t11;
t13 = n * 0.3141592654e1;
t14 = exp(t13);
t15 = t14 * t14;
t16 = xc * n;
t18 = exp(t16 * 0.3141592654e1);
t19 = t18 * t18;
t20 = t19 * t18;
t21 = t15 * t20;
t22 = t12 * t21;
t25 = nx * t6;
t26 = t1 * 0.3141592654e1;
t27 = t25 * t26;
t28 = ZA * ZB;
t29 = t18 * t15;
t30 = t28 * t29;
t33 = t25 * n;
t34 = t11 * t15;
t35 = t19 * t19;
t36 = t35 * t18;
t40 = t25 * t1;
t41 = 0.3141592654e1 * t11;
t42 = t15 * t36;
t43 = t41 * t42;
t46 = nx * nx;
t47 = t1 * t46;
t48 = t47 * t11;
t49 = t7 * xc;
t50 = t35 * t15;
t51 = t49 * t50;
t55 = sin(t4);
t56 = t46 * nx * t55;
t58 = t56 * n * t7;
t59 = ZB * ZB;
t60 = t10 * t59;
t61 = t15 * t14;
t62 = t19 * t61;
t63 = t60 * t62;
t66 = t19 * t14;
t67 = t60 * t66;
t70 = t28 * t42;
t73 = cos(t5);
t74 = t47 * t73;
t75 = t7 * t11;
t77 = t75 * t10 * t36;
t80 = t73 * t46;
t81 = t80 * n;
t82 = 0.3141592654e1 * t59;
t83 = t82 * t42;
t87 = xc * t11;
t88 = t87 * t62;
t91 = n * nx;
t92 = t55 * t61;
t96 = nx * t55;
t98 = t96 * t2 * t7;
t101 = xc * t59;
t102 = t101 * t62;
t108 = t1 * t1;
t109 = t108 * t7;
t111 = t59 * t35;
t112 = t111 * t15;
t115 = t35 * t20;
t123 = t1 * nx * t55;
t124 = t61 * t35;
t127 = t35 * t19;
t128 = t61 * t127;
t129 = t60 * t128;
t132 = t56 * t16;
t133 = t7 * t59;
t134 = t133 * t124;
t137 = 0.6e1 * t58 * t88 - 0.2e1 * t91 * t92 * t11 + 0.2e1 * t98 * t63 - 0.6e1 * t58 * t102 - 0.2e1 * t91 * t92 * t59 - 0.16e2 * t109 * xc * t112 - 0.2e1 * t91 * t6 * t115 * t59 + 0.12e2 * t40 * t83 + t123 * t41 * t124 - 0.2e1 * t58 * t129 + 0.4e1 * t132 * t134;
t139 = t56 * 0.3141592654e1;
t140 = t111 * t14;
t144 = t49 * t124;
t147 = t91 * t55;
t148 = t61 * ZA;
t154 = ZA * t115 * xc * ZB;
t157 = t7 * 0.3141592654e1;
t159 = t96 * t108 * t157;
t160 = t10 * xc;
t161 = t160 * t59;
t162 = t35 * t14;
t163 = t161 * t162;
t166 = t28 * t162;
t169 = t80 * t13;
t170 = t101 * t42;
t173 = t2 * t11;
t174 = t96 * t173;
t175 = t7 * t10;
t179 = t59 * t15;
t184 = t15 * t15;
t193 = t139 * t140 + 0.4e1 * t56 * n * t11 * t144 + 0.4e1 * t147 * t148 * ZB + 0.4e1 * t27 * t154 + 0.8e1 * t159 * t163 - 0.12e2 * t147 * t166 + 0.2e1 * t169 * t170 - 0.16e2 * t174 * t175 * t124 + 0.2e1 * t33 * t179 * t20 - 0.2e1 * t33 * t11 * t36 * t184 + 0.2e1 * t56 * t61 * 0.3141592654e1 * ZA * ZB;
t194 = t173 * 0.3141592654e1;
t195 = xc * t15;
t196 = t195 * t19;
t202 = t15 * t115;
t203 = t28 * t202;
t206 = t96 * t26;
t207 = t14 * t127;
t208 = t101 * t207;
t211 = t12 * t128;
t218 = t11 * t61;
t219 = t218 * t35;
t221 = t108 * ZA;
t223 = t7 * ZB;
t224 = t223 * t50;
t227 = ZA * xc;
t228 = ZB * t15;
t229 = t228 * t36;
t230 = t227 * t229;
t233 = t87 * t207;
t236 = t6 * t11;
t240 = -0.4e1 * t194 * t196 + 0.4e1 * t194 * t195 * t127 + 0.4e1 * t33 * t203 - 0.12e2 * t206 * t208 + 0.2e1 * t58 * t211 - 0.16e2 * t47 * t10 * t133 * t50 + t139 * t219 - 0.32e2 * t221 * t10 * t224 - 0.4e1 * t169 * t230 - 0.6e1 * t98 * t233 + 0.2e1 * t91 * t236 * t20;
t244 = t227 * t228 * t20;
t252 = t184 * t18;
t253 = t101 * t252;
t256 = t35 * t35;
t257 = t256 * t14;
t258 = t28 * t257;
t261 = t108 * t11;
t263 = t7 * t35;
t268 = ZB * t61 * t35;
t273 = t96 * t108 * t160;
t274 = t157 * ZB;
t276 = t274 * t148 * t35;
t279 = t101 * t21;
t282 = 0.3141592654e1 * xc;
t283 = t59 * t36;
t284 = t282 * t283;
t289 = 0.4e1 * t169 * t244 - 0.4e1 * t132 * t133 * t162 - 0.2e1 * t147 * t140 - 0.2e1 * t27 * t253 + 0.2e1 * t139 * t258 + 0.16e2 * t261 * t10 * t263 * t15 - 0.16e2 * t206 * t227 * t268 - 0.16e2 * t273 * t276 - 0.6e1 * t27 * t279 - 0.4e1 * t40 * t284 - 0.32e2 * t9 * t230;
t290 = t1 * t11;
t291 = t96 * t290;
t297 = t59 * t61;
t298 = t297 * t127;
t300 = ZB * t36;
t301 = t227 * t300;
t304 = t1 * t59;
t305 = t184 * t35;
t310 = t46 * ZB;
t311 = t184 * ZA;
t312 = t310 * t311;
t314 = t60 * t21;
t317 = t1 * ZA;
t318 = ZB * t35;
t321 = t1 * t256;
t324 = t96 * t261;
t325 = t10 * t157;
t326 = t325 * t124;
t329 = -0.4e1 * t291 * t282 * t128 + t123 * t82 * t62 - t139 * t298 + 0.12e2 * t27 * t301 + t304 * t305 - 0.2e1 * t58 * t12 * t66 - 0.2e1 * t312 + 0.8e1 * t9 * t314 + 0.2e1 * t317 * t318 + 0.2e1 * t321 * t28 - 0.8e1 * t324 * t326;
t331 = t28 * t124;
t334 = 0.3141592654e1 * t15;
t335 = t334 * t127;
t338 = t35 * ZA;
t341 = t46 * t256;
t344 = t46 * t11;
t346 = t46 * t59;
t348 = t297 * t35;
t351 = ZA * t10;
t352 = t351 * t300;
t355 = t1 * ZB;
t362 = 0.12e2 * t147 * t331 - 0.4e1 * t173 * t335 - 0.2e1 * t310 * t338 - 0.2e1 * t341 * t28 - t344 * t305 - t346 * t305 + 0.2e1 * t147 * t348 + 0.16e2 * t9 * t352 + 0.2e1 * t355 * t311 + t290 * t305 + 0.2e1 * t33 * t34 * t20;
t363 = t36 * t184;
t364 = t87 * t363;
t368 = t47 * t73 * t7;
t373 = t160 * t157;
t374 = t373 * t124;
t377 = t311 * t35;
t380 = t12 * t62;
t386 = ZB * t10 * ZA * t15 * t20;
t389 = t87 * t66;
t393 = t56 * t1 * t10;
t401 = 0.2e1 * t27 * t364 - 0.16e2 * t368 * t279 - t123 * t41 * t257 + 0.8e1 * t324 * t374 + 0.2e1 * t355 * t377 - 0.2e1 * t98 * t380 - 0.16e2 * t9 * t386 + 0.2e1 * t58 * t389 + 0.16e2 * t393 * t276 + t123 * t82 * t162 - 0.2e1 * t33 * t179 * t36;
t412 = t11 * t14 * t127;
t416 = t11 * t19;
t417 = t416 * t61;
t421 = t96 * t2 * ZA;
t426 = t56 * n * ZA;
t427 = t318 * t14;
t428 = t49 * t427;
t431 = t82 * t29;
t434 = t87 * t21;
t442 = 0.2e1 * t33 * t11 * t184 * t18 + 0.4e1 * t81 * t284 - t139 * t412 + 0.2e1 * t147 * t219 - 0.2e1 * t147 * t417 + 0.32e2 * t421 * t175 * t268 + 0.8e1 * t426 * t428 + 0.4e1 * t81 * t431 - 0.2e1 * t169 * t434 - 0.2e1 * t98 * t129 - 0.32e2 * t47 * t28 * t51;
t443 = t184 * t20;
t447 = t61 * 0.3141592654e1;
t448 = t447 * t11;
t450 = t49 * t268;
t453 = t60 * t42;
t456 = t41 * t202;
t463 = t101 * t443;
t469 = t41 * xc * t20;
t474 = -0.8e1 * t27 * t87 * t443 - t56 * t448 - 0.8e1 * t426 * t450 + 0.8e1 * t368 * t453 + 0.4e1 * t40 * t456 + 0.4e1 * t40 * t431 - 0.4e1 * t81 * t456 - 0.4e1 * t27 * t463 + 0.6e1 * t139 * t331 + 0.2e1 * t40 * t469 - 0.16e2 * t9 * t434;
t482 = t108 * t10;
t492 = n * t46;
t493 = t492 * t11;
t495 = t282 * t19 * t184;
t498 = t56 * t290;
t499 = t325 * t162;
t502 = t416 * t14;
t504 = t60 * t207;
t507 = -t123 * t82 * t257 - 0.4e1 * t169 * t301 + t123 * t41 * t162 + 0.16e2 * t482 * t7 * t112 - 0.12e2 * t206 * t102 - t123 * t82 * t66 - 0.4e1 * t147 * t258 - 0.4e1 * t493 * t495 - 0.8e1 * t498 * t499 + t139 * t502 - 0.2e1 * t98 * t504;
t508 = t101 * t162;
t512 = t41 * t115 * xc;
t515 = t87 * t42;
t520 = ZB * t184;
t522 = t227 * t520 * t18;
t525 = t492 * t59;
t528 = t6 * t59;
t532 = t520 * t20;
t533 = t351 * t532;
t539 = t447 * t59;
t544 = 0.8e1 * t206 * t508 - 0.2e1 * t40 * t512 - 0.16e2 * t368 * t515 + 0.12e2 * t206 * t88 + 0.4e1 * t27 * t522 + 0.4e1 * t525 * t495 - 0.4e1 * t91 * t528 * t36 - 0.16e2 * t368 * t533 - 0.16e2 * t206 * t227 * t427 - t56 * t539 - 0.2e1 * t132 * t133 * t66;
t551 = t87 * t162;
t554 = t351 * t229;
t560 = t59 * t19;
t561 = t560 * t14;
t564 = t101 * t202;
t567 = t87 * t252;
t573 = t227 * t228 * t115;
t578 = 0.4e1 * t33 * t70 + 0.4e1 * t493 * t335 - 0.4e1 * t58 * t551 + 0.16e2 * t9 * t554 - 0.4e1 * t33 * t28 * t252 + 0.2e1 * t147 * t561 + 0.2e1 * t169 * t564 - 0.2e1 * t27 * t567 - 0.8e1 * t324 * t499 - 0.4e1 * t169 * t573 + 0.12e2 * t27 * t244;
t579 = t82 * t202;
t591 = t282 * t115 * t59;
t598 = t101 * t66;
t606 = -0.4e1 * t81 * t579 - 0.2e1 * t169 * t567 - 0.6e1 * t27 * t170 + 0.8e1 * t169 * t203 + 0.2e1 * t98 * t67 + 0.2e1 * t81 * t591 + 0.32e2 * t368 * t244 - 0.2e1 * t27 * t564 + 0.4e1 * t206 * t598 + 0.16e2 * t9 * t170 + 0.2e1 * t33 * t283 * t184;
t608 = t373 * t162;
t611 = t59 * t184;
t617 = t101 * t29;
t624 = t227 * ZB * t18 * t15;
t629 = t157 * t59;
t630 = t629 * t124;
t633 = t3 * t6;
t634 = t175 * t283;
t644 = 0.8e1 * t498 * t608 + 0.2e1 * t33 * t611 * t18 - 0.4e1 * t206 * t389 - 0.2e1 * t27 * t617 - 0.4e1 * t169 * t154 + 0.4e1 * t27 * t624 + 0.12e2 * t27 * t230 - 0.8e1 * t393 * t630 - 0.8e1 * t633 * t634 + 0.16e2 * t47 * t7 * t101 * t50 + 0.2e1 * t123 * t447 * t28;
t645 = t41 * t29;
t648 = t2 * 0.3141592654e1;
t649 = t648 * xc;
t650 = t560 * t184;
t656 = t56 * t1 * t157;
t659 = t87 * t128;
t662 = t96 * t482;
t663 = t629 * t162;
t671 = t161 * t124;
t674 = t218 * t127;
t679 = 0.4e1 * t81 * t645 - 0.4e1 * t649 * t650 - 0.8e1 * t169 * t70 + 0.8e1 * t656 * t163 - 0.2e1 * t98 * t659 - 0.8e1 * t662 * t663 - 0.32e2 * t421 * t175 * t427 - 0.2e1 * t147 * t502 + 0.8e1 * t656 * t671 + 0.2e1 * t147 * t674 - 0.16e2 * t368 * t386;
t714 = t334 * t19;
t719 = t12 * t42;
t722 = t304 * t35 - t346 * t35 + t341 * t59 - t344 * t35 + t344 * t256 + t346 * t184 - 0.16e2 * t368 * t554 - 0.16e2 * t48 * t175 * t50 + 0.4e1 * t525 * t714 - 0.2e1 * t58 * t659 + 0.8e1 * t368 * t719;
t730 = xc * t19;
t735 = t59 * t256 * t14;
t752 = 0.4e1 * t173 * t714 - 0.6e1 * t27 * t515 - 0.16e2 * t9 * t279 + 0.4e1 * t194 * t730 * t184 - t139 * t735 - 0.4e1 * t492 * t127 * t82 * xc - 0.4e1 * t98 * t508 - t123 * t41 * t207 - 0.2e1 * t147 * t298 + 0.8e1 * t368 * t314 + 0.6e1 * t132 * t133 * t207;
t755 = t28 * t21;
t759 = t274 * t338 * t14;
t767 = t11 * t35;
t768 = t767 * t14;
t778 = t560 * t61;
t781 = -0.2e1 * t58 * t504 - 0.8e1 * t27 * t755 + 0.16e2 * t662 * t759 + 0.12e2 * t291 * t282 * t207 - 0.6e1 * t27 * t434 + t139 * t768 - 0.8e1 * t498 * t326 + 0.4e1 * t33 * t611 * t20 + 0.2e1 * t81 * t512 - t139 * t561 + 0.2e1 * t147 * t778;
t786 = t12 * t443;
t790 = t282 * t59 * t20;
t796 = t59 * t14 * t127;
t806 = t41 * t21;
t811 = -0.8e1 * t393 * t663 + 0.8e1 * t368 * t786 + 0.2e1 * t81 * t790 + 0.4e1 * t169 * t624 + t139 * t796 + 0.2e1 * t206 * t258 - 0.2e1 * t40 * t591 - 0.8e1 * t662 * t630 - 0.4e1 * t33 * t30 - 0.4e1 * t40 * t806 + 0.8e1 * t9 * t786;
t819 = t282 * t15 * t127;
t822 = t101 * t363;
t830 = t11 * t256 * t14;
t835 = t227 * t532;
t842 = 0.2e1 * t33 * t11 * t18 * t15 + t123 * t41 * t66 - 0.4e1 * t493 * t819 - 0.2e1 * t27 * t822 - 0.16e2 * t368 * t170 - 0.4e1 * t169 * t463 - t139 * t830 - 0.4e1 * t649 * t179 * t127 + 0.12e2 * t27 * t835 - 0.16e2 * t368 * t434 - 0.2e1 * t40 * t790;
t845 = t87 * t202;
t854 = t338 * t15;
t859 = t12 * t207;
t868 = t139 * t348 - 0.2e1 * t27 * t845 + 0.8e1 * t169 * t755 - 0.2e1 * t58 * t380 + 0.6e1 * t206 * t331 + 0.8e1 * t310 * t854 - 0.2e1 * t169 * t822 + 0.2e1 * t98 * t859 + 0.8e1 * t159 * t671 + 0.8e1 * t74 * t634 - 0.2e1 * t169 * t253;
t880 = t60 * t443;
t891 = t101 * t128;
t894 = -t123 * t539 - 0.2e1 * t147 * t796 + 0.32e2 * t368 * t230 + t139 * t674 - 0.16e2 * t98 * t60 * t124 + 0.32e2 * t9 * t244 + 0.8e1 * t368 * t880 - 0.8e1 * t40 * t41 * xc * t36 - t123 * t82 * t128 - 0.6e1 * t58 * t233 + 0.2e1 * t58 * t891;
t903 = t179 * t19;
t920 = t56 * t1 * t160;
t925 = -0.2e1 * t174 * t175 * t66 - 0.4e1 * t493 * t714 + 0.4e1 * t649 * t903 - 0.4e1 * t81 * t43 + t123 * t82 * t207 + 0.4e1 * t206 * t891 - 0.16e2 * t273 * t759 - 0.8e1 * t27 * t203 + 0.32e2 * t221 * ZB * t51 - 0.16e2 * t920 * t759 - 0.8e1 * t9 * t453;
t932 = t87 * t29;
t945 = t82 * t21;
t953 = -0.16e2 * t920 * t276 - 0.8e1 * t169 * t30 - 0.8e1 * t633 * t77 - 0.2e1 * t27 * t932 - 0.4e1 * t174 * t49 * t162 + 0.8e1 * t206 * t87 * t124 - 0.2e1 * t147 * t768 + 0.4e1 * t169 * t522 - 0.12e2 * t81 * t945 + 0.4e1 * t33 * t28 * t115 + 0.4e1 * t525 * t819;
t971 = t282 * t127;
t978 = -0.6e1 * t98 * t102 + 0.2e1 * t169 * t515 - 0.2e1 * t310 * t377 + 0.2e1 * t147 * t830 + 0.8e1 * t368 * t22 - 0.2e1 * t169 * t617 + 0.16e2 * t662 * t276 - 0.8e1 * t355 * t854 + 0.4e1 * t493 * t971 - 0.16e2 * t9 * t533 - 0.2e1 * t169 * t279;
t997 = xc * t127;
t998 = t997 * t59;
t1003 = 0.4e1 * t40 * t579 + 0.2e1 * t169 * t845 + 0.16e2 * t9 * t515 + 0.8e1 * t206 * t551 + t123 * t41 * t128 + 0.16e2 * t98 * t60 * t162 + 0.2e1 * t169 * t364 - 0.2e1 * t169 * t932 + t139 * t778 + 0.4e1 * t648 * t998 + 0.2e1 * t147 * t412;
t1006 = t2 * t59;
t1017 = xc * t35;
t1033 = 0.4e1 * t1006 * t335 + 0.4e1 * t81 * t806 - 0.2e1 * t33 * t34 * t115 + 0.8e1 * t498 * t374 - 0.16e2 * t261 * t7 * t1017 * t15 + 0.8e1 * t206 * t101 * t124 - t123 * t448 + 0.2e1 * t147 * t735 + 0.6e1 * t98 * t208 + 0.6e1 * t98 * t88 - 0.4e1 * t33 * t755;
t1055 = -0.4e1 * t173 * t971 + 0.2e1 * t98 * t891 + 0.8e1 * t9 * t880 + 0.4e1 * t169 * t835 - t304 * t184 + t344 * t184 - t123 * t41 * t62 - 0.2e1 * t98 * t598 + 0.2e1 * t58 * t859 + 0.32e2 * t47 * t351 * t224 + 0.2e1 * t98 * t389;
t1070 = t15 * t19;
t1089 = -0.16e2 * t368 * t352 - 0.8e1 * t9 * t719 + 0.4e1 * t96 * t2 * xc * t134 - 0.2e1 * t91 * t236 * t115 + 0.4e1 * t27 * t573 + 0.4e1 * t493 * t282 * t1070 + 0.2e1 * t33 * t59 * t18 * t15 + 0.12e2 * t40 * t945 - 0.4e1 * t492 * xc * t82 * t1070 - 0.2e1 * t91 * t528 * t20 + 0.8e1 * t324 * t608;
t1113 = t123 * t82 * t124 + 0.8e1 * t421 * t428 - t139 * t417 + 0.4e1 * t40 * t645 + 0.16e2 * t393 * t759 - 0.2e1 * t33 * t179 * t115 - 0.4e1 * t525 * t335 + 0.4e1 * t33 * t28 * t36 - 0.4e1 * t1006 * t714 + 0.6e1 * t206 * t166 - 0.8e1 * t421 * t450;
t1119 = t321 * t46;
t1122 = t157 * t11;
t1123 = t1122 * t2;
t1124 = t184 * t46;
t1128 = t108 * n;
t1132 = t7 * t7;
t1133 = t1132 * t11;
t1134 = t1133 * t108;
t1135 = t15 * t46;
t1139 = t7 * ZA;
t1140 = t1139 * ZB;
t1141 = t1 * t35;
t1145 = t629 * t2;
t1146 = t1135 * t730;
t1149 = t157 * t1128;
t1150 = t1149 * xc;
t1153 = t46 * xc;
t1154 = t1153 * t127;
t1158 = t184 * t1 * t46;
t1161 = t46 * t46;
t1162 = t35 * t1161;
t1166 = t7 * t1;
t1170 = -0.4e1 * t133 * t1119 + 0.16e2 * t1123 * t1124 * t730 - 0.8e1 * t1122 * t1128 * t196 - 0.64e2 * t1134 * t1135 * t1017 - 0.32e2 * t1140 * t1141 * t1135 + 0.16e2 * t1145 * t1146 - 0.8e1 * t1150 * t650 - 0.16e2 * t1123 * t1154 - 0.4e1 * t133 * t1158 - 0.16e2 * t1140 * t1162 * t15 + 0.8e1 * t1166 * t35 * t312;
t1171 = t1161 * t184;
t1175 = t1122 * n;
t1176 = t15 * t1161;
t1180 = t1132 * ZA;
t1181 = t1180 * t355;
t1182 = t1176 * t1017;
t1185 = t1161 * xc;
t1189 = t1133 * t1;
t1192 = t108 * t1;
t1193 = t1132 * t1192;
t1195 = t10 * t35;
t1199 = t157 * t15;
t1203 = t1141 * t46;
t1211 = t184 * t108;
t1218 = 0.2e1 * t133 * t1171 * t35 + 0.8e1 * t1175 * t1176 * t997 + 0.64e2 * t1181 * t1182 - 0.8e1 * t1175 * t1185 * t127 - 0.32e2 * t1189 * t1182 - 0.64e2 * t1193 * ZA * t1195 * t228 + 0.8e1 * t1199 * t416 * t1128 + 0.8e1 * t1140 * t1203 - 0.4e1 * t75 * t1158 - 0.8e1 * t1199 * t560 * t1128 - 0.2e1 * t133 * t1211 - 0.8e1 * t1199 * t127 * t11 * t1128;
t1221 = t256 * t1161;
t1224 = t35 * t108;
t1233 = t7 * t256;
t1236 = -t75 * t1211 - t75 * t1221 - t133 * t1221 + t75 * t1224 - t75 * t1171 - t133 * t1171 + t133 * t1224 + t75 * t1162 - t75 * t108 * t256 + t133 * t1162 - t1233 * t59 * t108;
t1240 = t1135 * t1195;
t1252 = t629 * t127;
t1263 = t1171 * ZA;
t1280 = -0.128e3 * t1180 * ZB * t108 * t1240 + 0.32e2 * t1193 * t10 * t112 + 0.4e1 * t133 * t1203 + 0.4e1 * t109 * t256 * ZA * ZB - 0.8e1 * t1252 * n * t15 * t1185 + 0.8e1 * t1175 * t1171 * t730 - 0.8e1 * t1175 * t1176 * t127 + 0.4e1 * t223 * t1263 - 0.8e1 * t1175 * t1176 * t730 + 0.8e1 * t1166 * ZA * t341 * ZB + 0.64e2 * t1134 * t1240 + 0.8e1 * t1122 * xc * t1128 * t127 * t15;
t1283 = t1199 * t19;
t1287 = t1199 * t127;
t1289 = t59 * n * t1161;
t1293 = t157 * n * xc;
t1304 = t1132 * t108;
t1310 = t263 * ZB;
t1316 = t2 * t15;
t1323 = -0.16e2 * t1283 * t1006 * t46 + 0.8e1 * t1287 * t1289 + 0.8e1 * t1293 * t127 * t1161 * t59 + 0.16e2 * t1123 * t1135 * t19 + 0.8e1 * t1293 * t560 * t1176 + 0.64e2 * t1304 * t59 * t1240 + 0.4e1 * t75 * t1203 + 0.4e1 * t1310 * t1263 + 0.4e1 * t223 * t338 * t108 - 0.16e2 * t1252 * t1316 * t1153 - 0.16e2 * t1310 * t221 * t15;
t1330 = t1132 * t15;
t1336 = t1132 * t1;
t1338 = t1162 * t179;
t1370 = 0.8e1 * t1175 * t1176 * t19 + 0.4e1 * t1139 * t318 * t1161 + 0.128e3 * t1330 * t318 * t108 * t46 * t227 - 0.32e2 * t1336 * xc * t1338 + 0.4e1 * t1233 * ZA * t1161 * ZB - 0.8e1 * t1287 * t59 * t1128 * xc + 0.2e1 * t75 * t305 * t108 + 0.8e1 * t1199 * t127 * t59 * t1128 - 0.8e1 * t1283 * t1289 - 0.8e1 * t1293 * t560 * t1171 + 0.4e1 * t133 * t35 * t1158 + 0.8e1 * t157 * t184 * t19 * t11 * t1128 * xc;
t1376 = t7 * t184;
t1380 = t1176 * t1195;
t1393 = t1330 * t35;
t1411 = 0.16e2 * t1145 * t1154 + 0.8e1 * t1149 * t998 + 0.4e1 * t1376 * t35 * t48 + 0.32e2 * t1189 * t1380 + 0.32e2 * t1193 * t11 * t1195 * t15 - 0.64e2 * t1304 * xc * t111 * t1135 - 0.16e2 * t1123 * t1146 + 0.64e2 * t1393 * t28 * t1192 * xc - 0.16e2 * t1123 * t1135 * t127 - 0.8e1 * t1122 * xc * t1128 * t127 - 0.32e2 * t1193 * xc * t112 + 0.16e2 * t1252 * t1316 * t46;
t1450 = 0.2e1 * t1376 * t767 * t1161 + 0.2e1 * t1376 * t111 * t108 + 0.4e1 * t223 * t311 * t108 + 0.4e1 * t109 * t35 * t520 * ZA + 0.16e2 * t1123 * t1135 * t997 - 0.64e2 * t1181 * t1380 + 0.8e1 * t1150 * t903 - 0.32e2 * t1393 * t11 * t1192 * xc - 0.16e2 * t157 * t2 * xc * t560 * t1124 + 0.8e1 * t223 * t184 * t317 * t46 + 0.32e2 * t1336 * t10 * t1338 - 0.4e1 * t75 * t1119;
C3B = (t606 + t722 + t1089 + t781 + 0.16e2 * t48 * t51 + t978 + t868 + t507 - t304 * t256 + 0.8e1 * t9 * t22 + t752 + 0.4e1 * t174 * t144 - 0.2e1 * t81 * t469 + 0.6e1 * t139 * t166 + t362 + 0.2e1 * t98 * t211 + t925 + t137 - t290 * t184 + 0.12e2 * t81 * t83 + t842 + 0.8e1 * t74 * t77 + 0.16e2 * t98 * t12 * t162 - 0.4e1 * t33 * t28 * t443 - 0.8e1 * t27 * t70 - 0.2e1 * t33 * t34 * t36 - 0.8e1 * t27 * t30 + 0.2e1 * t58 * t67 - 0.4e1 * t40 * t43 + 0.2e1 * t58 * t63 + t1033 - t290 * t256 + t290 * t35 + t193 + t1113 + t578 + t442 + t474 + t544 + t329 + t679 + t401 + t953 + t811 + t644 + t894 + t289 + t240 + t1055 + t1003) / (t1170 + t1218 + 0.2e1 * t1236 + t1280 + t1323 + t1370 + t1411 + t1450);
%**************************************************************************************%
t1 = n * n;
t2 = t1 * xc;
t3 = ZB * ZB;
t5 = t2 * 0.3141592654e1 * t3;
t6 = nx * 0.3141592654e1;
t7 = t6 * xc;
t8 = cos(t7);
t9 = nx * nx;
t10 = t8 * t9;
t11 = n * 0.3141592654e1;
t12 = exp(t11);
t13 = t12 * t12;
t16 = exp(xc * n * 0.3141592654e1);
t17 = t16 * t16;
t18 = t17 * t16;
t19 = t17 * t17;
t20 = t19 * t18;
t21 = t13 * t20;
t22 = t10 * t21;
t25 = ZA * ZA;
t26 = t1 * t25;
t27 = xc * 0.3141592654e1;
t28 = t26 * t27;
t29 = t19 * t16;
t30 = t13 * t13;
t31 = t29 * t30;
t35 = t9 * nx;
t36 = t3 * t35;
t37 = sin(t6);
t38 = t13 * t12;
t39 = t37 * t38;
t40 = t39 * t19;
t42 = t1 * t1;
t43 = nx * t42;
t44 = xc * xc;
t45 = t25 * t44;
t46 = t43 * t45;
t47 = 0.3141592654e1 * 0.3141592654e1;
t48 = t47 * t37;
t49 = t17 * t38;
t54 = 0.3141592654e1 * t35;
t55 = ZA * n * t54;
t56 = t37 * ZB;
t57 = t19 * t12;
t61 = t25 * t8;
t62 = t61 * t9;
t63 = n * t30;
t64 = t63 * t16;
t67 = t1 * n;
t69 = t47 * ZB;
t70 = t67 * t44 * t69;
t75 = nx * t3;
t76 = t75 * t37;
t77 = t67 * 0.3141592654e1;
t78 = t19 * t19;
t79 = t78 * t12;
t80 = t77 * t79;
t82 = t3 * t38;
t84 = t54 * t37;
t87 = sin(t7);
t88 = t29 * t87;
t89 = t47 * t44;
t93 = nx * t25;
t94 = t87 * t42;
t95 = t93 * t94;
t96 = t47 * xc;
t97 = t13 * t29;
t98 = t96 * t97;
t101 = t87 * t67;
t102 = t93 * t101;
t103 = t13 * t18;
t107 = t47 * t35;
t108 = t26 * t107;
t109 = t37 * t44;
t110 = t19 * t17;
t111 = t12 * t110;
t116 = t37 * t19 * t12;
t118 = t37 * xc;
t119 = ZB * t19;
t120 = t119 * t12;
t121 = t118 * t120;
t125 = xc * t3;
t126 = t1 * t47 * t125;
t127 = t35 * t37;
t128 = t38 * t19;
t129 = t127 * t128;
t132 = t26 * 0.3141592654e1;
t133 = t16 * t13;
t134 = t10 * t133;
t137 = 0.3141592654e1 * ZB;
t138 = t2 * t137;
t139 = ZA * t8;
t140 = t9 * t13;
t145 = t30 * t18;
t146 = t10 * t145;
t149 = t3 * t8;
t150 = t149 * t9;
t153 = 0.2e1 * t5 * t22 + 0.2e1 * t28 * t10 * t31 + t36 * t40 - 0.2e1 * t46 * t48 * t49 - 0.2e1 * t55 * t56 * t57 - 0.2e1 * t62 * t64 + 0.16e2 * t70 * t29 * ZA * t10 - t76 * t80 + t82 * n * t84 + 0.8e1 * t43 * t3 * t88 * t89 + 0.16e2 * t95 * t98 + 0.2e1 * t102 * t27 * t103 - 0.2e1 * t108 * t109 * t111 + t36 * t116 + 0.8e1 * t55 * t121 - 0.4e1 * t126 * t129 - 0.4e1 * t132 * t134 - 0.4e1 * t138 * t139 * t140 * t20 + 0.8e1 * t28 * t146 - 0.2e1 * t150 * t64;
t154 = t42 * n;
t155 = nx * t154;
t156 = t44 * xc;
t157 = t47 * 0.3141592654e1;
t158 = t156 * t157;
t159 = t155 * t158;
t162 = t56 * ZA * t19 * t12;
t165 = t77 * t49;
t167 = t1 * t3;
t168 = t167 * t89;
t169 = t127 * t49;
t172 = t37 * t67;
t173 = t75 * t172;
t174 = t38 * t110;
t175 = t27 * t174;
t179 = t47 * t25;
t181 = t10 * t97;
t184 = t27 * t31;
t187 = t67 * t47;
t188 = t44 * t3;
t189 = t187 * t188;
t192 = t25 * t35;
t193 = t37 * t17;
t194 = t193 * t12;
t196 = nx * ZA;
t197 = t196 * t172;
t198 = ZB * t38;
t199 = t198 * t19;
t204 = t1 * t12 * t110;
t207 = nx * ZB;
t209 = t1 * ZA;
t215 = t67 * t3;
t216 = t47 * t8;
t217 = t215 * t216;
t218 = t9 * xc;
t222 = nx * t67;
t223 = t222 * t27;
t224 = t3 * t87;
t228 = t167 * t107;
t232 = t26 * t96;
t235 = t207 * t94;
t236 = t47 * ZA;
t243 = xc * t13;
t244 = t243 * t29;
t248 = t25 * n;
t249 = t248 * 0.3141592654e1;
t253 = ZB * ZA;
t254 = t253 * t8;
t255 = t9 * n;
t256 = t30 * t16;
t260 = 0.2e1 * t207 * t37 * t209 * t128 + 0.2e1 * t5 * t134 - 0.16e2 * t217 * t218 * t97 - 0.2e1 * t223 * t224 * t31 - 0.2e1 * t228 * t109 * t174 - 0.2e1 * t232 * t169 - 0.16e2 * t235 * t236 * t44 * t30 * t18 - 0.4e1 * t196 * t101 * t137 * t244 + t249 * t169 + 0.8e1 * t168 * t129 + 0.4e1 * t254 * t255 * t256;
t263 = t43 * t179;
t267 = t3 * n;
t268 = t267 * t54;
t269 = t118 * t57;
t272 = t39 * t1;
t274 = t67 * t25;
t275 = t274 * t158;
t278 = t75 * t87;
t279 = t77 * t103;
t282 = t25 * t38;
t285 = ZA * t38;
t290 = t267 * 0.3141592654e1;
t296 = t77 * t111;
t298 = t196 * t37;
t299 = t1 * ZB;
t303 = t37 * t42;
t304 = t196 * t303;
t308 = t77 * t57;
t310 = t26 * t89;
t313 = t77 * t128;
t316 = t101 * t27;
t319 = t93 * t87;
t320 = t77 * t97;
t323 = t127 * t57;
t326 = t10 * n;
t329 = t118 * t174;
t332 = -0.8e1 * t263 * t109 * t57 - 0.4e1 * t268 * t269 + t93 * t272 + 0.8e1 * t275 * t129 - 0.4e1 * t278 * t279 + t282 * n * t84 - 0.2e1 * t285 * n * t54 * t56 - t290 * t169 - 0.2e1 * t196 * t38 * t172 * t137 + t76 * t296 - 0.2e1 * t298 * t299 * t79 + 0.8e1 * t304 * t96 * t120 + t76 * t308 - 0.2e1 * t310 * t169 - t76 * t313 + 0.2e1 * t75 * t18 * t316 + 0.4e1 * t319 * t320 + t249 * t323 - 0.2e1 * t25 * t18 * t326 + 0.2e1 * t228 * t329;
t335 = t75 * t101;
t336 = t27 * t21;
t342 = t77 * t133;
t347 = t209 * t137;
t350 = t9 * t1;
t351 = t149 * t350;
t355 = t37 * t78 * t12;
t359 = t93 * t303;
t367 = t172 * 0.3141592654e1;
t369 = t96 * t103;
t376 = t209 * t107;
t379 = t10 * t103;
t383 = t207 * t101;
t389 = 0.3141592654e1 * ZA;
t390 = t222 * t389;
t391 = t87 * ZB;
t398 = -0.2e1 * t102 * t336 + t93 * t38 * t367 + 0.16e2 * t95 * t369 - t82 * t127 - 0.8e1 * t197 * t27 * t120 + 0.8e1 * t376 * t121 - 0.8e1 * t189 * t379 - t249 * t129 - 0.4e1 * t383 * t27 * ZA * t16 * t13 - 0.8e1 * t390 * t391 * t21 - 0.2e1 * t197 * t137 * t57;
t402 = t39 * t110;
t404 = t193 * t38;
t406 = t127 * t174;
t408 = t167 * 0.3141592654e1;
t411 = t44 * t157;
t412 = t155 * t411;
t413 = t285 * t19;
t414 = t56 * t413;
t417 = ZA * t30;
t424 = t93 * t37;
t426 = t248 * t54;
t427 = t17 * t12;
t428 = t118 * t427;
t431 = t77 * t21;
t438 = ZA * t13;
t443 = t93 * t172;
t444 = t27 * t427;
t448 = t1 * t78 * t12;
t455 = t274 * t89;
t461 = t118 * t111;
t464 = -t36 * t402 + t36 * t404 - t249 * t406 - 0.4e1 * t408 * t134 + 0.16e2 * t412 * t414 - 0.4e1 * t383 * t27 * t417 * t18 + 0.2e1 * t28 * t22 - t424 * t80 - 0.2e1 * t426 * t428 + 0.4e1 * t278 * t431 + 0.4e1 * t254 * t255 * t103 + t290 * t323 + 0.4e1 * t383 * t27 * t438 * t20 + 0.2e1 * t443 * t444 + t424 * t448 - t36 * t194 - 0.32e2 * t235 * t236 * t243 * t18 + 0.8e1 * t455 * t181 - 0.4e1 * t359 * t96 * t128 - 0.2e1 * t426 * t461;
t469 = n * t16 * t13;
t474 = t1 * t38;
t475 = t474 * t19;
t480 = t89 * t103;
t483 = t67 * ZA;
t484 = t483 * t411;
t485 = t127 * t120;
t488 = t127 * t111;
t497 = t77 * t427;
t502 = t27 * t97;
t508 = t1 * t19 * t12;
t511 = t155 * t25 * t156;
t512 = t157 * t37;
t513 = t512 * t128;
t527 = t1 * t17;
t528 = t527 * t38;
t530 = -t76 * t497 - 0.4e1 * t254 * t255 * t97 - 0.2e1 * t102 * t502 - 0.4e1 * t108 * t269 - t76 * t508 + 0.8e1 * t511 * t513 + 0.4e1 * t150 * t63 * t18 + 0.4e1 * t383 * t27 * t438 * t18 + 0.4e1 * t132 * t379 + 0.2e1 * t168 * t488 - t76 * t528;
t535 = t44 * t13;
t542 = t527 * t12;
t544 = n * t13;
t545 = t544 * t20;
t548 = t75 * t303;
t549 = t96 * t111;
t552 = ZA * t35;
t553 = t552 * t37;
t562 = t43 * t96;
t563 = t3 * t37;
t564 = t563 * t128;
t579 = t474 * t110;
t590 = t9 * t30;
t591 = t590 * t18;
t595 = t127 * t427;
t598 = t77 * t174;
t600 = 0.4e1 * t5 * t146 + 0.16e2 * t235 * t236 * t535 * t18 + 0.8e1 * t455 * t146 + t76 * t542 - 0.2e1 * t150 * t545 + 0.2e1 * t548 * t549 - 0.2e1 * t553 * t120 + t290 * t488 - 0.8e1 * t274 * t47 * t44 * t29 * t10 - 0.4e1 * t562 * t564 - 0.2e1 * t132 * xc * t20 * t10 - 0.32e2 * t562 * ZA * t87 * ZB * t13 * t29 - 0.8e1 * t347 * t379 + t76 * t579 - 0.4e1 * t359 * t96 * t57 + 0.4e1 * t408 * t181 - 0.4e1 * t223 * t564 - 0.12e2 * t209 * t27 * ZB * t8 * t591 + 0.2e1 * t310 * t595 + t76 * t598;
t601 = t27 * t49;
t604 = t127 * t79;
t606 = ZB * t29;
t616 = t139 * t140 * t18;
t638 = t10 * t256;
t643 = t118 * t199;
t653 = t544 * t29;
t658 = t3 * t29;
t660 = t350 * t27;
t663 = -0.4e1 * t254 * t255 * t145 + 0.2e1 * t267 * t20 * t8 * t9 - 0.4e1 * t138 * t139 * t9 * t16 * t13 - 0.2e1 * t5 * t638 + 0.2e1 * t126 * t169 + 0.8e1 * t376 * t643 + 0.4e1 * t335 * t27 * t145 + 0.16e2 * t235 * t236 * t535 * t29 + 0.6e1 * t150 * t653 - 0.4e1 * t426 * t269 + 0.4e1 * t658 * t8 * t660;
t670 = t274 * t411;
t673 = t118 * t49;
t694 = t155 * t45;
t713 = n * t29 * t30;
t717 = t20 * t87;
t723 = t512 * t57;
t728 = -0.2e1 * t443 * t175 - 0.8e1 * t670 * t129 + 0.2e1 * t426 * t673 - 0.16e2 * t207 * t88 * t42 * t47 * ZA * t44 + 0.4e1 * t254 * t255 * t21 + t249 * t595 + 0.8e1 * t25 * t29 * t8 * t660 + 0.2e1 * t268 * t461 + 0.8e1 * t189 * t181 - 0.8e1 * t694 * t513 + 0.2e1 * t198 * t553 - 0.12e2 * t606 * t139 * t660 - 0.2e1 * t359 * t549 + 0.4e1 * t138 * t139 * t590 * t16 + 0.8e1 * t93 * t29 * t94 * t89 - 0.2e1 * t150 * t713 + 0.2e1 * t222 * t3 * t717 * t27 + 0.8e1 * t670 * t323 + 0.8e1 * t694 * t723 - 0.2e1 * t62 * t653;
t734 = t43 * t89;
t735 = t563 * t427;
t740 = t75 * t94;
t744 = ZB * xc;
t750 = t563 * t57;
t754 = t218 * t103;
t771 = t127 * t199;
t776 = t89 * t174;
t791 = -0.4e1 * t207 * t717 * t77 * xc * ZA + 0.4e1 * t443 * t27 * t57 + t192 * t40 - 0.8e1 * t55 * t643 - 0.16e2 * t209 * t89 * t771 - 0.8e1 * t275 * t323 + 0.2e1 * t359 * t776 + 0.16e2 * t304 * t89 * t199 + 0.4e1 * t278 * t320 + 0.2e1 * t207 * t172 * t389 * t79 - 0.8e1 * t390 * t391 * t97;
t794 = t483 * t158;
t801 = t2 * 0.3141592654e1;
t818 = t215 * t411;
t827 = t96 * t174;
t837 = t37 * t12 * t110;
t845 = 0.16e2 * t794 * t485 + 0.8e1 * t159 * t564 - 0.8e1 * t455 * t379 - 0.2e1 * t801 * t3 * t20 * t10 - 0.4e1 * t132 * t22 - 0.8e1 * t734 * t564 - 0.8e1 * t187 * t44 * t658 * t10 - 0.8e1 * t412 * t564 + 0.4e1 * t132 * t181 - 0.8e1 * t818 * t129 + 0.2e1 * t46 * t48 * t427 - 0.4e1 * t75 * t29 * t316 - 0.2e1 * t359 * t827 - t290 * t595 + 0.16e2 * t217 * t754 - t424 * t542 - 0.8e1 * t734 * t750 - t192 * t837 - 0.4e1 * t254 * t255 * t133 + 0.8e1 * t304 * t96 * t199;
t864 = t544 * t18;
t867 = t3 * t18;
t884 = t27 * t256;
t891 = t187 * t744;
t894 = t563 * t49;
t900 = -0.2e1 * t263 * t428 + 0.2e1 * t228 * t428 - 0.6e1 * t223 * t224 * t103 - t192 * t404 + 0.2e1 * t268 * t428 - 0.2e1 * t335 * t884 - t424 * t296 + 0.2e1 * t93 * t20 * t316 - 0.32e2 * t891 * t616 + 0.2e1 * t562 * t894 - 0.2e1 * t801 * t867 * t10;
t904 = t27 * t111;
t907 = t118 * t128;
t915 = t89 * t145;
t947 = t139 * t140 * t29;
t952 = -0.2e1 * t173 * t904 + 0.4e1 * t426 * t907 + 0.12e2 * t253 * t10 * t1 * 0.3141592654e1 * t244 + 0.8e1 * t95 * t915 - t36 * t355 - 0.16e2 * t794 * t771 - 0.8e1 * t511 * t723 + 0.16e2 * t734 * t162 + t36 * t837 + 0.2e1 * t298 * t299 * t57 - 0.2e1 * t28 * t638 - 0.2e1 * t62 * t545 + 0.2e1 * t310 * t406 + 0.12e2 * t138 * t616 + 0.4e1 * t223 * t750 + t424 * t497 + 0.2e1 * t734 * t894 + 0.2e1 * t132 * xc * t18 * t10 - 0.16e2 * t70 * t947 + 0.32e2 * t891 * t947;
t969 = t67 * t157 * t156 * t3;
t974 = t27 * t133;
t1001 = -0.8e1 * t159 * t750 - 0.16e2 * t412 * t162 - t290 * t129 + 0.8e1 * t310 * t323 - 0.4e1 * t319 * t342 + t75 * t272 + t192 * t402 - 0.8e1 * t359 * t89 * t128 - 0.10e2 * t61 * t350 * t502 + 0.8e1 * t818 * t323 - 0.4e1 * t108 * t907;
t1042 = t89 * t97;
t1055 = -0.2e1 * t168 * t595 + 0.16e2 * t484 * t771 + 0.4e1 * t11 * t125 * t129 - 0.2e1 * t173 * t444 + 0.2e1 * ZB * n * t54 * t37 * ZA * t79 - t424 * t475 + 0.2e1 * t562 * t735 - 0.2e1 * t548 * t776 + t424 * t204 + 0.2e1 * t25 * t20 * t326 + 0.8e1 * t383 * t389 * t133 + t75 * t38 * t367 + 0.2e1 * t62 * t469 + 0.2e1 * t197 * t137 * t128 - 0.2e1 * t102 * t884 - 0.2e1 * t5 * t379 - 0.8e1 * t740 * t1042 - 0.16e2 * t159 * t414 - 0.2e1 * ZB * t35 * t37 * t413 + 0.2e1 * t553 * ZB * t78 * t12;
t1096 = 0.2e1 * t443 * t904 - 0.2e1 * t268 * t329 - 0.2e1 * t443 * t601 + 0.2e1 * t102 * t974 - 0.2e1 * t263 * t673 + t424 * t165 + 0.2e1 * t62 * t713 + t424 * t308 - t424 * t313 + 0.8e1 * t347 * t22 - t424 * t598;
t1103 = t42 * t1 * t157;
t1104 = t1103 * t25;
t1108 = t3 * t19;
t1112 = n * t47;
t1113 = t9 * t9;
t1118 = t42 * t157;
t1119 = t1118 * t9;
t1120 = t25 * xc;
t1121 = t13 * t110;
t1122 = t1120 * t1121;
t1125 = t47 * t47;
t1126 = t67 * t1125;
t1127 = t1113 * ZA;
t1128 = t1126 * t1127;
t1129 = t19 * t13;
t1130 = t744 * t1129;
t1133 = t154 * t1125;
t1134 = t1133 * t9;
t1135 = t45 * t1129;
t1138 = t154 * t47;
t1139 = t25 * t30;
t1142 = t1126 * t1113;
t1145 = t125 * t1129;
t1148 = t1103 * xc;
t1149 = t3 * t13;
t1150 = t1149 * t17;
t1153 = t25 * t78;
t1156 = -0.8e1 * t1104 * t243 * t17 + 0.4e1 * t187 * t1108 * t9 - 0.2e1 * t1112 * t3 * t1113 * t30 + 0.16e2 * t1119 * t1122 + 0.64e2 * t1128 * t1130 + 0.64e2 * t1134 * t1135 - 0.2e1 * t1138 * t1139 + 0.32e2 * t1142 * t1135 - 0.32e2 * t1142 * t1145 + 0.8e1 * t1148 * t1150 - 0.2e1 * t1138 * t1153;
t1157 = t25 * t13;
t1158 = t1157 * t17;
t1161 = t13 * t17;
t1162 = t1120 * t1161;
t1165 = t3 * t78;
t1170 = t42 * t67 * t1125;
t1172 = t1108 * t13;
t1175 = t1 * t157;
t1176 = t1175 * t1113;
t1182 = t1120 * t1129;
t1189 = t110 * t9 * xc;
t1192 = t1149 * t110;
t1201 = 0.8e1 * t1103 * t1158 - 0.16e2 * t1119 * t1162 - 0.2e1 * t1112 * t1165 * t1113 + 0.32e2 * t1170 * t44 * t1172 - 0.8e1 * t1176 * t1162 + 0.8e1 * t1104 * t243 * t110 - 0.64e2 * t1134 * t1182 - 0.64e2 * t1134 * t1145 + 0.16e2 * t1118 * t3 * t1189 + 0.16e2 * t1119 * t1192 - 0.4e1 * t187 * t1165 * t9 - 0.4e1 * t187 * t1139 * t9;
t1209 = t17 * t30;
t1210 = t125 * t1209;
t1213 = t1138 * ZA;
t1214 = ZB * t30;
t1218 = t1157 * t110;
t1226 = t3 * t30;
t1237 = t1170 * t25;
t1242 = 0.4e1 * t1112 * ZA * t119 * t1113 - 0.16e2 * t1119 * t1150 - 0.8e1 * t1176 * t1210 + 0.4e1 * t1213 * t1214 * t19 - 0.16e2 * t1119 * t1218 - 0.32e2 * t1142 * t1182 - 0.8e1 * t1103 * t1120 * t110 - 0.4e1 * t187 * t1226 * t9 + 0.8e1 * t1103 * t1192 + 0.4e1 * t1112 * ZB * t1113 * t30 * ZA - 0.32e2 * t1237 * xc * t19 * t13;
t1251 = t125 * t1121;
t1260 = t1120 * t1209;
t1263 = t1139 * t19;
t1282 = 0.8e1 * t1103 * t110 * t3 * xc + 0.8e1 * t1104 * xc * t17 * t30 - 0.8e1 * t1176 * t1251 + 0.16e2 * t1119 * t1158 + 0.4e1 * t1112 * t78 * t1127 * ZB + 0.16e2 * t1119 * t1260 + 0.2e1 * t1138 * t1263 - 0.32e2 * t1170 * xc * t1172 - 0.16e2 * t1213 * t119 * t13 + 0.4e1 * t1138 * t1214 * ZA + 0.32e2 * t1237 * t44 * t19 * t13 - 0.16e2 * t1118 * t25 * t1189;
t1287 = t188 * t1129;
t1292 = t25 * t19;
t1296 = t187 * t9;
t1297 = t1226 * t19;
t1311 = t1112 * t1113;
t1317 = -0.8e1 * t1176 * t1150 + 0.32e2 * t1142 * t1287 - 0.8e1 * t1103 * t1150 + 0.2e1 * t1112 * t1292 * t1113 + 0.4e1 * t1296 * t1297 + 0.8e1 * t1176 * t1192 + 0.4e1 * t1296 * t1263 + 0.8e1 * t1176 * t1158 - 0.8e1 * t1175 * t25 * t1113 * xc * t110 + 0.2e1 * t1311 * t1297 + 0.2e1 * t1112 * t1108 * t1113;
t1320 = t253 * t1129;
t1328 = t253 * t30 * t19;
t1333 = t125 * t1161;
t1343 = ZB * t44 * t1129;
t1350 = -0.8e1 * t1176 * t1218 - 0.16e2 * t1311 * t1320 + 0.8e1 * t1176 * t1260 - 0.16e2 * t1119 * t1210 + 0.4e1 * t1311 * t1328 + 0.2e1 * t1311 * t1263 + 0.8e1 * t1176 * t1333 + 0.8e1 * t187 * ZB * t417 * t9 - 0.2e1 * t1138 * t1165 - 0.64e2 * t1128 * t1343 + 0.64e2 * t1134 * t1287 + 0.2e1 * t1138 * t1108;
t1369 = t1133 * t9 * ZA;
t1378 = t187 * ZA;
t1383 = t1170 * ZA;
t1388 = 0.2e1 * t1138 * t1297 - 0.8e1 * t1148 * t1192 + 0.2e1 * t1138 * t1292 - 0.16e2 * t1119 * t1251 + 0.8e1 * t1175 * xc * t110 * t1113 * t3 - 0.2e1 * t1112 * t1153 * t1113 + 0.128e3 * t1369 * t1130 + 0.16e2 * t1119 * t1333 + 0.4e1 * t1138 * t78 * ZA * ZB + 0.8e1 * t1378 * t78 * t9 * ZB - 0.64e2 * t1383 * t1343 + 0.64e2 * t1383 * t1130;
t1420 = 0.4e1 * t1138 * t119 * ZA - 0.128e3 * t1369 * t1343 - 0.4e1 * t187 * t1153 * t9 - 0.2e1 * t1138 * t1226 + 0.8e1 * t1296 * t1328 - 0.2e1 * t1112 * t1139 * t1113 - 0.8e1 * t1148 * t3 * t17 * t30 - 0.32e2 * t1296 * t1320 + 0.8e1 * t1176 * t1122 + 0.4e1 * t187 * t1292 * t9 + 0.8e1 * t1378 * t119 * t9 - 0.8e1 * t1103 * t1218;

C4B = (-t424 * t508 + 0.8e1 * t412 * t750 - 0.2e1 * t232 * t595 - 0.4e1 * t126 * t323 + t1096 - t76 * t204 + t728 + 0.2e1 * t548 * t827 + 0.2e1 * t150 * t469 + t398 + 0.8e1 * t189 * t146 + t260 - 0.2e1 * t351 * t184 - 0.2e1 * t268 * t673 - 0.4e1 * t319 * t279 + t464 - 0.2e1 * t108 * t461 + 0.16e2 * t740 * t369 + 0.16e2 * t274 * t216 * t754 - 0.16e2 * t70 * t139 * t591 + 0.2e1 * t55 * t56 * t128 - 0.2e1 * t359 * t89 * t111 + 0.2e1 * t734 * t563 * t111 + 0.6e1 * t223 * t224 * t97 + 0.8e1 * t383 * t389 * t103 + 0.4e1 * t606 * ZA * t326 - 0.2e1 * t93 * t18 * t316 - 0.4e1 * t443 * t27 * t128 + 0.8e1 * t197 * t27 * t199 + 0.8e1 * t108 * t109 * t128 - t249 * t604 + 0.16e2 * t70 * t616 - 0.8e1 * t969 * t323 + t845 - t424 * t579 + 0.16e2 * t159 * t162 + t290 * t406 - 0.6e1 * t150 * t864 + t192 * t116 + 0.2e1 * t867 * t326 - 0.4e1 * t658 * t326 - 0.2e1 * t351 * t502 - t76 * t165 + t900 + 0.8e1 * t168 * t323 + t791 + 0.8e1 * t740 * t915 - 0.4e1 * t562 * t750 - 0.4e1 * t278 * t342 + 0.4e1 * t319 * t431 + 0.2e1 * t173 * t175 + t424 * t528 + 0.8e1 * t969 * t129 - 0.8e1 * t347 * t181 + t332 + t530 - 0.2e1 * t108 * t329 - 0.2e1 * t207 * t38 * t37 * t1 * ZA + t1001 + 0.4e1 * t408 * t379 + t76 * t448 + 0.2e1 * t102 * t184 + 0.2e1 * t426 * t329 + 0.16e2 * t740 * t98 - t282 * t127 - 0.16e2 * t1 * t44 * t69 * t552 * t116 + 0.2e1 * t168 * t169 + 0.2e1 * t28 * t134 - t290 * t604 - 0.16e2 * t484 * t485 - 0.8e1 * t740 * t480 + 0.2e1 * t173 * t601 - 0.2e1 * t335 * t336 + t600 + 0.2e1 * t62 * t864 + t952 + 0.8e1 * t347 * t134 - t192 * t355 + t192 * t194 + 0.2e1 * t228 * t461 + t663 + 0.4e1 * t383 * t27 * t417 * t16 + 0.4e1 * t138 * t20 * ZA * t10 - 0.4e1 * t20 * ZB * ZA * t326 + 0.4e1 * t196 * t88 * t77 * t744 - 0.16e2 * t67 * xc * t179 * t181 - 0.8e1 * t95 * t480 - t249 * t488 - t76 * t475 + t1055 - 0.4e1 * t408 * t22 - 0.10e2 * t28 * t379 + 0.2e1 * t335 * t974 + t153 - 0.8e1 * t95 * t1042 - 0.2e1 * t734 * t735) / (t1156 + t1201 + t1242 + t1282 + t1317 + t1350 + t1388 + t1420);
%**************************************************************************************%
%**************************************************************************************%

if(x>=xc) % Here I had to modify the condition (x>xc) in order to produce the same results as the C code.
    C1=C1B; C2=C2B; C3=C3B; C4=C4B; Z=ZB;
else
    C1=C1A; C2=C2A; C3=C3A; C4=C4A; Z=ZA;
end
%**************************************************************************************%
%**************************************************************************************%
t1 = n * n;
t2 = t1 * t1;
t3 = t2 * n;
t4 = x * t3;
t5 = 0.3141592654e1 * 0.3141592654e1;
t6 = t5 * 0.3141592654e1;
t11 = C3 * t6;
t12 = x * n;
t13 = nx * nx;
t14 = t13 * t13;
t15 = t12 * t14;
t19 = exp(t12 * 0.3141592654e1);
t20 = t19 * t19;
t21 = t4 * t20;
t24 = C1 * t5;
t25 = Z * t20;
t29 = C1 * t6;
t30 = t29 * Z;
t31 = t1 * n;
t32 = x * t31;
t33 = t32 * t13;
t36 = t11 * x;
t41 = n * t20;
t45 = t6 * C4;
t49 = t20 * t1;
t51 = C2 * Z;
t55 = -0.2e1 * t4 * t6 * C2 * Z - 0.2e1 * t11 * t15 - 0.2e1 * t11 * t21 + 0.2e1 * t24 * t25 * t14 - t13 + 0.4e1 * t30 * t33 - 0.4e1 * t36 * t31 * t20 * t13 - 0.2e1 * t36 * t41 * t14 - 0.2e1 * t4 * t45 * t20 - t49 - 0.2e1 * t4 * t6 * t51 * t20;
t58 = t32 * t6;
t59 = C4 * t20;
t63 = t20 * t13;
t67 = t12 * t6;
t68 = t20 * t14;
t87 = t49 * t13;
t90 = -0.4e1 * t11 * t33 - 0.4e1 * t58 * t59 * t13 - 0.4e1 * t58 * t51 * t63 - 0.2e1 * t67 * t51 * t68 + 0.4e1 * t32 * t45 * t13 - 0.2e1 * t67 * t59 * t14 - 0.2e1 * t30 * t21 + t1 + 0.2e1 * t24 * t25 * t2 + 0.2e1 * t12 * t45 * t14 + 0.4e1 * t24 * Z * t87;
t106 = C3 * t5;
t120 = -0.4e1 * t30 * t32 * t63 + t63 + 0.4e1 * t24 * Z * t1 * t13 + 0.2e1 * t29 * Z * x * t3 - 0.4e1 * t58 * t51 * t13 - 0.2e1 * t106 * t2 + t32 * 0.3141592654e1 - 0.2e1 * t106 * t14 - 0.2e1 * t30 * t12 * t68 - 0.2e1 * t67 * t51 * t14 + 0.4e1 * t106 * t87;
t129 = sin(nx * 0.3141592654e1 * x);
t155 = 0.2e1 * t30 * t15 + x * 0.3141592654e1 * t41 * t13 - 0.4e1 * t19 * nx * t129 * n + t32 * 0.3141592654e1 * t20 + 0.2e1 * t106 * t68 + 0.2e1 * t106 * t20 * t2 - 0.4e1 * t106 * t1 * t13 - 0.2e1 * t11 * t4 + 0.2e1 * t4 * t45 + 0.2e1 * t24 * Z * t2 + 0.2e1 * t24 * Z * t14 + t12 * 0.3141592654e1 * t13;
t158 = t5 * Z;

u1 = (t55 + t90 + t120 + t155) / (0.4e1 * t158 * t19 * t2 + 0.8e1 * t158 * t19 * t1 * t13 + 0.4e1 * t158 * t19 * t14);
%**************************************************************************************%
%**************************************************************************************%
t1 = n * n;
t2 = t1 * n;
t3 = x * t2;
t4 = 0.3141592654e1 * 0.3141592654e1;
t5 = t4 * 0.3141592654e1;
t6 = t3 * t5;
t7 = C2 * Z;
t8 = nx * nx;
t12 = t1 * t1;
t13 = t12 * n;
t14 = x * t13;
t15 = t5 * C4;
t16 = x * n;
t18 = exp(t16 * 0.3141592654e1);
t19 = t18 * t18;
t23 = t16 * t5;
t24 = t8 * t8;
t28 = C3 * t5;
t29 = t14 * t19;
t32 = C1 * t5;
t33 = t32 * Z;
t34 = t16 * t24;
t37 = C4 * t19;
t45 = C2 * t4;
t53 = t19 * t8;
t58 = C4 * t4;
t60 = t1 * t19 * t8;
t63 = t19 * t24;
t67 = t3 * t8;
t73 = n * t19;
t86 = t28 * x;
t91 = 0.4e1 * t58 * t60 + 0.2e1 * t33 * t16 * t63 + 0.4e1 * t33 * t67 + 0.2e1 * t33 * t29 - x * 0.3141592654e1 * t73 * t8 - 0.2e1 * t53 + 0.2e1 * t32 * Z * x * t13 - 0.2e1 * t58 * t12 - 0.2e1 * t58 * t24 + t3 * 0.3141592654e1 + 0.4e1 * t86 * t2 * t19 * t8;
t94 = Z * t12;
t121 = -0.2e1 * t8 + 0.2e1 * t45 * t94 * t19 + 0.2e1 * t14 * t5 * t7 * t19 + 0.4e1 * t6 * t7 * t53 + 0.2e1 * t23 * t7 * t63 - 0.4e1 * t28 * t67 + 0.2e1 * t45 * t94 + 0.2e1 * t58 * t12 * t19 + t16 * 0.3141592654e1 * t8 + 0.2e1 * t14 * t15 - 0.2e1 * t28 * t14;
t146 = cos(nx * 0.3141592654e1 * x);
t156 = -t3 * 0.3141592654e1 * t19 + 0.2e1 * t58 * t63 - 0.4e1 * t58 * t1 * t8 + 0.4e1 * t45 * Z * t1 * t8 - 0.2e1 * t28 * t34 + 0.2e1 * t86 * t73 * t24 + 0.4e1 * t3 * t15 * t8 + 0.4e1 * t45 * Z * t60 + 0.4e1 * t18 * t146 * t8 + 0.2e1 * t45 * Z * t24 + 0.2e1 * t16 * t15 * t24;
t159 = t4 * Z;

u2 = (-0.4e1 * t6 * t7 * t8 + 0.2e1 * t14 * t15 * t19 - 0.2e1 * t23 * t7 * t24 + 0.2e1 * t28 * t29 + 0.2e1 * t33 * t34 + 0.4e1 * t6 * t37 * t8 - 0.2e1 * t14 * t5 * C2 * Z + 0.2e1 * t45 * Z * t19 * t24 + 0.2e1 * t23 * t37 * t24 + 0.4e1 * t33 * t3 * t53 + t91 + t121 + t156) / (0.4e1 * t159 * t18 * t12 + 0.8e1 * t159 * t18 * t1 * t8 + 0.4e1 * t159 * t18 * t24);
%**************************************************************************************%
%**************************************************************************************%
t1 = 0.3141592654e1 * 0.3141592654e1;
t2 = t1 * 0.3141592654e1;
t3 = C1 * t2;
t4 = t3 * Z;
t5 = n * n;
t6 = t5 * t5;
t7 = t6 * n;
t8 = x * t7;
t9 = x * n;
t11 = exp(t9 * 0.3141592654e1);
t12 = t11 * t11;
t13 = t8 * t12;
t16 = t5 * n;
t17 = x * t16;
t18 = t17 * t2;
t19 = C4 * t12;
t20 = nx * nx;
t24 = t2 * C4;
t28 = C3 * t2;
t29 = t28 * x;
t30 = t12 * n;
t31 = t20 * t20;
t40 = C2 * Z;
t44 = t9 * t2;
t48 = t12 * t20;
t52 = t17 * t20;
t57 = -0.2e1 * t4 * t13 - 0.4e1 * t18 * t19 * t20 - 0.2e1 * t8 * t24 * t12 - 0.2e1 * t29 * t30 * t31 + 0.2e1 * t8 * t2 * C2 * Z - 0.2e1 * t8 * t2 * t40 * t12 - 0.2e1 * t44 * t19 * t31 - 0.4e1 * t18 * t40 * t48 + t20 + 0.4e1 * t28 * t52 + t17 * 0.3141592654e1 * t12;
t58 = t9 * t31;
t61 = C3 * t1;
t62 = t12 * t31;
t73 = t5 * t20;
t78 = C1 * t1;
t90 = Z * t12;
t94 = 0.2e1 * t28 * t58 + 0.2e1 * t61 * t62 + 0.2e1 * t61 * t12 * t6 - 0.4e1 * t4 * t17 * t48 + 0.2e1 * t28 * t8 + 0.4e1 * t61 * t73 - 0.2e1 * t8 * t24 - 0.2e1 * t78 * Z * t6 - 0.2e1 * t44 * t40 * t62 - 0.2e1 * t78 * Z * t31 - t9 * 0.3141592654e1 * t20 + 0.2e1 * t78 * t90 * t6;
t101 = cos(nx * 0.3141592654e1 * x);
t102 = t11 * t101;
t109 = t12 * t5;
t110 = t109 * t20;
t128 = 0.2e1 * t61 * t6 - t17 * 0.3141592654e1 + 0.2e1 * t102 * t5 - 0.4e1 * t17 * t24 * t20 + 0.4e1 * t78 * Z * t110 - 0.2e1 * t9 * t24 * t31 - 0.4e1 * t4 * t52 - 0.2e1 * t4 * t9 * t62 + x * 0.3141592654e1 * t30 * t20 - t5 - 0.4e1 * t78 * Z * t5 * t20;
t156 = 0.2e1 * t78 * t90 * t31 - 0.2e1 * t3 * Z * x * t7 + t48 + 0.4e1 * t61 * t110 + 0.4e1 * t18 * t40 * t20 - 0.2e1 * t102 * t20 + 0.2e1 * t61 * t31 + 0.2e1 * t44 * t40 * t31 - t109 - 0.2e1 * t4 * t58 - 0.2e1 * t28 * t13 - 0.4e1 * t29 * t16 * t12 * t20;
t159 = t1 * t11;

u3 = (t57 + t94 + t128 + t156) / (0.4e1 * t159 * t6 + 0.8e1 * t159 * t73 + 0.4e1 * t159 * t31);
%**************************************************************************************%
%**************************************************************************************%
t1 = C2 * Z;
t2 = 0.3141592654e1 * 0.3141592654e1;
t3 = t2 * 0.3141592654e1;
t4 = n * n;
t5 = t4 * t4;
t6 = t5 * t4;
t8 = t3 * t6 * x;
t11 = x * t4;
t12 = t11 * t3;
t15 = exp(x * n * 0.3141592654e1);
t16 = t15 * t15;
t17 = C3 * t16;
t18 = nx * nx;
t19 = t18 * t18;
t23 = t5 * n;
t24 = t2 * t23;
t28 = t1 * t3;
t29 = t6 * x;
t30 = t29 * t16;
t33 = C4 * t3;
t34 = t5 * x;
t35 = t34 * t18;
t41 = sin(nx * 0.3141592654e1 * x);
t47 = t11 * t19;
t54 = t3 * C3;
t57 = 0.2e1 * t1 * t8 + 0.2e1 * t12 * t17 * t19 + 0.2e1 * t1 * t24 * t16 + 0.2e1 * t28 * t30 - 0.4e1 * t33 * t35 + 0.2e1 * t15 * nx * t41 * t4 + 0.4e1 * t28 * t35 - 0.2e1 * t33 * t47 - 0.2e1 * t1 * t24 - 0.2e1 * t33 * t29 + 0.2e1 * t29 * t54;
t58 = 0.3141592654e1 * t16;
t60 = t2 * C4;
t69 = t4 * n;
t73 = t1 * t2;
t75 = t69 * t16 * t18;
t79 = x * t16;
t83 = n * t16;
t84 = t83 * t19;
t95 = -t34 * t58 + 0.2e1 * t60 * t23 * t16 + 0.2e1 * t60 * n * t19 - t11 * 0.3141592654e1 * t18 + 0.4e1 * t60 * t69 * t18 + 0.4e1 * t73 * t75 + 0.4e1 * t33 * t5 * t79 * t18 + 0.2e1 * t73 * t84 + 0.2e1 * t60 * t84 + 0.2e1 * t33 * t4 * t79 * t19 + 0.4e1 * t60 * t75;
t97 = t34 * t3;
t101 = Z * C1;
t102 = t16 * t19;
t106 = t16 * t18;
t127 = t2 * t69;
t131 = t2 * n;
t135 = 0.4e1 * t97 * t17 * t18 + 0.2e1 * t12 * t101 * t102 + 0.4e1 * t28 * t34 * t106 + 0.2e1 * t28 * t11 * t102 - 0.2e1 * t29 * t3 * Z * C1 - 0.4e1 * t97 * t101 * t18 - 0.2e1 * t12 * t101 * t19 + 0.2e1 * t60 * t23 - 0.2e1 * t83 * t18 - 0.4e1 * t1 * t127 * t18 - 0.2e1 * t1 * t131 * t19;
t164 = 0.2e1 * t28 * t47 + 0.2e1 * t11 * t54 * t19 + 0.2e1 * t8 * t101 * t16 + 0.2e1 * t33 * t30 - t11 * t58 * t18 + 0.2e1 * t29 * t54 * t16 + 0.4e1 * t34 * t54 * t18 + 0.4e1 * t97 * t101 * t106 - 0.2e1 * t15 * t18 * nx * t41 - t34 * 0.3141592654e1 + 0.2e1 * n * t18;

u4 = (t57 + t95 + t135 + t164) / (0.4e1 * t24 * t15 + 0.8e1 * t127 * t15 * t18 + 0.4e1 * t131 * t15 * t19);


%**************************************************************************************%
%**************************************************************************************%


u5 = (-2*Z*n*PI*u2-u3*2*n*PI)*cos(n*PI*z); % pressure %

u6 = (u3*2*n*PI + 4*Z*n*PI*u2)*cos(n*PI*z); % zz stress %
sum5 = sum5 + u5;
sum6 = sum6 + u6;

u1 = u1 * cos(n*PI*z); % x velocity
sum1 = sum1 + u1;
u2 = u2 * sin(n*PI*z); % z velocity
sum2 = sum2 + u2;
u3 = u3 * 2*n*PI*cos(n*PI*z); % xx stress
sum3 = sum3 + u3;
u4 = u4 * 2*n*PI*sin(n*PI*z); % zx stress
sum4 = sum4 + u4;


mag=sqrt(sum1*sum1+sum2*sum2);

% 	% Output %
% 	if( vel != NULL ) {
sol.vx = sum1;
sol.vz = sum2;
% 	}
% 	if( pressure != NULL )
sol.P = sum5;
%     end
% 	if( total_stress != NULL ) {
% 		total_stress[0] = sum3;
% 		total_stress[1] = sum6;
% 		total_stress[2] = sum4;
% 	}
% 	if( strain_rate != NULL )
% 		if( x>xc ) {
% 			Z = ZB;
% 		}
% 		else {
% 			Z = ZA;
% 		}
% 		strain_rate[0] = (sum3+sum5)/(2.0*Z);
% 		strain_rate[1] = (sum6+sum5)/(2.0*Z);
% 		strain_rate[2] = (sum4)/(2.0*Z);
% 	}

end
