# Supplementary material for: Practical analytical solutions for benchmarking of 2-D and 3-D geodynamic Stokes problems with variable viscosity
Source: Copernicus journal article supplement (doi:10.5194/se-5-461-2014), 2014-06-10
Supplement: Supplementary file 2 [file se-5-461-2014-supplement.zip › supplement/code/eval_sol_kz.m]

function sol = eval_sol_kz( x, z )

    M_PI = 3.14159265358979323846264338328;

    %************************************************************************%
	%************************************************************************%
	% rho = -sigma*sin(km*z)*cos(kn*x)  
	% viscosity  Z= exp(2*B*z) 
	B     = 6.9; % viscosity parameter must be non-zero 
	km    = 1.6*M_PI; % solution valid for km not zero -- should get trivial solution if km=0 
	n     = 3; % solution valid for n not zero 
	sigma = 1.0;
	%************************************************************************%
	%************************************************************************%
	kn = 3*M_PI;
	a  = B*B + kn*kn;
	b  = 2.0*kn*B;
	r  = sqrt(a*a + b*b);
	Rp = sqrt( (r+a)/2.0 );
	Rm = sqrt( (r-a)/2.0 );
	UU = Rp - B;
	VV = Rp + B;
	
	sum1=0.0;
	sum2=0.0;
	sum3=0.0;
	sum4=0.0;
	sum5=0.0;
	sum6=0.0;
	sum7=0.0;
	
	
	
	
	%*******************************************%
	%          calculate the constants          %
	%*******************************************%
	
	t3 = kn * kn;
	t4 = km * km;
	t6 = B * B;
	t8 = 0.4e1 * t3 * t6;
	t10 = 0.4e1 * t4 * t6;
	t13 = 0.8e1 * kn * t6 * km;
	t14 = t4 * t4;
	t16 = 0.2e1 * t3 * t4;
	t17 = t3 * t3;
	aa = -0.4e1 * B * km * kn * (t3 + t4) / (t8 + t10 + t13 + t14 + t16 + t17) / (-t13 + t8 + t10 + t14 + t16 + t17);
	
	t1 = kn * kn;
	t2 = t1 * t1;
	t3 = B * B;
	t5 = 0.4e1 * t1 * t3;
	t6 = km * km;
	t7 = t6 * t6;
	t9 = 0.2e1 * t1 * t6;
	t11 = 0.4e1 * t3 * t6;
	t16 = 0.8e1 * kn * t3 * km;
	bb = kn * (t2 + t5 + t7 + t9 - t11) / (t5 + t11 + t16 + t7 + t9 + t2) / (-t16 + t5 + t11 + t7 + t9 + t2);
	
	AA = aa;
	BB = bb;
	
	t1 = B * B;
	t2 = t1 * Rp;
	t4 = Rm * Rm;
	t5 = t4 * Rp;
	t7 = t4 * B;
	t8 = km * km;
	t12 = Rp * Rp;
	t13 = B * t12;
	t21 = 0.8e1 * t1 * km * BB * Rp;
	t23 = 0.2e1 * Rm;
	t24 = cos(t23);
	t26 = Rm * Rp;
	t38 = sin(t23);
	t51 = exp(-0.2e1 * Rp);
	t53 = B + Rp;
	t54 = Rm * t53;
	t55 = Rm * B;
	t57 = 0.2e1 * B * km;
	t58 = t55 + t57 - t26;
	t62 = 0.3e1 * t1;
	t64 = 0.2e1 * Rp * B;
	t65 = t62 + t64 + t4 - t8 - t12;
	t67 = t54 * t65 * BB;
	t69 = Rm - km;
	t70 = cos(t69);
	t72 = -t57 + t55 - t26;
	t77 = Rm + km;
	t78 = cos(t77);
	t81 = t54 * t65 * AA;
	t86 = sin(t77);
	t92 = sin(t69);
	t96 = exp(-t53);
	t98 = B - Rp;
	t99 = Rm * t98;
	t100 = t55 + t57 + t26;
	t104 = t62 - t64 + t4 - t8 - t12;
	t106 = t99 * t104 * BB;
	t109 = -t57 + t55 + t26;
	t116 = t99 * t104 * AA;
	t130 = exp(-0.3e1 * Rp - B);
	t135 = exp(-0.4e1 * Rp);
	t144 = t4 * t1;
	t150 = t4 * t12;
	C1 = (((0.2e1 * Rp * (0.2e1 * t2 + 0.2e1 * t5 + t7 + B * t8 - 0.3e1 * t1 * B + t13) * AA + t21) * t24 + (-0.2e1 * t26 * (t4 - t8 - t12 + 0.5e1 * t1) * AA + 0.8e1 * B * BB * km * Rm * Rp) * t38 - 0.2e1 * B * (0.2e1 * t13 + t12 * Rp - 0.3e1 * t2 + t5 + 0.2e1 * t7 + t8 * Rp) * AA - t21) * t51 + ((0.2e1 * t54 * t58 * AA + t67) * t70 + (0.2e1 * t54 * t72 * AA - t67) * t78 + (t81 + 0.2e1 * t54 * t72 * BB) * t86 + (t81 - 0.2e1 * t54 * t58 * BB) * t92) * t96 + ((-0.2e1 * t99 * t100 * AA - t106) * t70 + (-0.2e1 * t99 * t109 * AA + t106) * t78 + (-t116 - 0.2e1 * t99 * t109 * BB) * t86 + (-t116 + 0.2e1 * t99 * t100 * BB) * t92) * t130 + 0.4e1 * t4 * t98 * t53 * AA * t135) / (((-0.8e1 * t4 - 0.8e1 * t1) * t12 * t24 + 0.8e1 * t144 + 0.8e1 * t12 * t1) * t51 + (0.4e1 * t150 - 0.4e1 * t144) * t135 + 0.4e1 * t150 - 0.4e1 * t144);
	
	t1 = Rm * Rp;
	t2 = Rm * Rm;
	t3 = km * km;
	t4 = Rp * Rp;
	t5 = B * B;
	t12 = km * Rm;
	t17 = 0.2e1 * Rm;
	t18 = cos(t17);
	t22 = t2 * Rp;
	t25 = B * t3;
	t26 = t5 * B;
	t33 = t5 * km;
	t38 = sin(t17);
	t40 = Rm * B;
	t41 = 0.3e1 * t5;
	t51 = exp(-0.2e1 * Rp);
	t53 = B + Rp;
	t54 = Rm * t53;
	t57 = t41 + 0.2e1 * Rp * B + t2 - t3 - t4;
	t59 = t54 * t57 * AA;
	t60 = B * km;
	t61 = 0.2e1 * t60;
	t62 = t40 + t61 - t1;
	t67 = Rm - km;
	t68 = cos(t67);
	t70 = -t61 + t40 - t1;
	t75 = Rm + km;
	t76 = cos(t75);
	t82 = t54 * t57 * BB;
	t84 = sin(t75);
	t90 = sin(t67);
	t94 = exp(-t53);
	t97 = 0.3e1 * Rm * t26;
	t98 = t2 * Rm;
	t99 = t98 * B;
	t100 = t3 * Rm;
	t101 = t100 * Rp;
	t103 = Rm * t4 * B;
	t104 = t4 * Rp;
	t105 = Rm * t104;
	t107 = 0.8e1 * t33 * Rp;
	t109 = 0.5e1 * t1 * t5;
	t110 = t98 * Rp;
	t111 = t100 * B;
	t112 = t97 + t99 - t101 + t103 - t105 + t107 + t109 + t110 - t111;
	t114 = t2 * t4;
	t116 = 0.2e1 * t60 * t1;
	t117 = t2 * t5;
	t119 = 0.3e1 * t26 * Rp;
	t120 = t104 * B;
	t121 = t4 * t5;
	t122 = 0.2e1 * t121;
	t123 = t22 * B;
	t125 = 0.2e1 * t33 * Rm;
	t126 = t25 * Rp;
	t127 = t114 + t116 + t117 - t119 + t120 + t122 + t123 + t125 + t126;
	t132 = -t107 + t103 - t105 - t101 + t97 - t111 + t110 + t109 + t99;
	t134 = t120 - t125 + t123 - t116 + t122 + t117 + t114 + t126 - t119;
	t152 = exp(-0.3e1 * Rp - B);
	t161 = exp(-0.4e1 * Rp);
	C2 = (((0.2e1 * t1 * (t2 - t3 - t4 + 0.5e1 * t5) * AA - 0.8e1 * B * BB * t12 * Rp) * t18 + (0.2e1 * Rp * (0.2e1 * t5 * Rp + 0.2e1 * t22 + t2 * B + t25 - 0.3e1 * t26 + B * t4) * AA + 0.8e1 * t33 * BB * Rp) * t38 + 0.2e1 * t40 * (t41 + t4 + t2 - t3) * AA - 0.8e1 * t5 * BB * t12) * t51 + ((-t59 + 0.2e1 * t54 * t62 * BB) * t68 + (-t59 - 0.2e1 * t54 * t70 * BB) * t76 + (0.2e1 * t54 * t70 * AA - t82) * t84 + (0.2e1 * t54 * t62 * AA + t82) * t90) * t94 + ((t112 * AA - 0.2e1 * t127 * BB) * t68 + (t132 * AA + 0.2e1 * t134 * BB) * t76 + (-0.2e1 * t134 * AA + t132 * BB) * t84 + (-0.2e1 * t127 * AA - t112 * BB) * t90) * t152 + (-0.2e1 * t59 + 0.8e1 * t40 * km * t53 * BB) * t161) / (((-0.8e1 * t2 - 0.8e1 * t5) * t4 * t18 + 0.8e1 * t117 + 0.8e1 * t121) * t51 + (0.4e1 * t114 - 0.4e1 * t117) * t161 + 0.4e1 * t114 - 0.4e1 * t117);
	
	t1 = B * B;
	t2 = t1 * Rp;
	t4 = Rm * Rm;
	t5 = t4 * Rp;
	t7 = Rp * Rp;
	t8 = B * t7;
	t11 = km * km;
	t13 = t4 * B;
	t21 = 0.8e1 * t1 * km * BB * Rp;
	t23 = 0.2e1 * Rm;
	t24 = cos(t23);
	t26 = Rm * Rp;
	t38 = sin(t23);
	t51 = exp(-0.2e1 * Rp);
	t53 = B + Rp;
	t54 = Rm * t53;
	t55 = Rm * B;
	t57 = 0.2e1 * B * km;
	t58 = t55 + t57 - t26;
	t62 = 0.3e1 * t1;
	t64 = 0.2e1 * Rp * B;
	t65 = t62 + t64 + t4 - t11 - t7;
	t67 = t54 * t65 * BB;
	t69 = Rm - km;
	t70 = cos(t69);
	t72 = -t57 + t55 - t26;
	t77 = Rm + km;
	t78 = cos(t77);
	t81 = t54 * t65 * AA;
	t86 = sin(t77);
	t92 = sin(t69);
	t96 = exp(-t53);
	t98 = B - Rp;
	t99 = Rm * t98;
	t100 = t55 + t57 + t26;
	t104 = t62 - t64 + t4 - t11 - t7;
	t106 = t99 * t104 * BB;
	t109 = -t57 + t55 + t26;
	t116 = t99 * t104 * AA;
	t130 = exp(-0.3e1 * Rp - B);
	t141 = t4 * t1;
	t147 = t4 * t7;
	t151 = exp(-0.4e1 * Rp);
	C3 = (((-0.2e1 * Rp * (-0.2e1 * t2 - 0.2e1 * t5 + t8 - 0.3e1 * t1 * B + B * t11 + t13) * AA - t21) * t24 + (0.2e1 * t26 * (t4 - t11 - t7 + 0.5e1 * t1) * AA - 0.8e1 * B * BB * km * Rm * Rp) * t38 - 0.2e1 * B * (0.2e1 * t8 + 0.2e1 * t13 + 0.3e1 * t2 - t7 * Rp - t5 - t11 * Rp) * AA + t21) * t51 + ((-0.2e1 * t54 * t58 * AA - t67) * t70 + (-0.2e1 * t54 * t72 * AA + t67) * t78 + (-t81 - 0.2e1 * t54 * t72 * BB) * t86 + (-t81 + 0.2e1 * t54 * t58 * BB) * t92) * t96 + ((0.2e1 * t99 * t100 * AA + t106) * t70 + (0.2e1 * t99 * t109 * AA - t106) * t78 + (t116 + 0.2e1 * t99 * t109 * BB) * t86 + (t116 - 0.2e1 * t99 * t100 * BB) * t92) * t130 + 0.4e1 * t4 * t98 * t53 * AA) / (((-0.8e1 * t4 - 0.8e1 * t1) * t7 * t24 + 0.8e1 * t141 + 0.8e1 * t7 * t1) * t51 + (0.4e1 * t147 - 0.4e1 * t141) * t151 + 0.4e1 * t147 - 0.4e1 * t141);
	
	t1 = Rm * Rp;
	t2 = Rm * Rm;
	t3 = km * km;
	t4 = Rp * Rp;
	t5 = B * B;
	t12 = km * Rm;
	t17 = 0.2e1 * Rm;
	t18 = cos(t17);
	t22 = t2 * Rp;
	t25 = t5 * B;
	t27 = B * t3;
	t33 = t5 * km;
	t38 = sin(t17);
	t40 = Rm * B;
	t41 = 0.3e1 * t5;
	t51 = exp(-0.2e1 * Rp);
	t53 = t2 * Rm;
	t54 = t53 * B;
	t56 = 0.5e1 * t1 * t5;
	t58 = Rm * t4 * B;
	t59 = t3 * Rm;
	t60 = t59 * Rp;
	t62 = 0.8e1 * t33 * Rp;
	t64 = 0.3e1 * Rm * t25;
	t65 = t53 * Rp;
	t66 = t59 * B;
	t67 = t4 * Rp;
	t68 = Rm * t67;
	t69 = t54 - t56 + t58 + t60 - t62 + t64 - t65 - t66 + t68;
	t71 = t2 * t4;
	t73 = 0.3e1 * t25 * Rp;
	t74 = t2 * t5;
	t75 = t27 * Rp;
	t76 = B * km;
	t78 = 0.2e1 * t76 * t1;
	t80 = 0.2e1 * t33 * Rm;
	t81 = t22 * B;
	t82 = t4 * t5;
	t83 = 0.2e1 * t82;
	t84 = t67 * B;
	t85 = t71 + t73 + t74 - t75 - t78 + t80 - t81 + t83 - t84;
	t89 = Rm - km;
	t90 = cos(t89);
	t92 = t60 - t66 - t65 + t58 + t54 - t56 + t62 + t68 + t64;
	t94 = t73 + t78 - t81 + t74 - t80 - t84 - t75 + t83 + t71;
	t98 = Rm + km;
	t99 = cos(t98);
	t105 = sin(t98);
	t111 = sin(t89);
	t115 = exp(-Rp - B);
	t117 = B - Rp;
	t118 = Rm * t117;
	t121 = t41 - 0.2e1 * Rp * B + t2 - t3 - t4;
	t123 = t118 * t121 * AA;
	t124 = 0.2e1 * t76;
	t125 = t40 + t124 + t1;
	t131 = -t124 + t40 + t1;
	t141 = t118 * t121 * BB;
	t152 = exp(-0.3e1 * Rp - B);
	t171 = exp(-0.4e1 * Rp);
	C4 = (((-0.2e1 * t1 * (t2 - t3 - t4 + 0.5e1 * t5) * AA + 0.8e1 * B * BB * t12 * Rp) * t18 + (-0.2e1 * Rp * (-0.2e1 * t5 * Rp - 0.2e1 * t22 + t4 * B - 0.3e1 * t25 + t27 + t2 * B) * AA - 0.8e1 * t33 * BB * Rp) * t38 + 0.2e1 * t40 * (t41 + t4 + t2 - t3) * AA - 0.8e1 * t5 * BB * t12) * t51 + ((t69 * AA - 0.2e1 * t85 * BB) * t90 + (t92 * AA + 0.2e1 * t94 * BB) * t99 + (-0.2e1 * t94 * AA + t92 * BB) * t105 + (-0.2e1 * t85 * AA - t69 * BB) * t111) * t115 + ((-t123 + 0.2e1 * t118 * t125 * BB) * t90 + (-t123 - 0.2e1 * t118 * t131 * BB) * t99 + (0.2e1 * t118 * t131 * AA - t141) * t105 + (0.2e1 * t118 * t125 * AA + t141) * t111) * t152 - 0.2e1 * t123 + 0.8e1 * t40 * km * t117 * BB) / (((-0.8e1 * t2 - 0.8e1 * t5) * t4 * t18 + 0.8e1 * t74 + 0.8e1 * t82) * t51 + (0.4e1 * t71 - 0.4e1 * t74) * t171 + 0.4e1 * t71 - 0.4e1 * t74);
	
	%******************************************************************%
	%******************************************************************%
	
	%*******************************************%
	%*       calculate the velocities etc      *%
	%*******************************************%
	
	t2 = exp(UU * z);
	t3 = Rm * z;
	t4 = cos(t3);
	t6 = sin(t3);
	t11 = exp(-VV * z);
	t18 = exp(-0.2e1 * z * B);
	t19 = km * z;
	t20 = cos(t19);
	t22 = sin(t19);
	u1 = kn * (t2 * (C1 * t4 + C2 * t6) + t11 * (C3 * t4 + C4 * t6) + t18 * (AA * t20 + BB * t22));
	
	t1 = Rm * z;
	t2 = cos(t1);
	t4 = sin(t1);
	t14 = exp(UU * z);
	t26 = exp(-VV * z);
	t28 = km * z;
	t29 = cos(t28);
	t31 = sin(t28);
	t43 = exp(-0.2e1 * z * B);
	u2 = (-UU * (C1 * t2 + C2 * t4) + C1 * t4 * Rm - C2 * t2 * Rm) * t14 + (VV * (C3 * t2 + C4 * t4) + C3 * t4 * Rm - C4 * t2 * Rm) * t26 + (0.2e1 * B * (AA * t29 + BB * t31) + AA * t31 * km - BB * t29 * km) * t43;
	
	t2 = 0.2e1 * z * B;
	t3 = exp(t2);
	t4 = t3 * kn;
	t5 = Rm * z;
	t6 = cos(t5);
	t8 = sin(t5);
	t18 = exp(UU * z);
	t31 = exp(-VV * z);
	t34 = km * z;
	t35 = cos(t34);
	t37 = sin(t34);
	t47 = exp(-t2);
	u3 = 0.2e1 * t4 * (UU * (C1 * t6 + C2 * t8) - C1 * t8 * Rm + C2 * t6 * Rm) * t18 + 0.2e1 * t4 * (-VV * (C3 * t6 + C4 * t8) - C3 * t8 * Rm + C4 * t6 * Rm) * t31 + 0.2e1 * t4 * (-0.2e1 * B * (AA * t35 + BB * t37) - AA * t37 * km + BB * t35 * km) * t47;
	
	t1 = Rm * Rm;
	t3 = UU * UU;
	t8 = kn * kn;
	t11 = Rm * z;
	t12 = sin(t11);
	t14 = cos(t11);
	t20 = t14 * Rm;
	t27 = 0.2e1 * z * B;
	t28 = exp(t27);
	t31 = exp(UU * z);
	t38 = VV * VV;
	t54 = exp(-VV * z);
	t56 = km * km;
	t59 = B * B;
	t66 = km * z;
	t67 = sin(t66);
	t69 = cos(t66);
	t83 = exp(-t27);
	u4 = ((C2 * t1 - t3 * C2 + 0.2e1 * UU * C1 * Rm - C2 * t8) * t12 + C1 * t14 * t1 - t3 * C1 * t14 - 0.2e1 * UU * C2 * t20 - t8 * C1 * t14) * t28 * t31 + ((-0.2e1 * VV * C3 * Rm + C4 * t1 - C4 * t8 - t38 * C4) * t12 + 0.2e1 * VV * C4 * t20 + C3 * t14 * t1 - t8 * C3 * t14 - t38 * C3 * t14) * t28 * t54 + ((BB * t56 - t8 * BB - 0.4e1 * t59 * BB - 0.4e1 * B * AA * km) * t67 + AA * t69 * t56 - t8 * AA * t69 - 0.4e1 * t59 * AA * t69 + 0.4e1 * B * BB * t69 * km) * t28 * t83;
	
	
	t1 = Rm * z;
	t2 = sin(t1);
	t3 = Rm * Rm;
	t4 = t3 * Rm;
	t5 = t2 * t4;
	t6 = UU * UU;
	t7 = t6 * UU;
	t8 = cos(t1);
	t15 = 0.2e1 * B * t8 * t3;
	t19 = B * UU;
	t20 = t2 * Rm;
	t23 = kn * kn;
	t24 = B * t23;
	t26 = 0.2e1 * t24 * t8;
	t27 = t23 * UU;
	t29 = B * t6;
	t33 = t23 * t2 * Rm;
	t35 = 0.1e1 / kn;
	t42 = 0.2e1 * B * t2 * t3;
	t43 = t8 * t4;
	t45 = 0.2e1 * t24 * t2;
	t52 = t23 * t8 * Rm;
	t53 = t8 * Rm;
	t64 = 0.2e1 * z * B;
	t65 = exp(t64);
	t68 = exp(UU * z);
	t70 = B * VV;
	t76 = t23 * VV;
	t78 = VV * VV;
	t79 = t78 * VV;
	t84 = B * t78;
	t108 = exp(-VV * z);
	t111 = km * z;
	t112 = sin(t111);
	t113 = km * km;
	t118 = cos(t111);
	t119 = t118 * km;
	t121 = B * B;
	t123 = t112 * km;
	t130 = t113 * km;
	t148 = exp(-t64);
	u5 = (-(-t5 - t7 * t8 + 0.3e1 * UU * t8 * t3 + t15 + 0.3e1 * t6 * t2 * Rm + 0.4e1 * t19 * t20 - t26 + t27 * t8 - 0.2e1 * t29 * t8 - t33) * t35 * C1 - (-t7 * t2 + t27 * t2 + t42 + t43 - t45 + 0.3e1 * UU * t2 * t3 - 0.2e1 * t29 * t2 + t52 - 0.4e1 * t19 * t53 - 0.3e1 * t6 * t8 * Rm) * t35 * C2) * t65 * t68 + (-(t15 - 0.4e1 * t70 * t20 - t33 - 0.3e1 * VV * t8 * t3 - t76 * t8 + t79 * t8 + 0.3e1 * t78 * t2 * Rm - 0.2e1 * t84 * t8 - t26 - t5) * t35 * C3 - (t52 - 0.3e1 * VV * t2 * t3 + t79 * t2 + 0.4e1 * t70 * t53 - 0.3e1 * t78 * t8 * Rm - 0.2e1 * t84 * t2 + t43 - t76 * t2 + t42 - t45) * t35 * C4) * t65 * t108 - t65 * (-0.4e1 * B * BB * t112 * t113 + t23 * BB * t119 + 0.4e1 * t121 * AA * t123 - 0.4e1 * t121 * BB * t119 + BB * t118 * t130 - AA * t112 * t130 - 0.4e1 * B * AA * t118 * t113 - t23 * AA * t123 - 0.4e1 * t24 * AA * t118 - 0.4e1 * t24 * BB * t112) * t35 * t148;
	
	
	
	t2 = 0.2e1 * z * B;
	t3 = exp(t2);
	t4 = t3 * kn;
	t5 = Rm * z;
	t6 = cos(t5);
	t8 = sin(t5);
	t18 = exp(UU * z);
	t31 = exp(-VV * z);
	t34 = km * z;
	t35 = cos(t34);
	t37 = sin(t34);
	t47 = exp(-t2);
	u6 = -0.2e1 * t4 * (UU * (C1 * t6 + C2 * t8) - C1 * t8 * Rm + C2 * t6 * Rm) * t18 - 0.2e1 * t4 * (-VV * (C3 * t6 + C4 * t8) - C3 * t8 * Rm + C4 * t6 * Rm) * t31 - 0.2e1 * t4 * (-0.2e1 * B * (AA * t35 + BB * t37) - AA * t37 * km + BB * t35 * km) * t47;
	
	
	
	
	%******************************************************************%
	%******************************************************************%
	
	
	
	sum5 = sum5 + u5*cos(n*M_PI*x);  % pressure 
	u6   = u6 - u5; % get total stress 
	sum6 = sum6 + u6*cos(n*M_PI*x);  % xx stress 
	
	u1   = u1 * cos(n*M_PI*x); % z velocity 
	sum1 = sum1 + u1;
	u2   = u2 * sin(n*M_PI*x); % x velocity 
	sum2 = sum2 + u2;
	u3   = u3 - u5; % get total stress 
	u3   = u3 * cos(n*M_PI*x); % zz stress 
	sum3 = sum3 + u3;
	u4   = u4 * sin(n*M_PI*x); % zx stress 
	sum4 = sum4 + u4;
	
	rho  = -sigma*sin(km*z)*cos(kn*x); % density 
	sum7 = sum7 + rho;
	
	SS = exp(UU*z)*(C1*cos(Rm*z)+C2*sin(Rm*z)) +exp(-VV*z)*(C3*cos(Rm*z)+C4*sin(Rm*z)) + exp(-2*z*B)*(AA*cos(km*z)+BB*sin(km*z));
	SS = SS * sin(kn*x); % stream function 
	
	mag=sqrt(u1*u1+u2*u2);
	
	
	% Output 
% 	if( vel != NULL ) {
		sol.vx = sum2;
		sol.vz = sum1;
% 	}
% 	if( presssure != NULL ) {
		sol.P   = sum5;
        sol.rho = sum7;
        sol.eta = exp( 2.0 * B * z );
% 	}
% 	if( total_stress != NULL ) {
% 		total_stress[0] = sum6;
% 		total_stress[1] = sum3;
% 		total_stress[2] = sum4;
% 	}
% 	if( strain_rate != NULL ) {
% 		/* sigma = tau - p, tau = sigma + p, tau[] = 2*eta*strain_rate[] */
% 		Z = exp( 2.0 * B * z );
% 		strain_rate[0] = (sum6+sum5)/(2.0*Z);
% 		strain_rate[1] = (sum3+sum5)/(2.0*Z);
% 		strain_rate[2] = (sum4)/(2.0*Z);
% 	}
% 	/* Value checks, could be cleaned up if needed. Julian Giordani 9-Oct-2006*/
% 	if( fabs( sum5 - ( -0.5*(sum6+sum3) ) ) > 1e-5 ) {
% 		assert(0);
% 	}
% }


end
