# Supplementary material for: Practical analytical solutions for benchmarking of 2-D and 3-D geodynamic Stokes problems with variable viscosity
Source: Copernicus journal article supplement (doi:10.5194/se-5-461-2014), 2014-06-10
Supplement: Supplementary file 3 [file se-5-461-2014-supplement.zip]

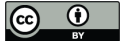

## *Supplement of*

# **Practical analytical solutions for benchmarking of 2-D and 3-D geodynamic Stokes problems with variable viscosity**

**I. Yu. Popov et al.**

*Correspondence to:* I. Yu. Popov (popov1955@gmail.com)

- Supplement-Cover-Letter.pdf
- supplement
  - code
    - \* Stokes\_Continuity3D\_prolongation.m
    - \* Stokes\_Continuity3D\_viscous\_restriction.m
    - \* Stokes\_Continuity3D\_viscous\_smoother.m
    - \* Variable\_viscosity3D\_tests2.m
    - \* Viscosity\_restriction3D.m
    - \* eval\_anal\_Dani.m
    - \* eval\_sol\_cx.m
    - \* eval\_sol\_kz.m
    - \* for code user.doc
    - \* sol\_visc3d.asv
    - \* sol\_visc3d.m
    - \* *r* code user.doc
  - figures for supplement
    - \* fig\_1\_2D\_high\_exp.jpg
    - \* fig\_1\_2D\_high\_lin.jpg
    - \* fig\_1\_2D\_low\_exp.jpg
    - \* fig\_1\_2D\_low\_lin.jpg
    - \* fig\_1a\_3D\_low.jpg
    - \* fig\_1a\_high.jpg
    - \* fig\_1a\_high\_lin.jpg
    - \* fig\_1a\_low\_lin.jpg
    - \* fig\_1b\_3D\_low.jpg
    - \* fig\_1b\_high.jpg
    - \* fig\_1b\_high\_lin.jpg

- \* fig\_1b\_low\_lin.jpg
- \* fig\_3\_2D\_high\_exp.jpg
- \* fig\_3\_2D\_high\_lin.jpg
- \* fig\_3\_2D\_low\_exp.jpg
- \* fig\_3\_2D\_low\_lin.jpg
- \* fig\_3\_3D\_low.jpg
- \* fig\_3\_high.jpg
- \* fig\_3\_high\_lin.jpg
- \* fig\_3\_low\_lin.jpg
- \* fig\_4\_2D\_high\_exp.jpg
- \* fig\_4\_2D\_high\_lin.jpg
- \* fig\_4\_2D\_low\_exp.jpg
- \* fig\_4\_2D\_low\_lin.jpg
- \* fig\_4\_3D\_low.jpg
- \* fig\_4\_high.jpg
- \* fig\_4\_high\_lin.jpg
- \* fig\_4\_low\_lin.jpg
- supplement.pdf
- supplement.tex
