# Supplementary figures and images for: Practical analytical solutions for benchmarking of 2-D and 3-D geodynamic Stokes problems with variable viscosity
Source: Copernicus journal article supplement (doi:10.5194/se-5-461-2014), 2014-06-10

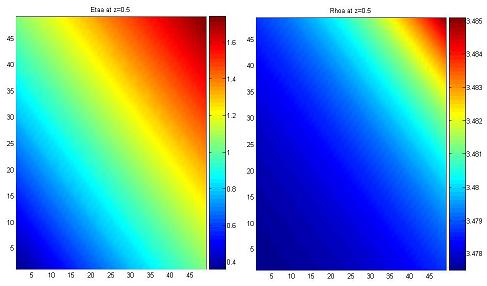

Supplement: Supplementary file 2 [file se-5-461-2014-supplement.zip › supplement/figures for supplement/fig_4_3D_low.jpg]

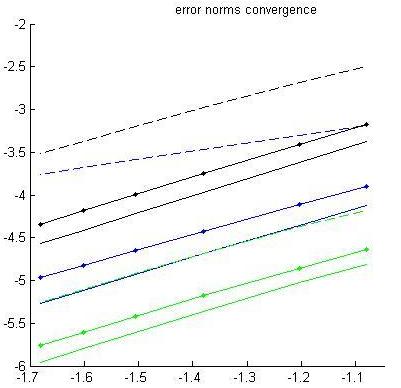

Supplement: Supplementary file 2 [file se-5-461-2014-supplement.zip › supplement/figures for supplement/fig_3_2D_low_exp.jpg]

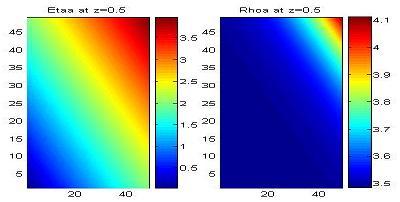

Supplement: Supplementary file 2 [file se-5-461-2014-supplement.zip › supplement/figures for supplement/fig_4_2D_high_exp.jpg]

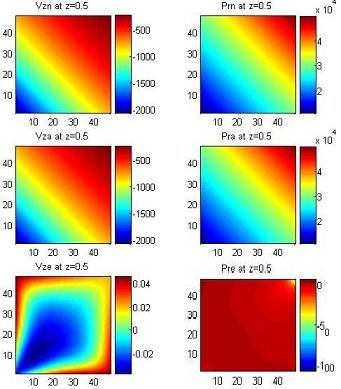

Supplement: Supplementary file 2 [file se-5-461-2014-supplement.zip › supplement/figures for supplement/fig_1b_3D_low.jpg]

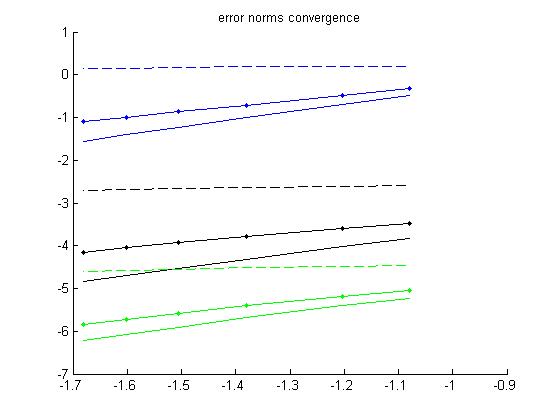

Supplement: Supplementary file 2 [file se-5-461-2014-supplement.zip › supplement/figures for supplement/fig_3_2D_high_lin.jpg]

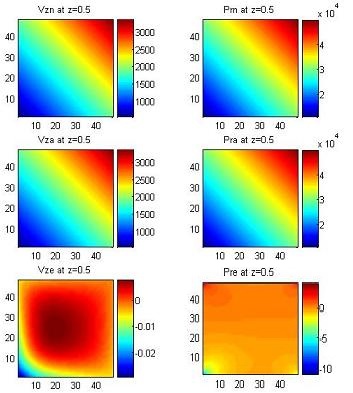

Supplement: Supplementary file 2 [file se-5-461-2014-supplement.zip › supplement/figures for supplement/fig_1b_low_lin.jpg]

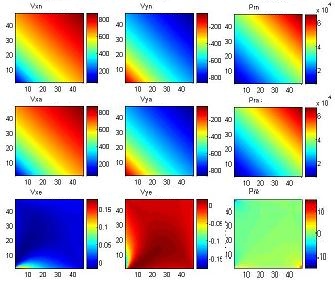

Supplement: Supplementary file 2 [file se-5-461-2014-supplement.zip › supplement/figures for supplement/fig_1_2D_low_lin.jpg]

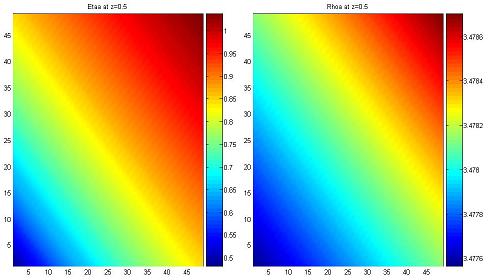

Supplement: Supplementary file 2 [file se-5-461-2014-supplement.zip › supplement/figures for supplement/fig_4_low_lin.jpg]

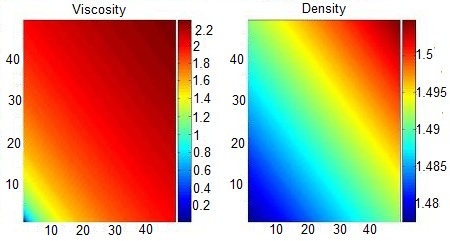

Supplement: Supplementary file 2 [file se-5-461-2014-supplement.zip › supplement/figures for supplement/fig_4_2D_high_lin.jpg]

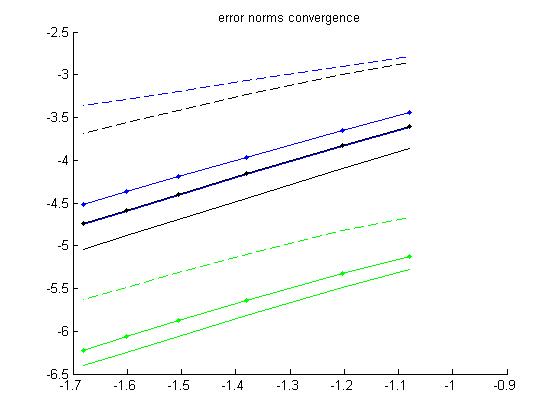

Supplement: Supplementary file 2 [file se-5-461-2014-supplement.zip › supplement/figures for supplement/fig_3_2D_low_lin.jpg]

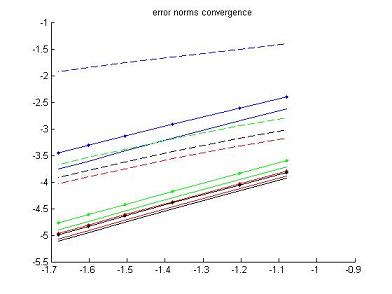

Supplement: Supplementary file 2 [file se-5-461-2014-supplement.zip › supplement/figures for supplement/fig_3_3D_low.jpg]

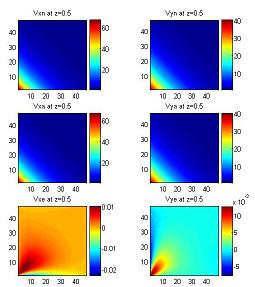

Supplement: Supplementary file 2 [file se-5-461-2014-supplement.zip › supplement/figures for supplement/fig_1a_high.jpg]

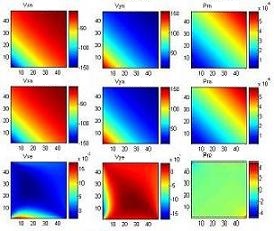

Supplement: Supplementary file 2 [file se-5-461-2014-supplement.zip › supplement/figures for supplement/fig_1_2D_low_exp.jpg]

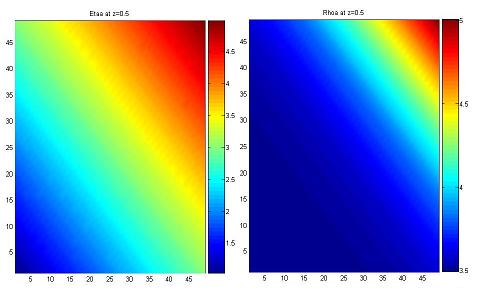

Supplement: Supplementary file 2 [file se-5-461-2014-supplement.zip › supplement/figures for supplement/fig_4_high.jpg]

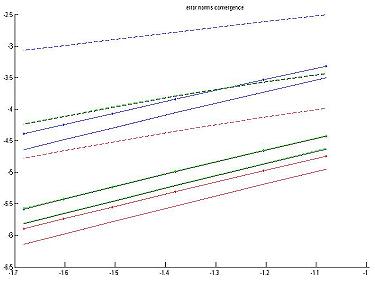

Supplement: Supplementary file 2 [file se-5-461-2014-supplement.zip › supplement/figures for supplement/fig_3_low_lin.jpg]

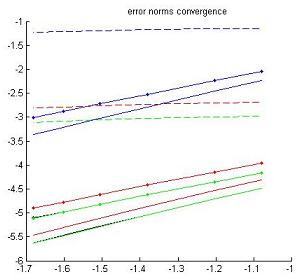

Supplement: Supplementary file 2 [file se-5-461-2014-supplement.zip › supplement/figures for supplement/fig_3_high_lin.jpg]

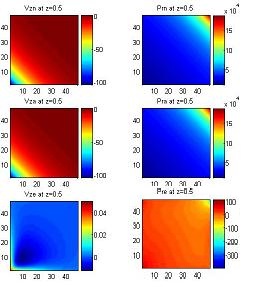

Supplement: Supplementary file 2 [file se-5-461-2014-supplement.zip › supplement/figures for supplement/fig_1b_high.jpg]

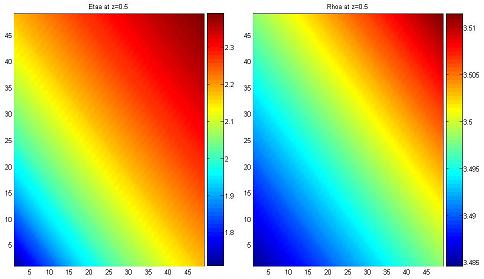

Supplement: Supplementary file 2 [file se-5-461-2014-supplement.zip › supplement/figures for supplement/fig_4_high_lin.jpg]

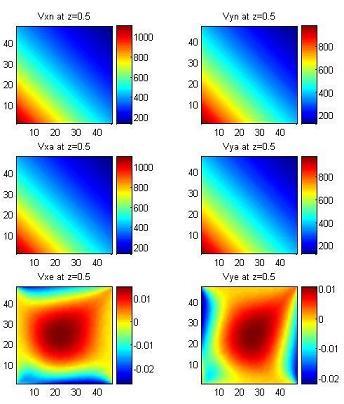

Supplement: Supplementary file 2 [file se-5-461-2014-supplement.zip › supplement/figures for supplement/fig_1a_3D_low.jpg]

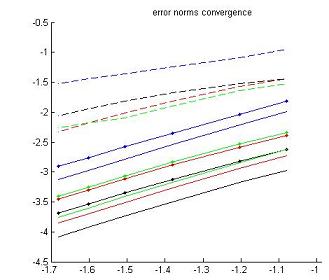

Supplement: Supplementary file 2 [file se-5-461-2014-supplement.zip › supplement/figures for supplement/fig_3_high.jpg]

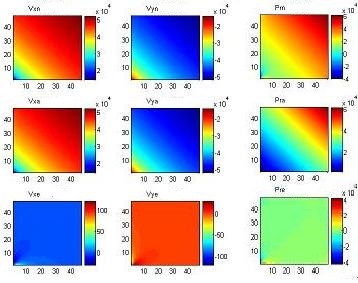

Supplement: Supplementary file 2 [file se-5-461-2014-supplement.zip › supplement/figures for supplement/fig_1_2D_high_lin.jpg]

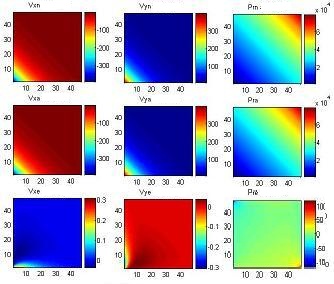

Supplement: Supplementary file 2 [file se-5-461-2014-supplement.zip › supplement/figures for supplement/fig_1_2D_high_exp.jpg]

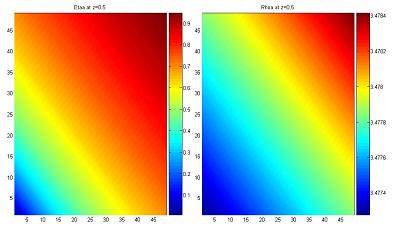

Supplement: Supplementary file 2 [file se-5-461-2014-supplement.zip › supplement/figures for supplement/fig_4_2D_low_lin.jpg]

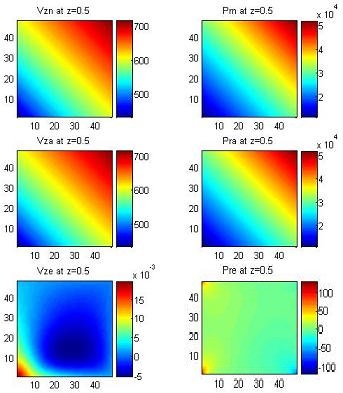

Supplement: Supplementary file 2 [file se-5-461-2014-supplement.zip › supplement/figures for supplement/fig_1b_high_lin.jpg]

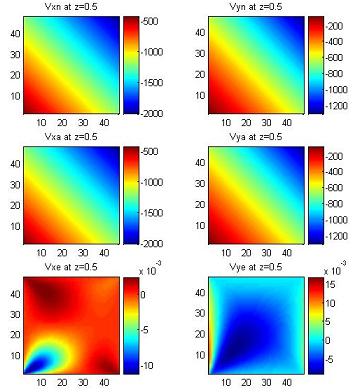

Supplement: Supplementary file 2 [file se-5-461-2014-supplement.zip › supplement/figures for supplement/fig_1a_low_lin.jpg]

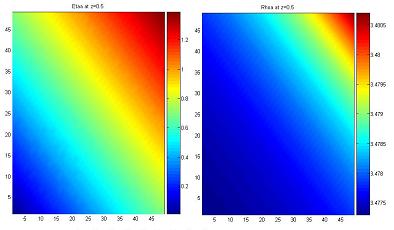

Supplement: Supplementary file 2 [file se-5-461-2014-supplement.zip › supplement/figures for supplement/fig_4_2D_low_exp.jpg]

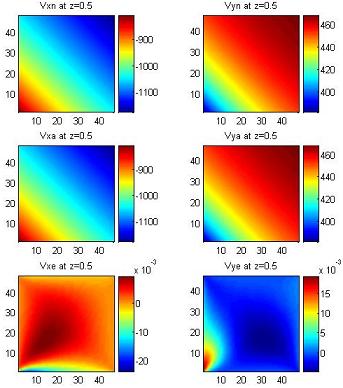

Supplement: Supplementary file 2 [file se-5-461-2014-supplement.zip › supplement/figures for supplement/fig_1a_high_lin.jpg]

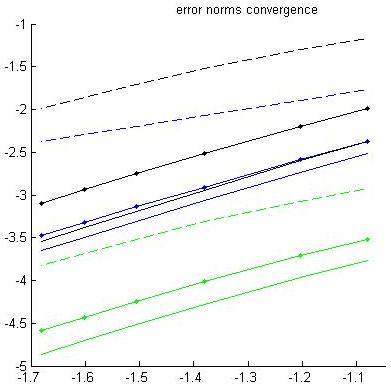

Supplement: Supplementary file 2 [file se-5-461-2014-supplement.zip › supplement/figures for supplement/fig_3_2D_high_exp.jpg]
